1 **Organogenesis and Vasculature of *Anaxagorea* Revealing the Axial Homologs in**

2 **the Carpel and its Implications for the Origin of Angiosperms**

3

4 Ya Li,<sup>1,†</sup> Wei Du,<sup>1,†</sup> Shuai Wang,<sup>2</sup> Xiao-Fan Wang<sup>1,\*</sup>

5 1 College of Life Sciences, Wuhan University, Wuhan 430072, China

6 2 College of Life Sciences and Environment, Hengyang Normal University,

7 Hengyang 421001, China

8 \*Author for correspondence. E-mail: wangxf@whu.edu.cn

9 † Both authors contribute equally to this work

10

11 Running Title:

12 Axial Homologs in Carpel and its Implications for the Origin of Angiosperms

13 Article Type: Original Article

1 **Abstract**

2 **Background and Aims:** The carpel is the definitive structure of angiosperms, the  
3 origin of carpel is of great significance to the phylogenetic origin of angiosperms.  
4 Traditional view was that angiosperm carpels were derived from structures similar to  
5 macrosporophylls of pteridosperms or cycads, which bear ovules on the surfaces of  
6 foliar organs. In contrast, other views indicate that carpels are originated from the  
7 foliar appendage enclosing the ovular axis. One of the key differences between these  
8 two conflicting ideas lies in whether the “axial homologs” are involved in the  
9 evolution of carpel. The aim of this paper is to investigate whether the “axial  
10 homologs” remain in the carpel of extant angiosperms.

11 **Methods:** *Anaxagorea* was used for organogenesis and comparative anatomical study  
12 due to its outstanding and unusually long carpel stipe. The continuous change of  
13 vascular bundles at carpel stipe in different developmental stages was described in  
14 detail.

15 **Key Results:** Organogenesis study shows that the carpel stipe of *Anaxagorea* occurs  
16 at the early stage of carpel development. Vascular bundles at the base of *Anaxagorea*  
17 carpel are a set of discrete ring-arranged collateral bundles (RACBs), which branch  
18 out at the upper portion into two sets of RACBs below each ovule.

19 **Conclusions:** The ring-arranged collateral bundles indicates a clear morphological  
20 evidence for the existence of the “axial homologs” in the carpel and thus support the  
21 idea that carpels originated from the integration of the ovular axis and foliar parts.  
22 This finding may promote reconsiderations regarding the origin of the carpel and

1 facilitate a greater understanding of the phylogenetic relationship between

2 angiosperms, gnetophytes and Cordaitales.

3

4 **Key words:** *Anaxagorea*; axial homologs; carpel; origin of angiosperms; vascular

5 anatomy.

## 1 INTRODUCTION

2 Angiosperms—the flowering plants— make up much of the visible world of modern  
3 plants. Both the beautiful flowers and the delicious fruits are closely related to human  
4 life. The name “angiosperm” is derived from the Greek words angeion, meaning  
5 “container,” and sperma, meaning “seed.” Therefore, the carpel, a “seeds container”, is  
6 the definitive structure of angiosperms. The carpel is an angiosperm-specific female  
7 reproductive feature in flowers and is the basic unit of the gynoecium, which  
8 protectively surrounds the ovules by closure and sealing along their rims or flanks  
9 (Dunal, 1817; Robinson-Beers, 1992; Endress, 2015). The evolution of the carpel set  
10 angiosperms apart from other seed plants, which developed ovules that are exposed to  
11 the air. Since the time of Darwin, elucidating the origin of angiosperms and their  
12 evolutionary success represents a primary goal in plant science. Scientists have  
13 attempted to search for possible ancestors of angiosperms through phylogenetic  
14 analysis based on fossil, morphological, and molecular data. In these efforts,  
15 particular emphasis has been placed on assessing the ease with which the  
16 ovule-bearing structures of various seed plants could be transformed into a carpel.

17

18 Mainstream theories of flower origins provide differing explanations that could be  
19 divided into two competing groups based on the assumed organogenetic homologies  
20 of the carpel. The “phyllosporous origin” theory suggests that the carpel is a foliar  
21 homolog called “megasporophyll” and the ovule either originated directly from the  
22 “megasporophyll” or transferred to the “megasporophyll” ectopically (organs borne in

1 an atypical location). Under this scenario, the flower arose from a shoot bearing a  
2 series of foliar homologs (e.g., Euanthial theory [Arber and Parkin, 1907; Eyde, 1975];  
3 early version of “Anthophyte” theory [Melville, 1963; Stebbins, 1974; Retallack and  
4 Dilcher, 1981; Crane, 1985; Doyle and Donoghue, 1986]; the Mostly Male theory  
5 [Frohlich and Parker, 2000]). In contrast, the “stachyosporous origin” theory suggests  
6 that the carpel is integrated axial-foliar originated (originated from the integration of  
7 the ovular axis and foliar appendage). Various hypotheses supporting the  
8 “stachyosporous origin” theory assumed different ancestors for angiosperms. Some  
9 hypotheses suggest that the placenta in the carpel is homologous with a female  
10 short-shoot of gymnosperms with distally placed ovules, each with scales forming the  
11 outer integument. It follows then that the angiosperm carpel is the result of a trend  
12 towards the continual reduction in the number of scales and ovules and increased  
13 protection of the ovules by the surrounding organs (e.g., Pseudanthial theory  
14 [Wettstein, 1907, 1935; Eames, 1952]; Neo-Pseudanthial theory [Nixon *et al.*, 1994;  
15 Hickey and Taylor, 1996]; the Unifying Theory [Wang, 2010, 2018]). Another  
16 hypothesis holds that the cupule wall of seed ferns provides a homolog for the outer  
17 integument of angiosperm ovule and that expansion and folding of the cupule-bearing  
18 axis became the progenitor of the carpel (e.g., Caytonialean hypothesis [Doyle, 1978,  
19 2006, 2008]). Despite assumptions for different ancestors of angiosperms,  
20 “stachyosporous origin” theory suggests that flowers derived from a compound shoot,  
21 that is, from an axis that bears leaf homologs, which in turn produced axillary shoots  
22 that bear ovules or microsporangia and the additional leaf homologs. However, it is

1 still difficult to reach an agreement on the origin of flowers regarding these views  
2 because of (1) there is a lack of intermediate stages between the extant angiosperm  
3 carpel and comparable reproductive structures in fossils, (2) the phylogenetic  
4 relationships are uncertain among angiosperms and other seed plant lineages, and  
5 most importantly (3) no axial ovules have been found in extant angiosperms from  
6 what we know at present.

7

8 According to the above-mentioned hypotheses, the current debate focuses on whether  
9 or not the “axial homologs” existence in the carpel is of great significance to the  
10 origin of the carpel. Following the logic that there is no doubt the carpel wall is  
11 derived from “foliar homologs”, as long as the “axial homologs” in the carpel are  
12 determined, the carpel should be axial-foliar originated as the “stachyosporous origin”  
13 theory suggested. Recently, some vascular anatomy studies (e.g., *Actinidia* [Guo et al.,  
14 2013]; *Magnolia* [Liu et al., 2014]; *Dianthus* [Guo et al., 2017]; *Michelia* [Zhang et  
15 al., 2017]) proposed that the vascular system of placenta is independent to that of the  
16 ovary wall in the angiosperm carpel. Vascular bundles appear amphicribal (an  
17 amphicribal bundle has its xylem surrounded by the phloem) in the placenta, whereas  
18 they are collateral (a collateral bundle has adaxial xylem and abaxial phloem) in the  
19 ovary wall. Collateral bundles are typical arrangements of vascular bundles in  
20 angiosperms (Evert and Eichhorn, 2011). In different organs, the distribution of the  
21 collateral bundles is dissimilar. On the cross section of the stem in most angiosperms  
22 (other than monocots), discrete collateral bundles form a single ring (hereinafter

1 abbreviated as ring-arranged collateral bundles, RACBs) around the pith. In leaves  
2 (other than monocots), the largest collateral bundle often extends along the long axis  
3 of the leaf as a midvein, from which smaller veins diverge laterally (Metcalfe and  
4 Chalk, 1979; Evert, 2006; Beck, 2010; McKown and Dengler, 2010). Comparatively,  
5 amphicribal bundles are frequently seen in small branches of early land plants, in  
6 monocots, or in young branches of dicots as simplification and combination of the  
7 RACBs (Fahn, 1990). The fact that vascular bundles of the placenta are independent  
8 from the ovary wall, and the placenta bundles are amphicribal might provide  
9 possibility for the “stachyosporous origin” of the carpel. However, the combination of  
10 these two lines of evidence are still insufficient because of the flexibility of vascular  
11 bundles, which brings some controversy (Endress, 2019). We believe it is possible to  
12 find a more appropriate material from which extant angiosperms show clearer  
13 evidence for the existence of “axial homologs” via anatomical study.

14

15 In this study, the carpel of extant angiosperm *Anaxagorea* (Annonaceae) was selected  
16 for organogenesis and vascular anatomic examination, aimed at finding dependable  
17 “axial homologs” as evidence for the integrated axial-foliar origin of the carpel.  
18 Annonaceae are one of the largest families of Magnoliales, which is one of the most  
19 important lineages in the early radiation of angiosperms (Sauquet et al., 2003).  
20 *Anaxagorea* is phylogenetically the most basal genus in Annonaceae (Doyle and le  
21 Thomas, 1996; Doyle et al., 2004), which live in dimly-lit riparian zones in forest  
22 slope understory habitats. In this genus, plants have simple leaves that are alternately

1 arranged in two rows along the stems and the flowers usually have whorled  
2 phyllotaxis. Gynoecium are apocarpous (free carpels) throughout the life history  
3 (Deroin, 1988). Each carpel of *Anaxagorea* has a notable long stipe (Endress and  
4 Armstrong, 2011), which is one of the important characteristics of the genus. Our  
5 investigation is based on the considerations that (1) morphological features shared by  
6 *Anaxagorea* are relatively primitive in angiosperms, (2) the presence of the notable  
7 carpel stipe makes it possible to determine whether there are “axial homologs” in the  
8 carpel through tissue sectioning.

9

## 10 **MATERIALS AND METHODS**

### 11 *Study species and sites*

12 Flower samples of *Anaxagorea luzonensis* and *Anaxagorea javanica* were collected in  
13 July 2017 at the Diaoluo Mountain (Hainan, China) and Xishuangbanna Tropical  
14 Botanical Garden (Yunnan, China), respectively. The former usually has two to four  
15 carpels, whereas the latter has a multicarpellate gynoecium.

16

### 17 *SEM and paraffin slices*

18 Flower samples were collected at different floral stages (from early bud to young  
19 fruit). Gynoeciums were isolated from the other parts of the flower and preserved in  
20 formalin–acetic acid–70% alcohol (5:5:90, v/v). The fixed material was dehydrated  
21 through a series of alcohol solutions ranging from 50% to 100%. To delineate the  
22 structure and development of carpel, some carpels were removed from the



1 gynoeciums and passed through an iso-pentanol acetate series (SCR, Shanghai,  
2 China), and then critically point-dried, sputter-coated with gold, and were observed  
3 and photographed using a scanning electron microscope (Tescan VEGA-3-LMU,  
4 Brno, Czech). To illustrate the vasculature of carpel, some carpels were embedded in  
5 paraffin, sectioned serially into sections of 10- to 12- $\mu$ m thickness, and then stained  
6 with Safranin O and Fast Green. Complete transverse and longitudinal series were  
7 examined and photographed under a light microscope (Olympus BX-43-U, Tokyo,  
8 Japan) and bright field optics.

9

## 10 **RESULTS**

### 11 *Carpel organogenesis*

12 In *A. luzonensis* and *A. javanica*, carpels are free from each other completely (Figs.  
13 1G, 2A). Each carpel consists of a plicate zone (Figs. 1G, 3B–H), a very short  
14 ascidiate zone (Fig. 2C, here we definite ascidiate zone as a carpel region bearing  
15 ovules while having no ventral slits), and a conspicuous long stipe (Figs. 1G, 3I–M).  
16 Carpel primordia are approximately hemispherically initiated (Fig. 1A). Carpel stipe  
17 forms early at the basal part in the early stage of carpel development (Figs. 1C, J),  
18 remains elongate, takes up roughly a quarter length of the carpel at anthesis (Fig. 1G),  
19 and continues to elongate during the fruit-stage. Continuous growth of the flanks on  
20 the ventral side of the young carpel raises the early closure. The closure does not  
21 extend to the bottom of the carpel (Fig. 1D). Subsequently, the dorsal part of each  
22 carpel notably thickens and the stigma forms (Figs. 1E, F). At anthesis, carpels are

1    widest at the basal part, with an arch on abaxial side (Fig. 1G). Each carpel has two  
2    lateral ovules with the placentae at the base of the ovary (Figs. 2F, M, 3A).

3

#### 4    *Carpel vasculature*

5    Main vascular bundles of *Anaxagorea* carpel are distinct as a dorsal bundle, a pair of  
6    ventral bundles, a pair of ovule bundles, and several lateral bundles (Figs. 2F, M, 3A,  
7    F). Vascular system here are described from the base up to the carpel for easier  
8    comprehension of vascular transformation according to the schematic (Fig. 3). At the  
9    base of each carpel stipe, discrete collateral bundles form a ring (RACBs) around the  
10    pith-like cell groups (Figs. 2A, I, 3M). At the slightly upper part of the carpel stipe,  
11    those discrete bundles tend to join adjacent bundles in phloem (Fig. 3L), subsequently  
12    separate, and finally are gathered into three groups: a dorsal bundle and two sets of  
13    lateral bundle complexes (LBCs, Fig. 3K). Each set of LBCs is assembled into an  
14    amphicribal bundle in the young carpel (Fig. 2B). While in the mature carpel, each  
15    set of LBCs is assembled as a set of RACBs, and thus there are two sets of RACBs in  
16    one carpel (Figs. 2E, K, 3J). Below each placenta, each set of RACBs (or  
17    amphicribal bundle) is transformed to a set of “C”-shaped bundle complexes (CBCs),  
18    from which several collateral bundles separate from each set of CBCs, and merge  
19    with each other to form an amphicribal bundle, which is kept separate from other  
20    bundles (Figs. 2C, L, 3G–I). Each set of CBCs allocates an ovule bundle into each  
21    ovule and other bundles into the carpel wall, where the ventral bundles are also  
22    separated (Figs. 2D, F, M, 3E–F). On the cross section of the ovary locule, both

1 ventral bundles and ovule bundles are amphicribal (Figs. 2G, H). In the carpel wall,  
2 lateral bundles present as pinnate arranged collateral bundles, which are connected to  
3 form meshy complexes by poorly-differentiated strands (Figs. 2M, 3D, E). The dorsal  
4 bundle is also connected with lateral bundles by poorly-differentiated strands (Figs.  
5 2D, 3F). Upon the ovule locule, bundles in the carpel wall join each other with xylem  
6 and phloem and finally diminish (Figs. 3B, C).

7

## 8 **DISCUSSION**

### 9 *Morphological analysis*

10 Organogenesis study shows that the carpel stipe of *Anaxagorea* occurs at the early  
11 stage of carpel development and continues to elongate with the development of the  
12 carpel. It is different from the mericarp stipes of other Annonaceae plants, the latter of  
13 which are not obvious until the fruit stage, and partly comes from the elongated  
14 receptacle (e.g., *Annona*, *Cananga*, *Uvari*, *Xylopia* [Deroin, 1999]). The carpel stipe  
15 in *Anaxagorea* provides a buffer space for the drastic changes in structure of the  
16 vascular bundle at the base of carpel, whereas in most angiosperms with apocarpy, the  
17 base of the carpel is very close to the placenta and the vascular bundle in this part  
18 tends to be simplified (e.g., *Michelia* [Tucker, 1961]; *Sagittaria* [Kaul, 1967]; *Drimys*  
19 [Tucker, 1975]; *Illicium* [Robertson and Tucker, 1979]; *Brasenia* [Endress, 2005]).  
20 The RACBs at the basal cross sections act in accordance with a typical form of the  
21 stem vascular anatomy of most angiosperms other than monocots (e.g., Caprifoliaceae;  
22 Leguminosae; Ulmaceae). In the distal region, a single collateral bundle separated

1 from the basal RACBs, showed foliar homology. The remainder gathered into two  
2 sets of RACBs below each placenta, which are especially obvious in the more mature  
3 carpel, and showed axial homology. As we know, the vascular distribution in the  
4 leaves are lateral organized in most seed plants (e.g., Pinaceae; Gnetaceae;  
5 Magnoliaceae; Gramineae; Brassicaceae). Even in the branching veins in *Ginkgo*,  
6 each of the veins is a single collateral bundle. The topological structure of the lateral  
7 organized bundles is equivalent to a curve, and the curved surface can only form a  
8 one-way tunnel (like macaroni pasta) by coiling. However, the branching RACBs  
9 (one set of RACBs branch into two sets of RACBs) in the carpel of *Anaxagorea* are  
10 equivalent to a three-way tunnel. The branching of RACBs in each carpel seems to be  
11 reliable evidence for the existence of “axial homologs” in the carpel because the foliar  
12 homologs (lateral organs) cannot form such a topology by coiling transformation.

13

14 In the carpel of *Anaxagorea*, amphicribal bundles were observed in the young carpel  
15 stipe and in the funiculus of the mature ovule as simplification and combination of the  
16 RACBs. The fact that the amphicribal bundles are widespread in the carpel and  
17 funiculus of angiosperms (e.g., *Papaver* [Kapoor, 1973], *Psoraleae* [Lersten and Don,  
18 1966], *Drimys* [Tucker, 1975], *Nicotiana* [Dave et al., 1981], *Whytockia* [Wang and  
19 Pan, 1998], *Pachysandra* [Von Balthazar and Endress, 2002], *Actinidia* [Guo et al.,  
20 2013], *Magnolia* [Liu et al., 2014]; *Dianthus* [Guo et al., 2017]; *Michelia* [Zhang et  
21 al., 2017]) would be a reasonable result if the ovule-placenta in the carpel is  
22 originated from the ovular axis. In addition, we should notice that a carpel has

1 developed as a functional entity, and there is no axis or axillary shoot in the carpel.  
2 The words “axial homologs” we use are mainly to emphasize the possible  
3 phylogenetic origination of the carpel.

4

#### 5 *Homology Comparison*

6 The existence of “axial homologs” in carpels might facilitate understanding of the  
7 phylogenetic origin of angiosperms by homology comparison. In outgroups, the  
8 female reproductive shoots, which are similar to the branching RACBs-placenta  
9 complex in the carpel of *Anaxagorea*, can be found in *Ephedra* and the extinct  
10 Cordaitales-like plants (Fig. 4).

11

12 *Ephedra* is an extant gymnosperm representing gnetophytes. Neo-Pseudanthial theory  
13 suggested that the angiosperm carpel arose from the foreshortening and integration of  
14 the female reproductive shoot of *Ephedra* (Hickey and Taylor, 1996). Our results  
15 suggest that the carpel vasculature of *Anaxagorea* has branching RACBs and is  
16 comparable with the female reproductive shoot of *Ephedra*. If the branching RACBs  
17 are the plesiomorphy of the common ancestor of angiosperms and *Ephedra*, then it is  
18 more plausible that the carpels have stronger homology with the female reproductive  
19 shoot than the cupule-bearing axis in *Caytonia* (Doyle, 1978, 2008) because the  
20 cupule-bearing axis of *Caytonia* does not bear the secondary shoot. Despite the  
21 phylogenetic hypothesis that *Ephedra* are the closest living relatives of angiosperms  
22 in the Neo-Pseudanthial theory, this position has currently been refuted (Hajibabaei et

1 al., 2006; Wickett et al., 2014; Wan et al., 2018). However, we should be careful not  
2 to discard the homology comparison as an independent component of the theory.  
3  
4 Other views have provided a relatively moderate explanation that angiosperms,  
5 conifers, and gnetophytes (*Ephedra*, *Gnetum*, *Welwitschia*) are derived from a  
6 common ancestor in Cordaitales (Eames, 1952; Bold, 1973; Hickey and Taylor, 1996;  
7 Doyle, 2008; Wang, 2010, 2018). The Unifying Theory (Wang, 2010, 2018) suggests  
8 that angiosperm carpels are derived from the sterile bracts (formed carpel wall)  
9 attached to the reproductive secondary shoot (formed ovule/placenta) of Cordaitales.  
10 Taking Cordaitales as the common ancestor of angiosperms and other gymnosperms  
11 may resolve the contradiction between the similar morphological characters and the  
12 distant phylogenetic relationship between angiosperms and gnetophytes. The  
13 branching RACBs of *Anaxagorea* carpels suggest that the carpel might comparable to  
14 a compound shoot and provide an understanding of how the bract-bracteole-terminal  
15 ovule system in Cordaitales-like gymnosperms evolved to an angiosperm carpel.  
16  
17 Our results provide more reliable evidence for the existence of “axial homologs” in  
18 the carpel of extant angiosperms. An “axial homolog” should not appear in the  
19 “megasporophyll”. However, if that is true, angiosperm carpels should be integrated  
20 axial-foliar originated. Nature follows the principle that selecting a simple mechanism  
21 or module as building blocks for a complex system and then using that module  
22 repeatedly in other systems. The presentation of “axial homologs” in carpel seems the

1 embodiment of this rule.

1    **FUNDING**

2    This work was supported by the National Natural Science Foundation of China [grant  
3    number 31270282, 31970250].

4

5    **ACKNOWLEDGEMENTS**

6    We thank Chun-Hui Wang, Shi-Rui Gan, and Yan-Lian Qiu for their help in searching  
7    for the target species in the field, to Qing-Long Wang for his help to take care of the  
8    transplanting materials in Hainan province, and to Lan-Jie Huang and Ke Li for their  
9    advice on writing.



1 **LITERATURE CITED**

- 2 **Arber EAN, Parkin J. 1907.** On the origin of angiosperms. *Journal of the Linnean*  
3 *Society of London* **38**: 29–80.
- 4 **Beck CB. 2010.** *An Introduction to Plant Structure and Development: Plant Anatomy*  
5 *for the Twenty-first Century*, 2nd edn. Cambridge, New York: Cambridge  
6 University Press.
- 7 **Bold HC. 1973.** *Morphology of plants*, 3rd edn. New York: Harper & Row.
- 8 **Crane PR. 1985.** Phylogenetic analysis of seed plants and the origin of angiosperms.  
9 *Annals of the Missouri Botanical Garden* **72**: 716–793.
- 10 **Dave YS, Patel ND, Rao KS. 1981.** Structural design of the developing fruit of  
11 *Nicotiana tabacum*. *Phyton* **21**: 63–71.
- 12 **Deroin T. 1988.** *Aspects anatomiques et biologiques de la fleur des Annonacées*. PhD  
13 Thesis. Centre d'Orsay: Université de Paris-Sud, France.
- 14 **Deroin T. 1999.** Functional Impact of the Vascular Architecture of Flowers in  
15 Annonaceae and Magnoliaceae, and Its Bearing on the Interpretation of the  
16 Magnoliaceous Gynoecium. *Systematics and Geography of Plants* **68**: 213–224.
- 17 **Doyle JA, Donoghue MJ. 1986.** Seed plant phylogeny and the origin of angiosperms:  
18 an experimental cladistic approach. *The Botanical Review* **52**: 321–431.
- 19 **Doyle JA, Le Thomas A. 1996.** Phylogenetic analysis and character evolution in  
20 Annonaceae. *Adansonia* **18**: 279–334.
- 21 **Doyle JA, Sauquet H, Scharaschkin T, Le Thomas A. 2004.** Phylogeny, molecular  
22 and fossil dating, and biogeographic history of Annonaceae and Myristicaceae  
23 (Magnoliales). *International Journal of Plant Sciences* **165**: S55–S67.
- 24 **Doyle JA. 1978.** Origin of angiosperms. *Annual Review of Ecology and Systematics* **9**:  
25 365–392.

- 1 **Doyle JA. 2006.** Seed ferns and the origin of angiosperms. *Journal of the Torrey*  
2 *Botanical Society* **133**: 169–209.
- 3 **Doyle JA. 2008.** Integrating molecular phylogenetic and paleobotanical evidence on  
4 origin of the flower. *International Journal of Plant Sciences* **169**: 816–843.
- 5 **Dunal MF. 1817.** *Monographie de la famille des Anonacées*. Paris: Treuttel & Würtz.
- 6 **Eames AJ. 1952.** Relationships of the Ephedrales. *Phytomorphology* **2**: 79–100.
- 7 **Endress PK, Armstrong JE. 2011.** Floral development and floral phyllotaxis in  
8 *Anaxagorea* (Annonaceae). *Annals of Botany* **108**: 835–845.
- 9 **Endress PK. 2005.** Carpels in *Brasenia* (Cabombaceae) are Completely Ascidiata  
10 Despite a Long Stigmatic Crest. *Annals of Botany* **96**: 209–215.
- 11 **Endress PK. 2015.** Patterns of angiospermy development before carpel sealing across  
12 living angiosperms: diversity, and morphological and systematic aspects. *Botanical*  
13 *Journal of the Linnean Society* **178**: 556–591.
- 14 **Endress PK. 2019.** The morphological relationship between carpels and ovules in  
15 angiosperms: pitfalls of morphological interpretation. *Botanical Journal of the*  
16 *Linnean Society* **189**: 201–227.
- 17 **Evert RF, Eichhorn SE. 2013.** *Raven Biology of Plants*, 8th edn. Palgrave Macmillan:  
18 W.H. Freeman Press.
- 19 **Evert RF. 2006.** *Esau's Plant Anatomy. Meristems, Cells, and Tissues of the Plant*  
20 *Body: Their Structure, Function, and Development*, 3rd edn. Hoboken, NJ: John  
21 Wiley & Sons, Inc.
- 22 **Eyde RH. 1975.** The foliar theory of the flower. *American Scientist* **63**: 430–437.
- 23 **Fahn A. 1990.** *Plant anatomy*, 4th edn. Oxford: Pergamon Press.
- 24 **Frohlich MW, Parker DS. 2000.** The mostly male theory of flower evolutionary  
25 origins: from genes to fossils. *Systematic Botany* **25**: 155–170.

- 1 **Guo XM, Xiao X, Wang GX, Gao RF. 2013.** Vascular anatomy of kiwi fruit and its  
2 implications for the origin of carpels. *Frontiers in Plant Science* **4**: 391. doi:  
3 10.3389/fpls.2013.00391
- 4 **Guo XM, Yu YY, Bai L, Gao RF. 2017.** *Dianthus chinensis* L.: the structural  
5 difference between vascular bundles in the placenta and ovary wall suggests their  
6 different origin. *Frontiers in Plant Science* **8**: 1986. doi: 10.3389/fpls.2017.01986
- 7 **Hajibabaei M, Xia J, Drouin G. 2006.** Seed plant phylogeny: Gnetophytes are  
8 derived conifers and a sister group to Pinaceae. *Molecular Phylogenetics and*  
9 *Evolution* **40**: 208–217.
- 10 **Hickey LJ, Taylor DW. 1996.** Origin of the angiosperm flower. In: Taylor DW,  
11 Hickey LJ, eds. *Flowering plant origin, evolution & phylogeny*. New York:  
12 International Thomson publishing, 176–231.
- 13 **Kapoor LD. 1973.** Constitution of amphicribral vascular bundles in capsule of  
14 *Papaver somniferum*. Linn. *Botanical Gazette* **134**: 161–165.
- 15 **Kaul RB. 1967.** Development and vasculature of the flowers of *Lophotocarpus*  
16 *calycinus* and *Sagittaria latifolia* (Alismaceae). *American Journal of Botany* **54**:  
17 914–920.
- 18 **Lersten NR, Don KW. 1966.** The discontinuity plate, a definitive floral characteristic  
19 of the *Psoraleae* (Leguminosae). *American Journal of Botany* **53**: 548–555.
- 20 **Liu WZ, Hilu K, Wang YL. 2014.** From leaf and branch into a flower: *Magnolia*  
21 tells the story. *Botanical Studies* **55**: 28. doi: 10.1186/1999-3110-55-28
- 22 **McKown AD, Dengler NG. 2010.** Vein patterning and evolution in C4 plants. *Botany*  
23 **88**: 775–786.
- 24 **Melville R. 1963.** A new theory of the angiosperm flower II. *Kew Bulletin* **17**: 1–63.
- 25 **Metcalf CR, Chalk L. 1979.** *Anatomy of the Dicotyledons, vol. 1, Systematic*

- 1        *Anatomy of Leaf and Stem, with a Brief History of the Subject*, 2nd edn. Oxford:  
2        Clarendon Press.
- 3        **Nixon KC, Crepet WL, Stevenson D, Friis EM. 1994.** A reevaluation of seed plant  
4        phylogeny. *Annals of the Missouri Botanical Garden* **81**: 484–533.
- 5        **Retallack G and Dilcher DL. 1981.** A coastal hypothesis for the dispersal and rise to  
6        dominance of flowering plants. In: Niklas KJ, eds. *Paleobotany, Paleoecology and*  
7        *Evolution*. New York: Praeger Publishers, 27–77.
- 8        **Robertson RE, Tucker SC. 1979.** Floral ontogeny of *Illicium floridanum*, with  
9        emphasis on stamen and carpel development. *American Journal of Botany* **66**:  
10       605–617.
- 11       **Robinson-Beers K, Pruitt RE, Gasser CS. 1992.** Ovule development in wild-type  
12       *Arabidopsis* and two female-sterile mutants. *Plant Cell* **4**: 1237–1249.
- 13       **Sauquet H, Doyle JA, Scharaschkin T, et al. 2003.** Phylogenetic analysis of  
14       Magnoliales and Myristicaceae based on multiple data sets: implications for  
15       character evolution. *Botanical Journal of the Linnean Society* **142**: 125–186.
- 16       **Stebbins GL. 1974.** *Flowering Plants: Evolution above the Species Level*. Cambridge,  
17       Massachusetts: The Belknap Press of Harvard University Press.
- 18       **Tucker SC. 1975.** Carpellary vasculature and the ovular vascular supply in *Drimys*.  
19       *American Journal of Botany* **62**: 191–197.
- 20       **Tucker SC. 1961.** Phyllotaxis and vascular organization of the carpels in *Michelia*  
21       *fuscata*. *American Journal of Botany* **48**: 60–71.
- 22       **Von Balthazar M, Endress PK. 2002.** Reproductive structures and systematics of  
23       Buxaceae. *Botanical Journal of the Linnean Society* **140**: 193–228.
- 24       **Wan T, Liu ZM, Li LF, et al. 2018.** A genome for gnetophytes and early evolution of  
25       seed plants. *Nature Plants* **4**: 82–89.

- 1 **Wang X. 2010.** *The dawn angiosperms*. Heidelberg: Springer.
- 2 **Wang X. 2018.** *The dawn angiosperms*, 2nd edn. Heidelberg: Springer.
- 3 **Wang YZ, Pan KY. 1998.** Comparative floral anatomy of *Whytockia* (Gesneriaceae)  
4 endemic to China. In: Zhang AL, Wu SG eds. *Floristic Characteristics and*  
5 *Diversity of East Asian Plants*. Beijing: China Higher Education Press, 352–366.
- 6 **Wettstein R. 1907.** Über des vorkommen zweigeschlechtig Infloreszenzen bei  
7 *Ephedra*. *Festschrifter Naturwissenschaften Vereins Universitiit Wien* **25**: 21–28.
- 8 **Wettstein R. 1935.** *Handbuch der systematischen Botanik*, 4th edn. Leipzig: Franz  
9 Deuticke.
- 10 **Wickett NJ, Mirarab S, Nguyen N, et al. 2014.** Phylotranscriptomic analysis of the  
11 origin and early diversification of land plants. *Proceedings of the National Academy*  
12 *of Sciences of the United States of America* **111**: E4859–E4868.
- 13 **Zhang X, Liu W, Wang X. 2017.** How the ovules get enclosed in magnoliaceous  
14 carpels. *PLoS One* **12**: e0174955. doi:10.1371/journal.pone.0174955

1 **FIG. 1.** SEM of *Anaxagorea* carpel. (A–G) *A. luzonensis*. (A) Carpel primordia. (B–C)  
2 Appearance of the basal stipe. (D) Incomplete stipe closure. (E–F) Carpel thickening  
3 and stigma formation. (G) Carpel stipes at anthesis (box). (H–K) *A. javanica* shows  
4 similar carpel developmental features correlating with changes depicted in (A, C, D,  
5 F). Carpel stipes are marked by arrows. Abbreviations: c, carpel; s, stamen; p, perianth.  
6 Scale bars: (A–F, H–K) = 100  $\mu\text{m}$ ; (G) = 1 mm.

7

8 **FIG. 2.** Paraffin sections of carpels stained with Safranin O and Fast Green. (A–D)  
9 Anthetic carpels of *A. luzonensis*, from base up. (A) The ring-arranged collateral  
10 bundles (RACBs) at the base of carpel, ventral sides are marked by arrows. (B)  
11 Bundle complexes with xylem surrounded by phloem in each carpel (ring marked). (C)  
12 A short ascidiate zone. (D) Ovule bundles separate from the CBCs. (E–H) Mature  
13 carpel of *A. luzonensis*. (E) Two sets of RACBs at the level of (B). (F) Ventral bundles  
14 (vb) and ovule bundles (ob). (G) Detailed view of a vb from (F). (H) Detailed view of  
15 an ob from (F). (I–M) Mature carpel of *A. javanica*, from base up. (I) RACBs at the  
16 base of carpel, a distinct collateral bundle marked by ring. (J–K) Bundles rearranged  
17 into two sets of RACBs. (L) The CBCs with phloem joint each other. (M) The base of  
18 ovule locule. Abbreviations: db, dorsal bundle; vb, ventral bundle; ob, ovule bundle.  
19 Scale bars = 200  $\mu\text{m}$ .

20

21 **FIG. 3.** Drawings of sequential sections of a mature *Anaxagorea* carpel. Vasculature  
22 colored with phloem dark green and xylem red; distinct vascular bundles within the

1 vascular complex are outlined. (A) Schematic longitudinal section with ventral side at  
2 the left. Vertical zones labeled with letters correspond to the transverse sections of  
3 panels to the right. (B–M) Transverse sections (ventral side up) here are described  
4 from the base up to the carpel in the following. (M) The ring-arranged collateral  
5 bundles (RACBs) at the base of carpel. (J–L) Vasculature changes from a set of  
6 RACBs at the base of the carpel to two sets of RACBs. (H–I) Vasculature changes  
7 from each set of RACBs to the “C”-shaped bundle complexes (CBCs). (E–G) Ovule  
8 bundles are separated from the CBCs, while others into the carpel wall. (B–D) Meshy  
9 bundles in the carpel wall. Abbreviations: db, dorsal bundle; vb, ventral bundle; ob,  
10 ovule bundle. Scale bars = 500  $\mu\text{m}$ .

11

12 **FIG. 4.** Homology comparison between *Anaxagorea* carpel vasculature and female  
13 reproductive shoot of seed plants. The color implies homologies. Cordaitales is a  
14 Carboniferous to Permian gymnosperm group. On the female reproductive shoot of  
15 Cordaitales, the ovules (yellow) are interspersed with sterile scales (light green), and  
16 ovular axis bearing bracteoles (yellow). The bracteoles on the ovular axis may  
17 aggregate to the ovule and the ovular axis become shorter. Arrangement of the ovules  
18 on the shoot apex (dark green) and the of lengths ovular axis are relatively flexible.  
19 *Ephedra* as a genus represents gnetophytes, which shows its female reproductive  
20 shoot with subtending bracts (light green), have a pair of ovules (yellow) at their  
21 apical end with the abortive apex of the shoot axis (dark green) lying in between. The  
22 axis bearing a pair of ovules and their envelope is called gynocladal axis.

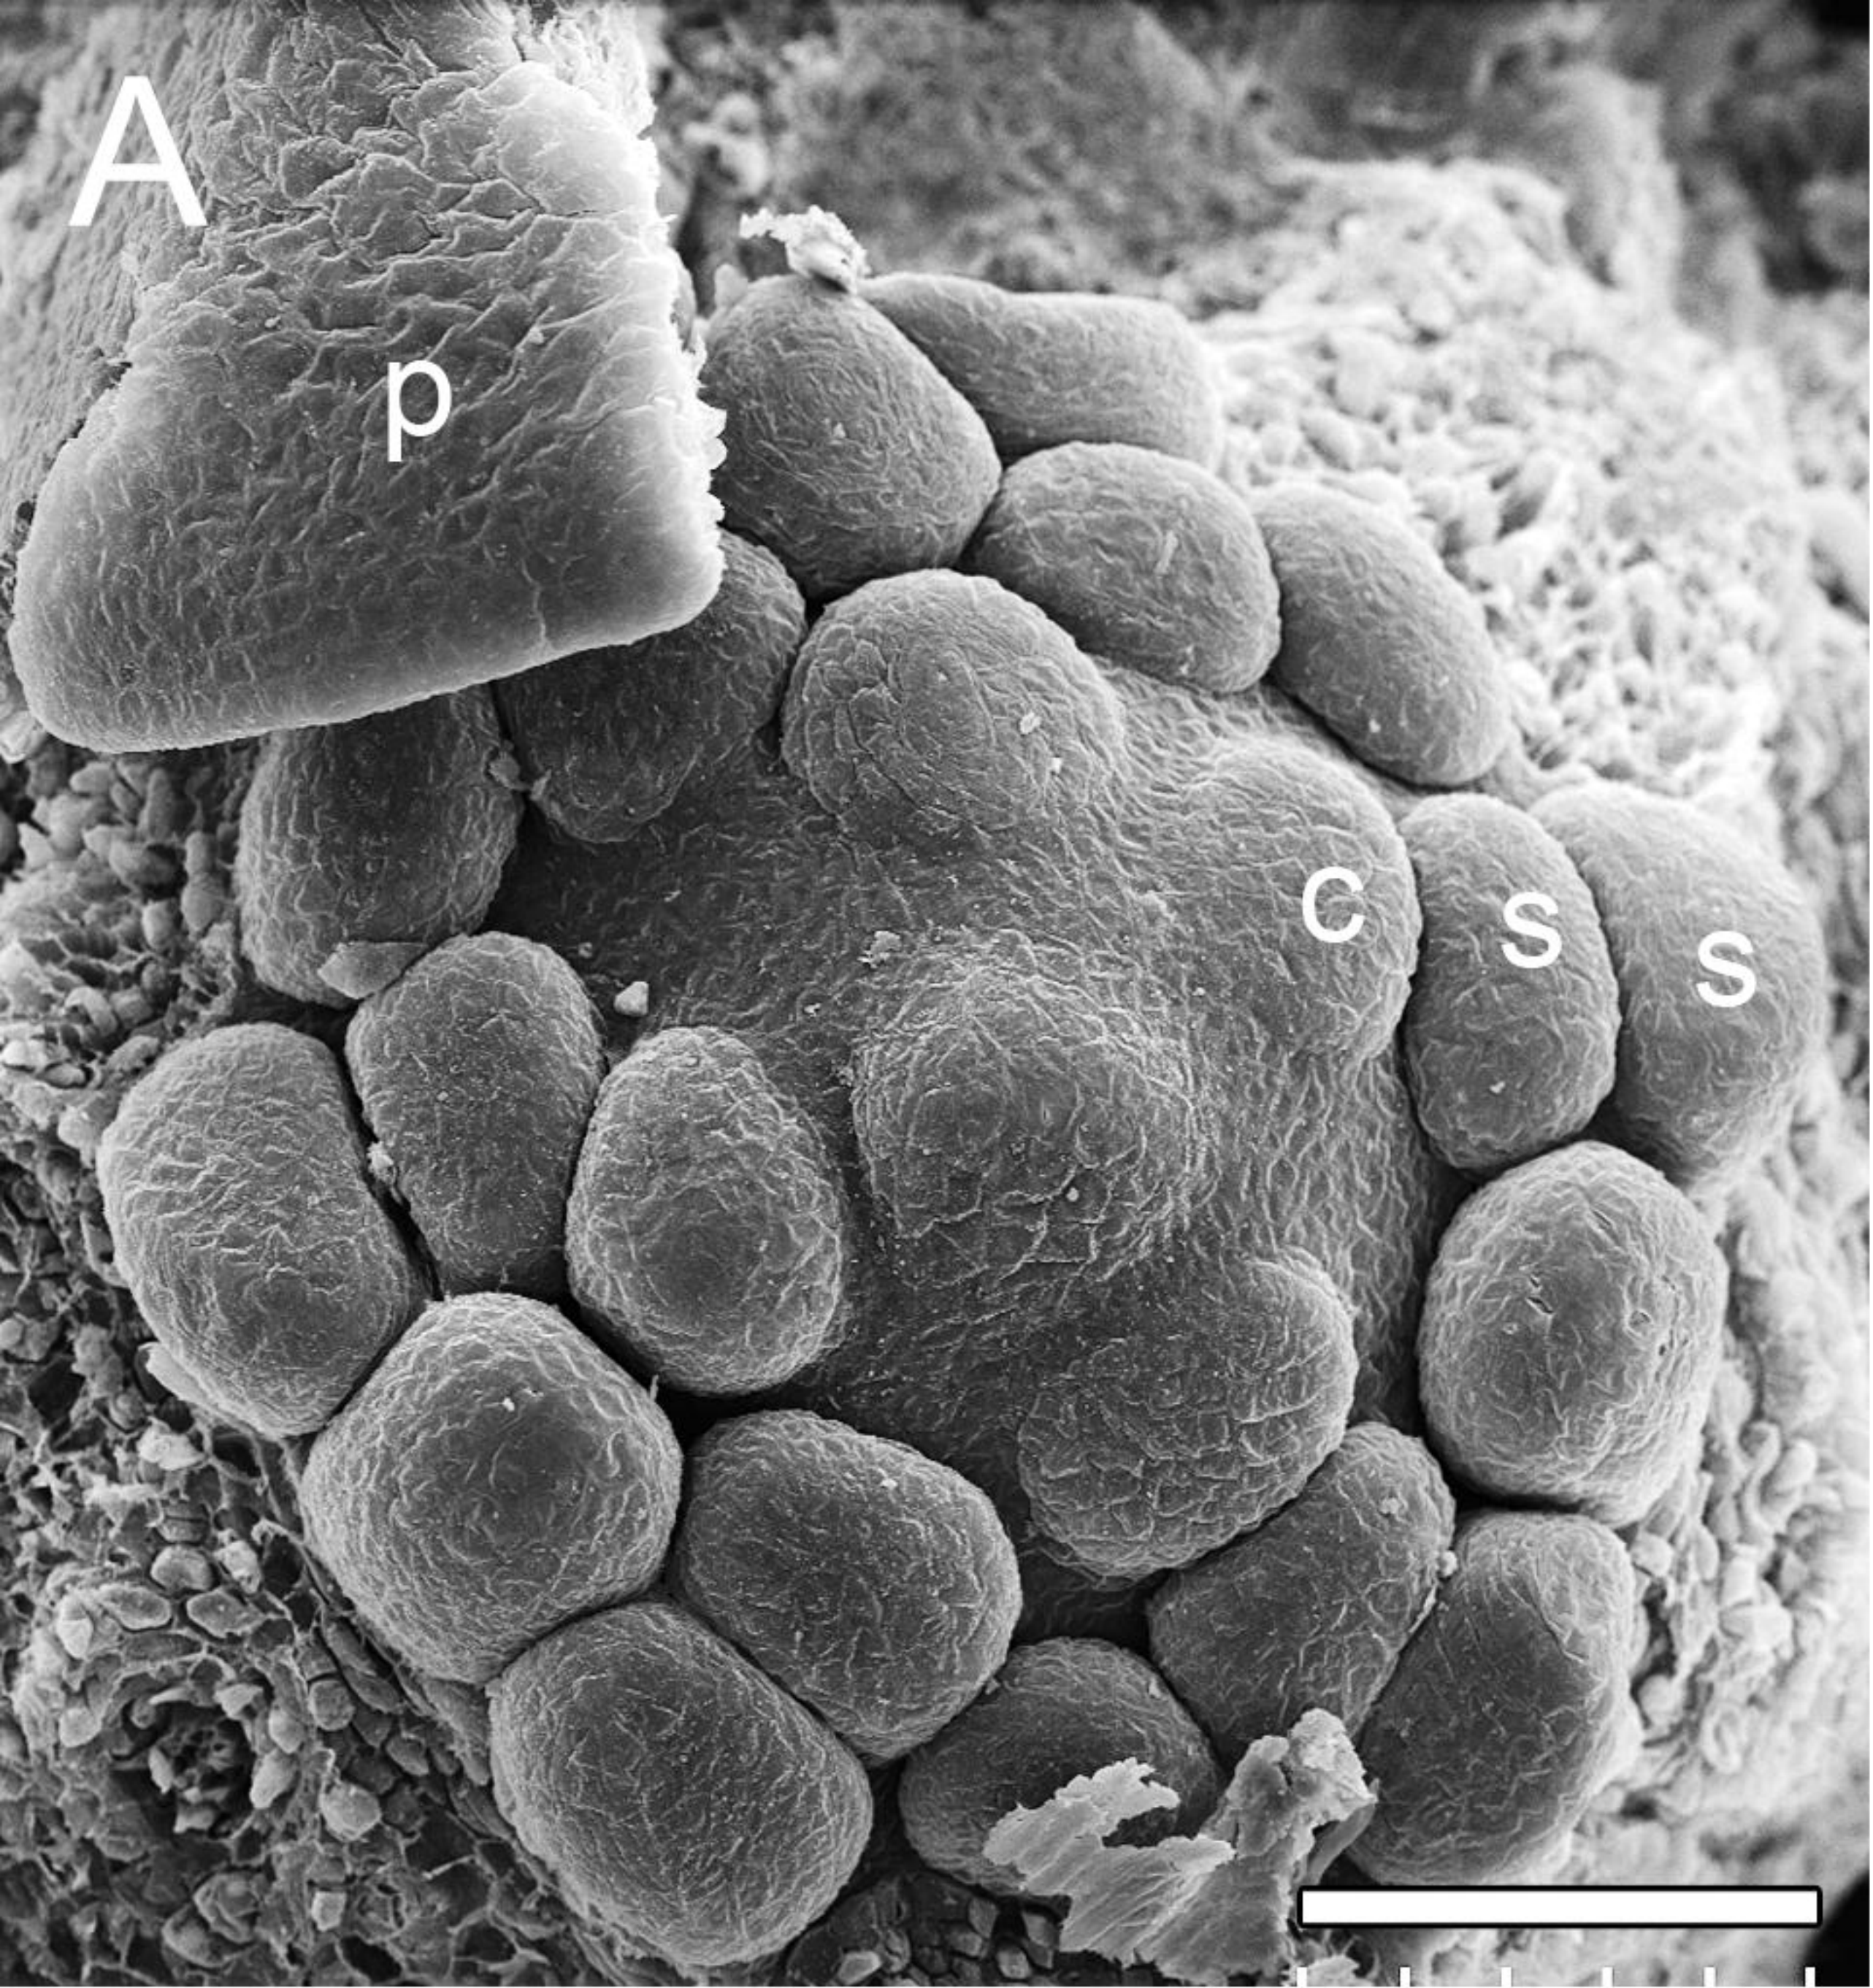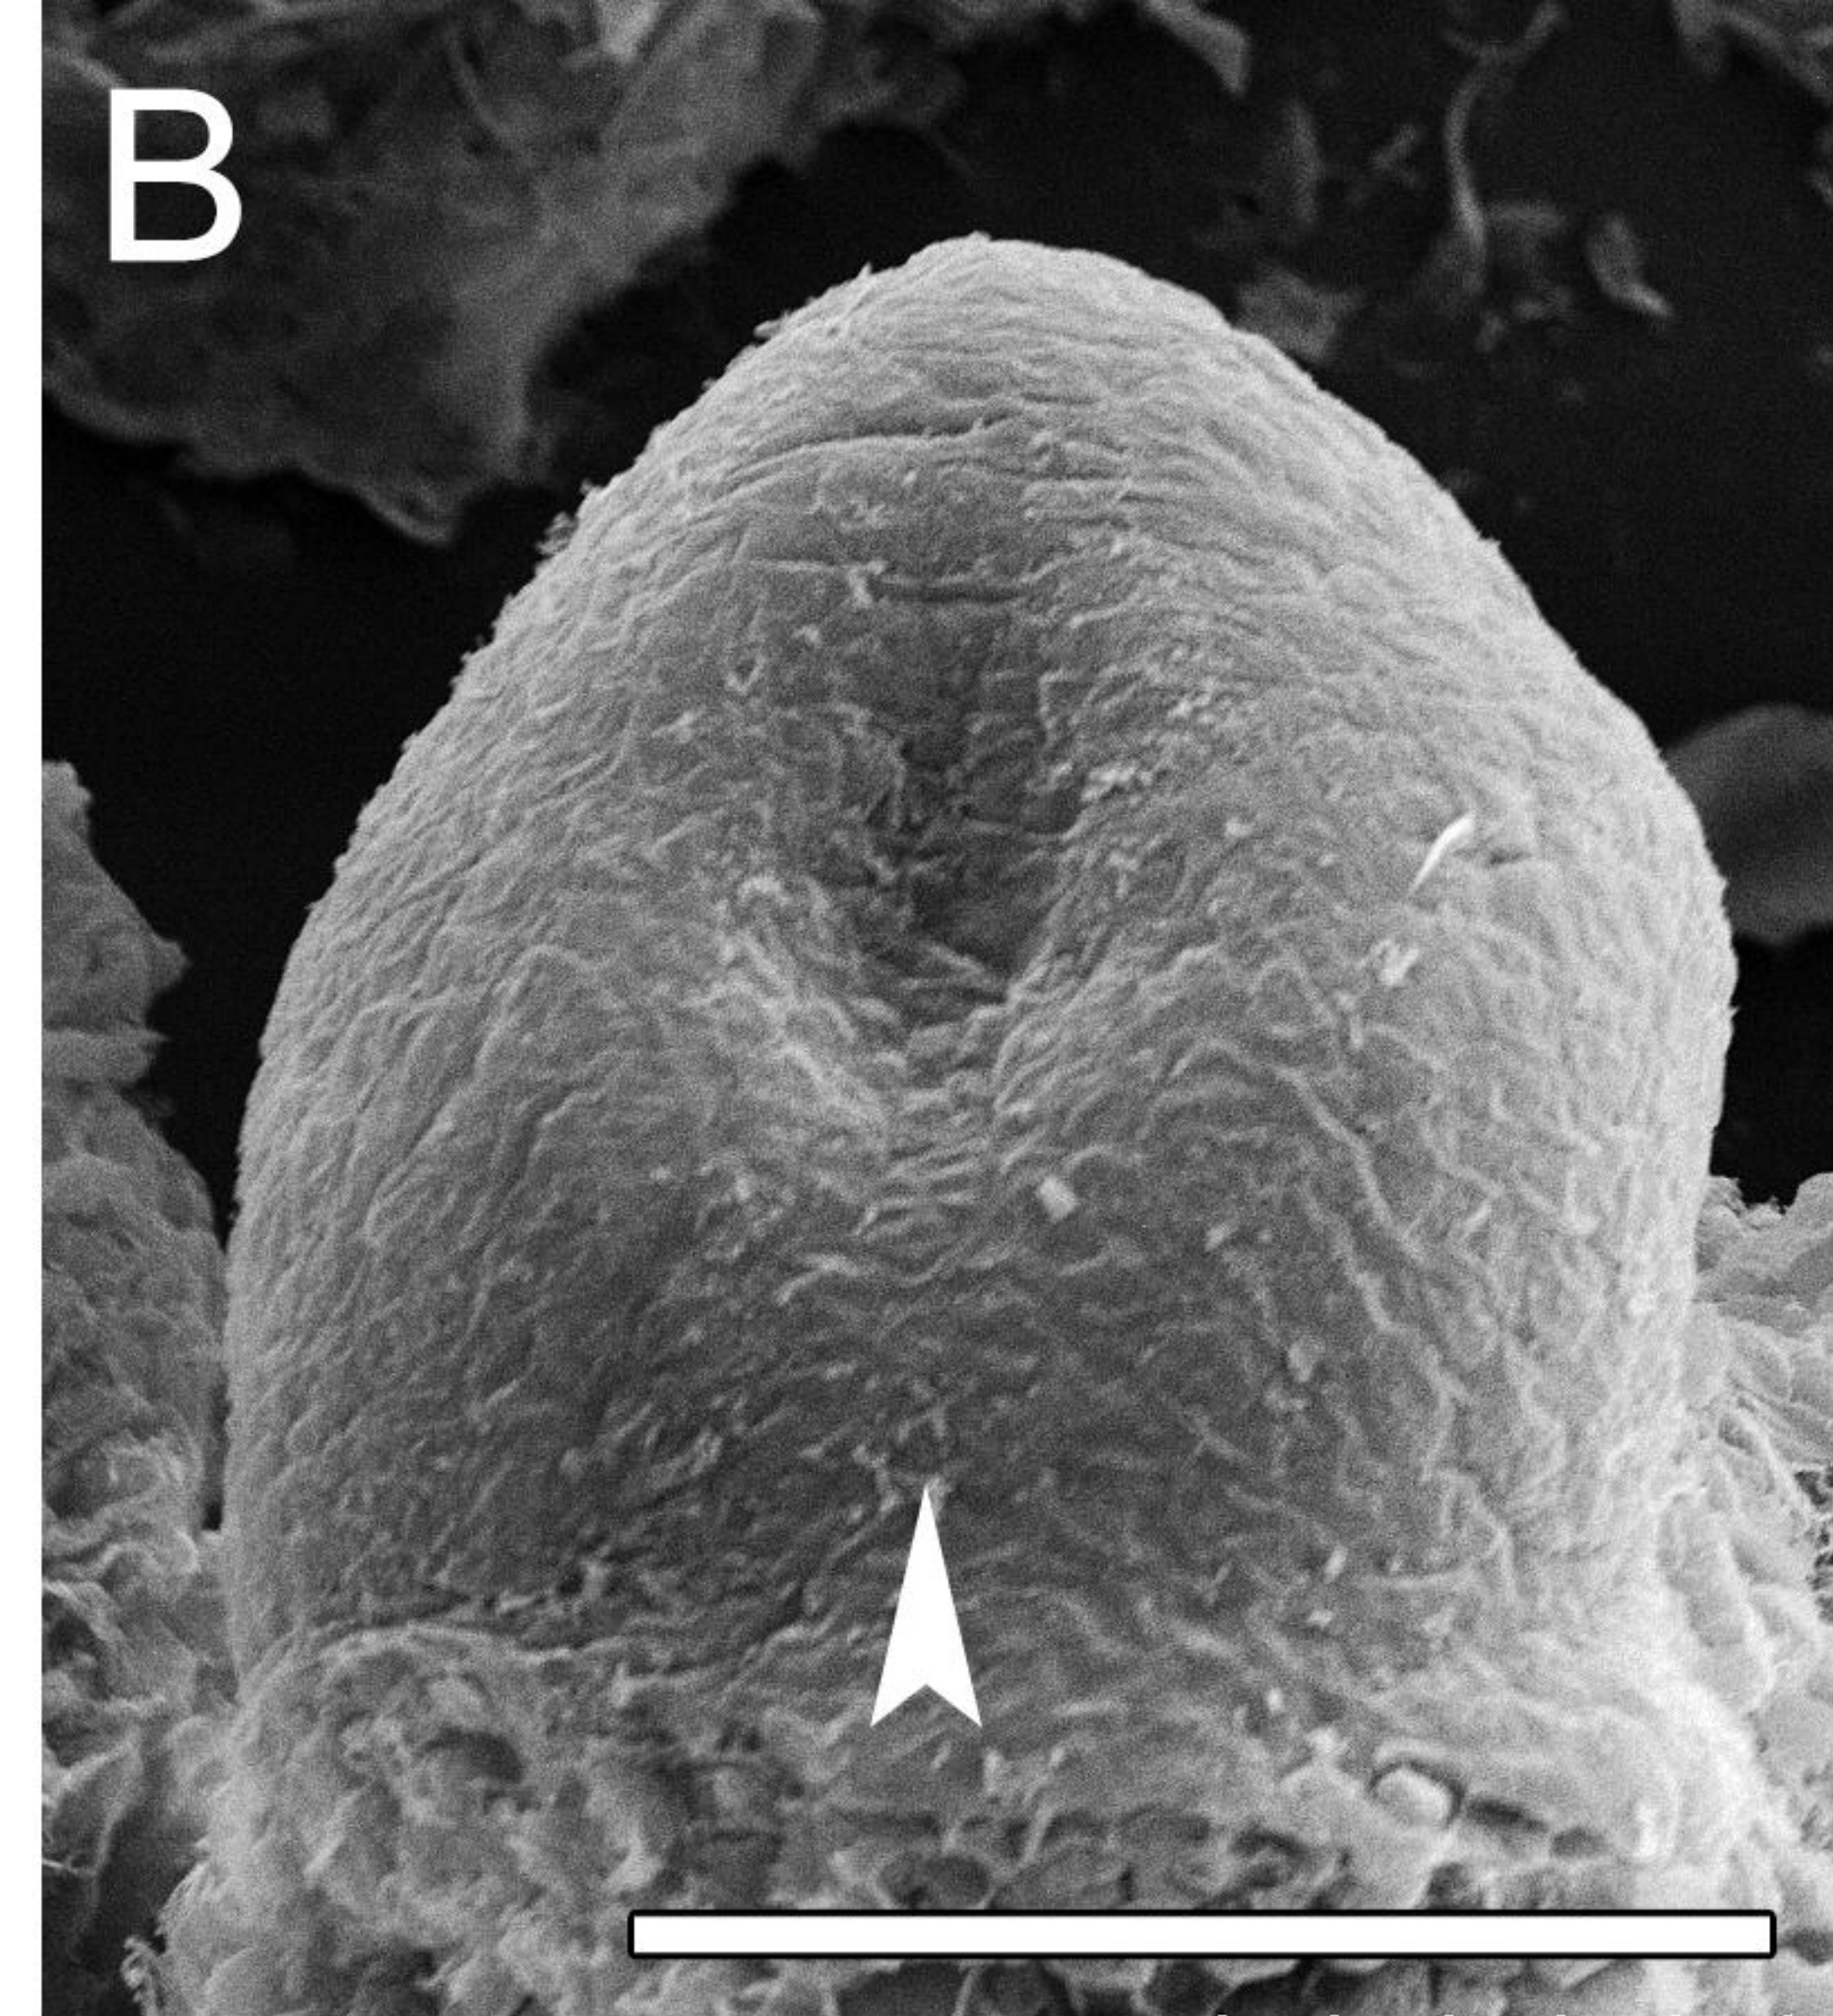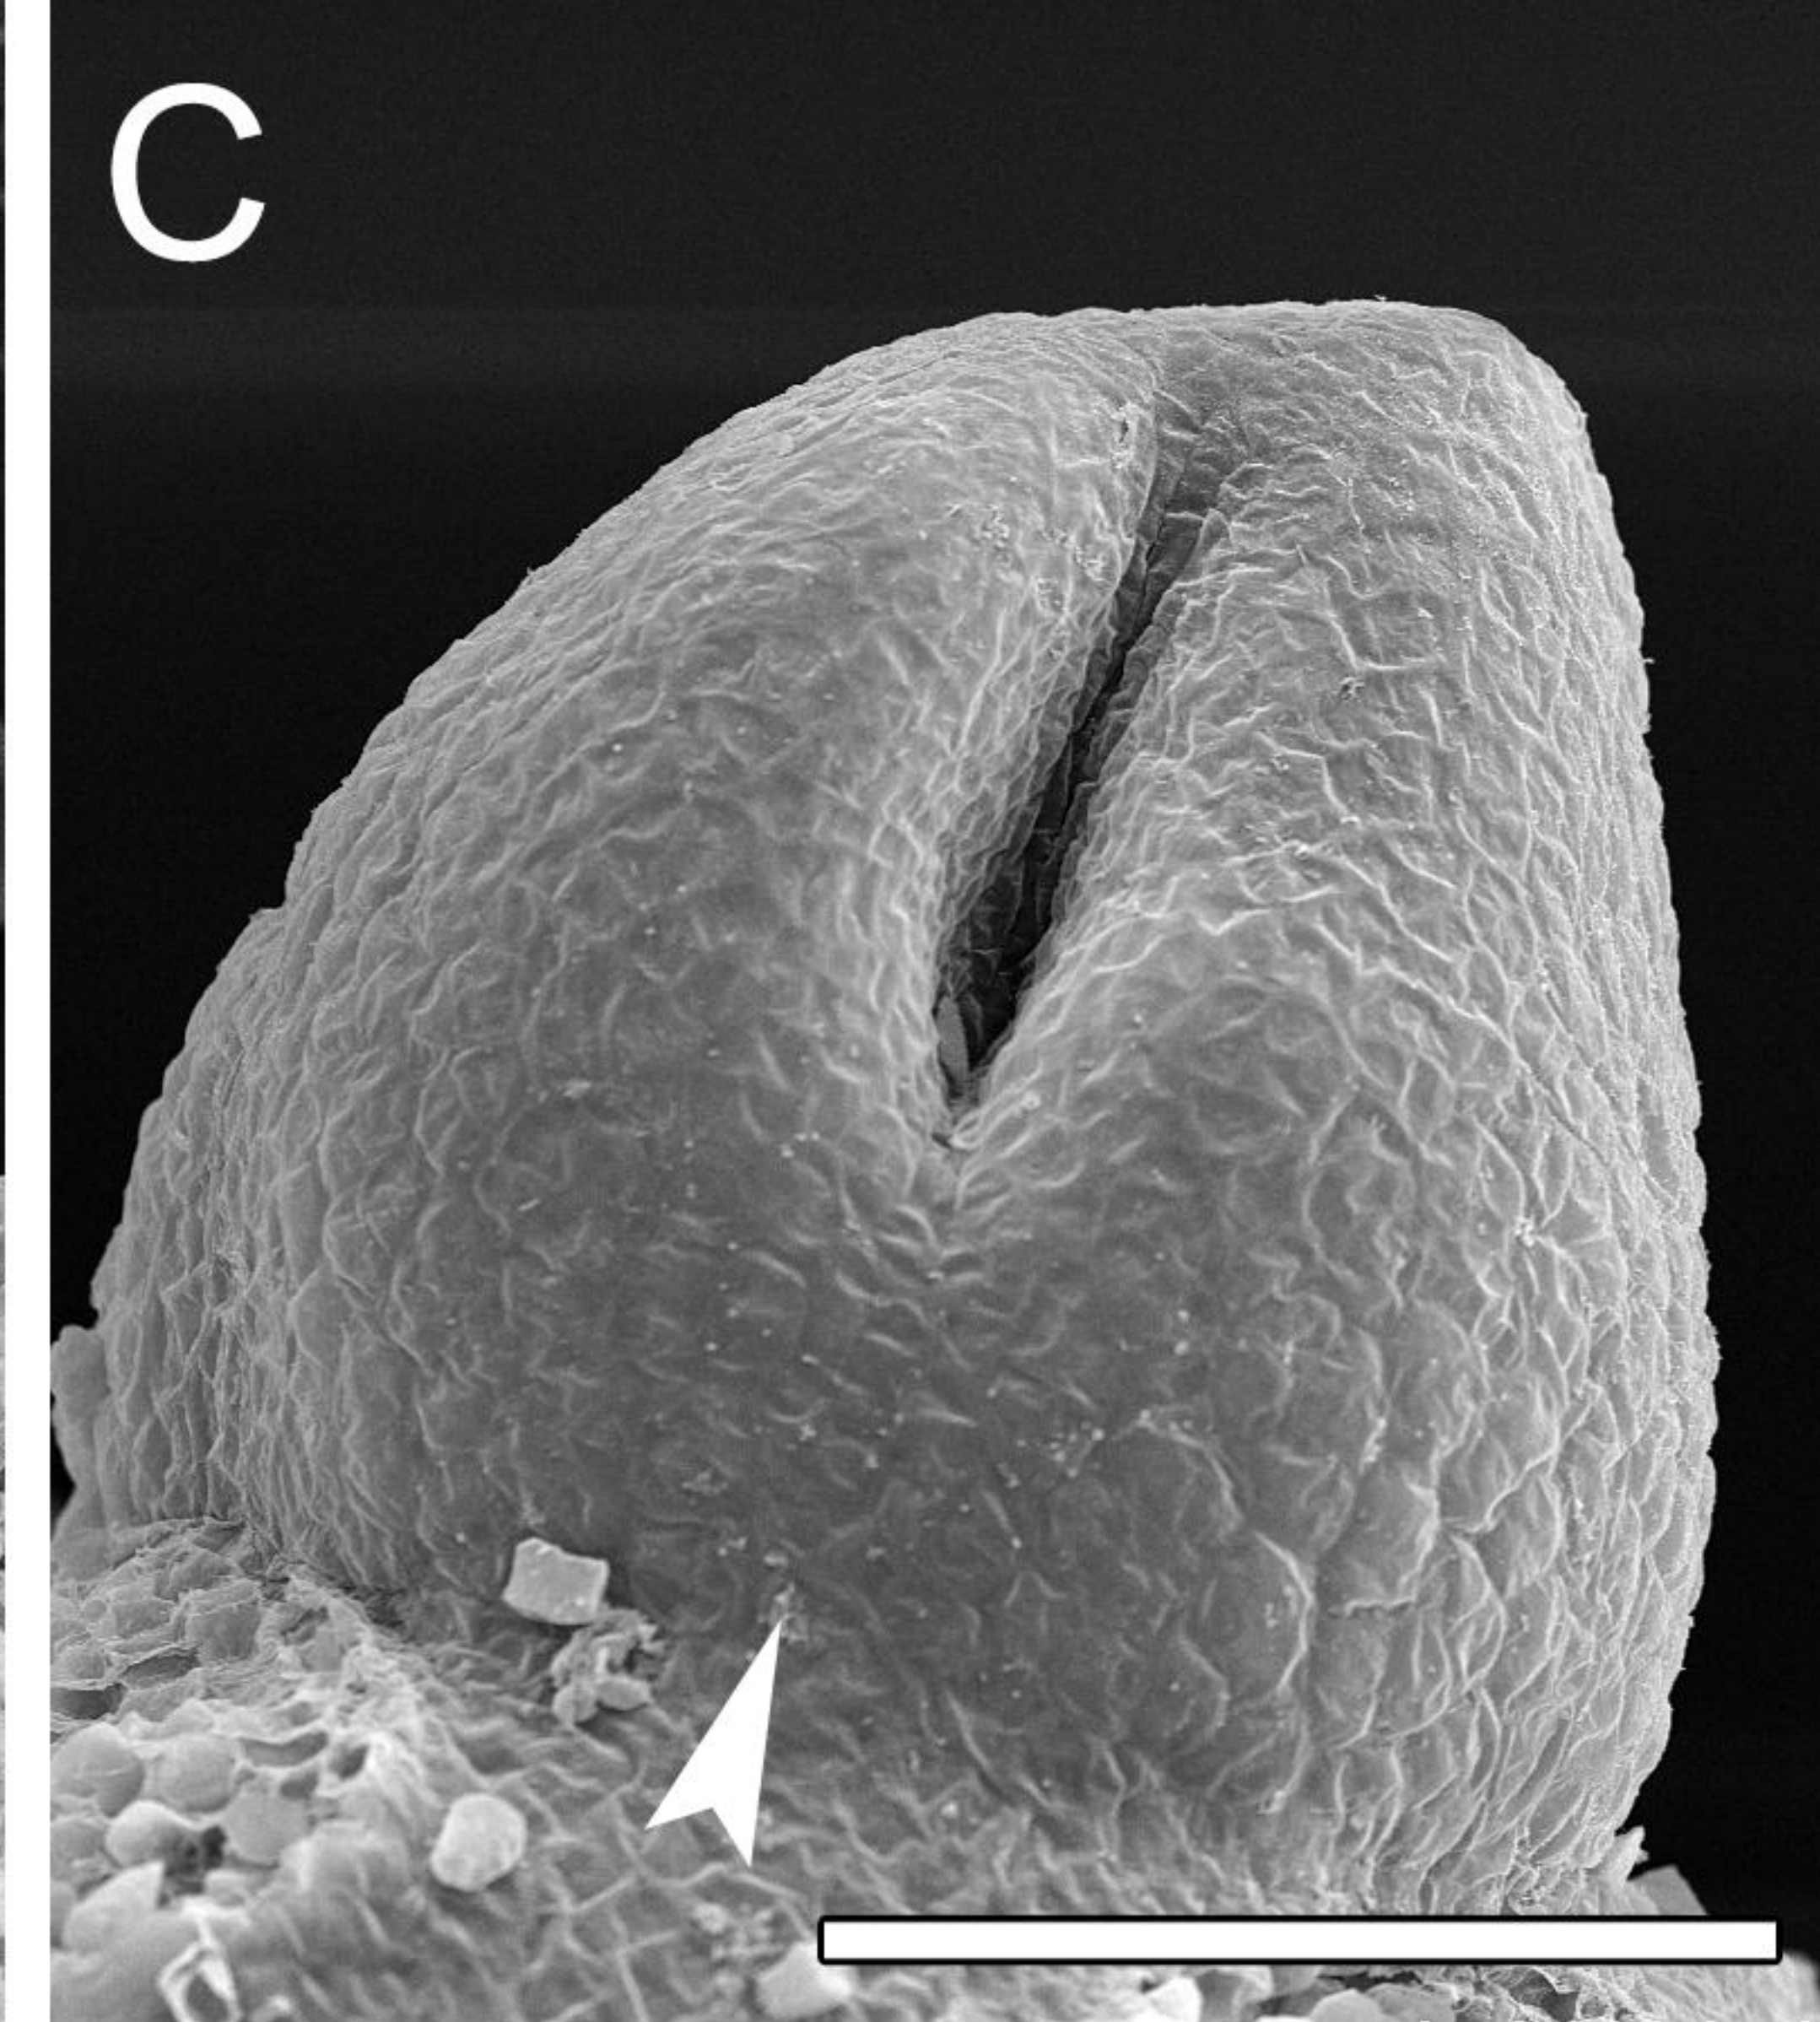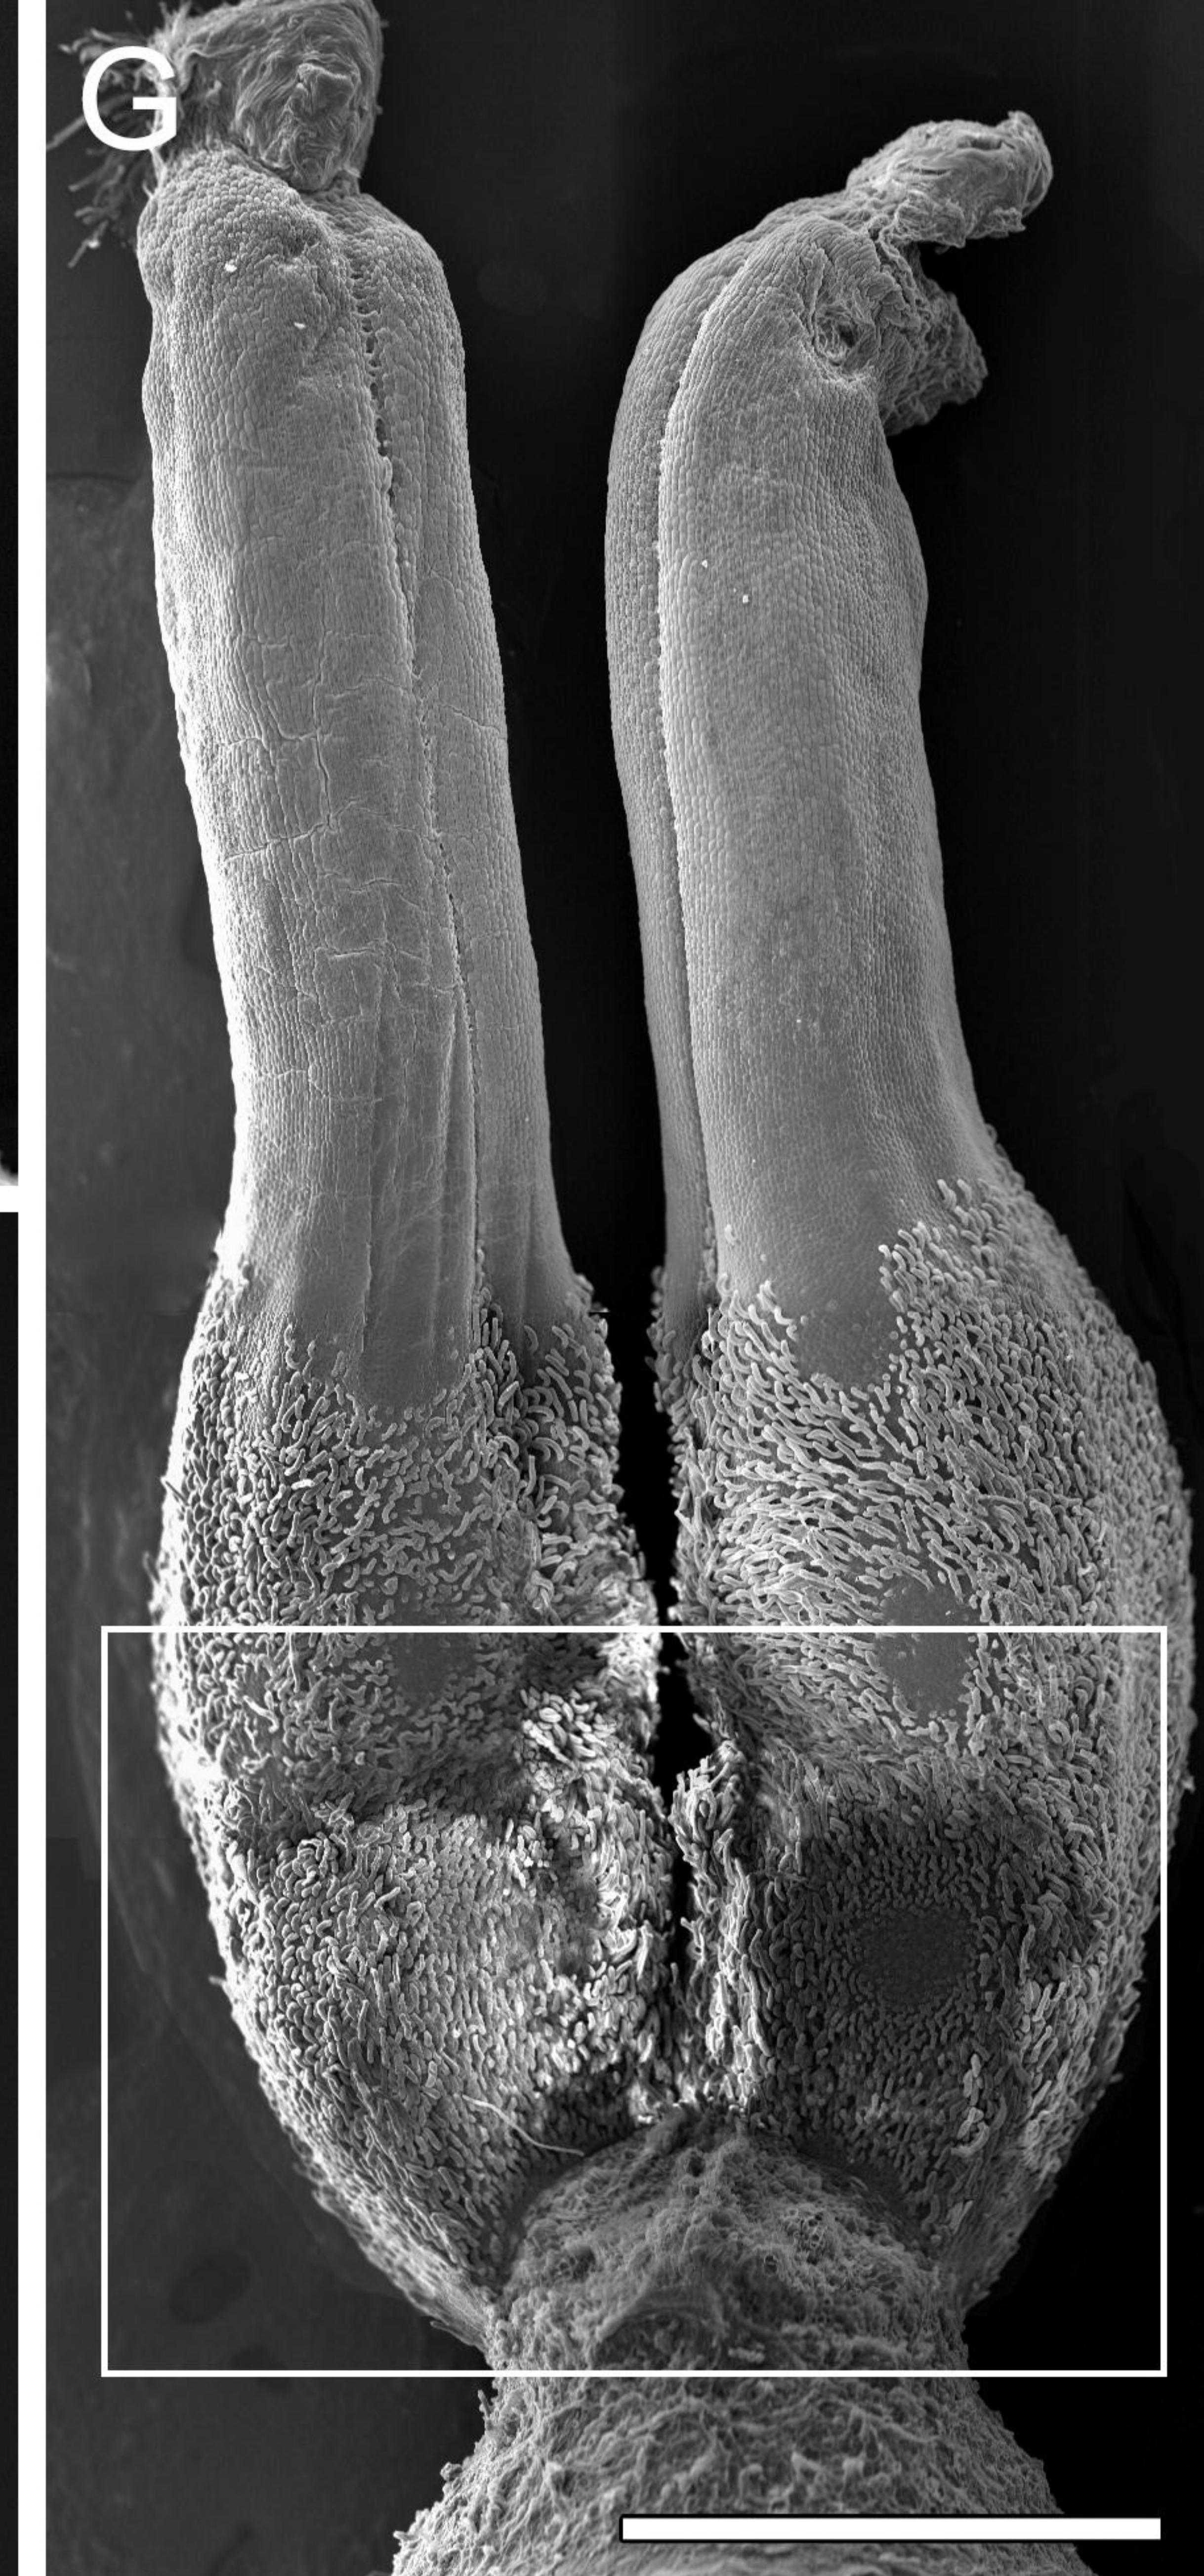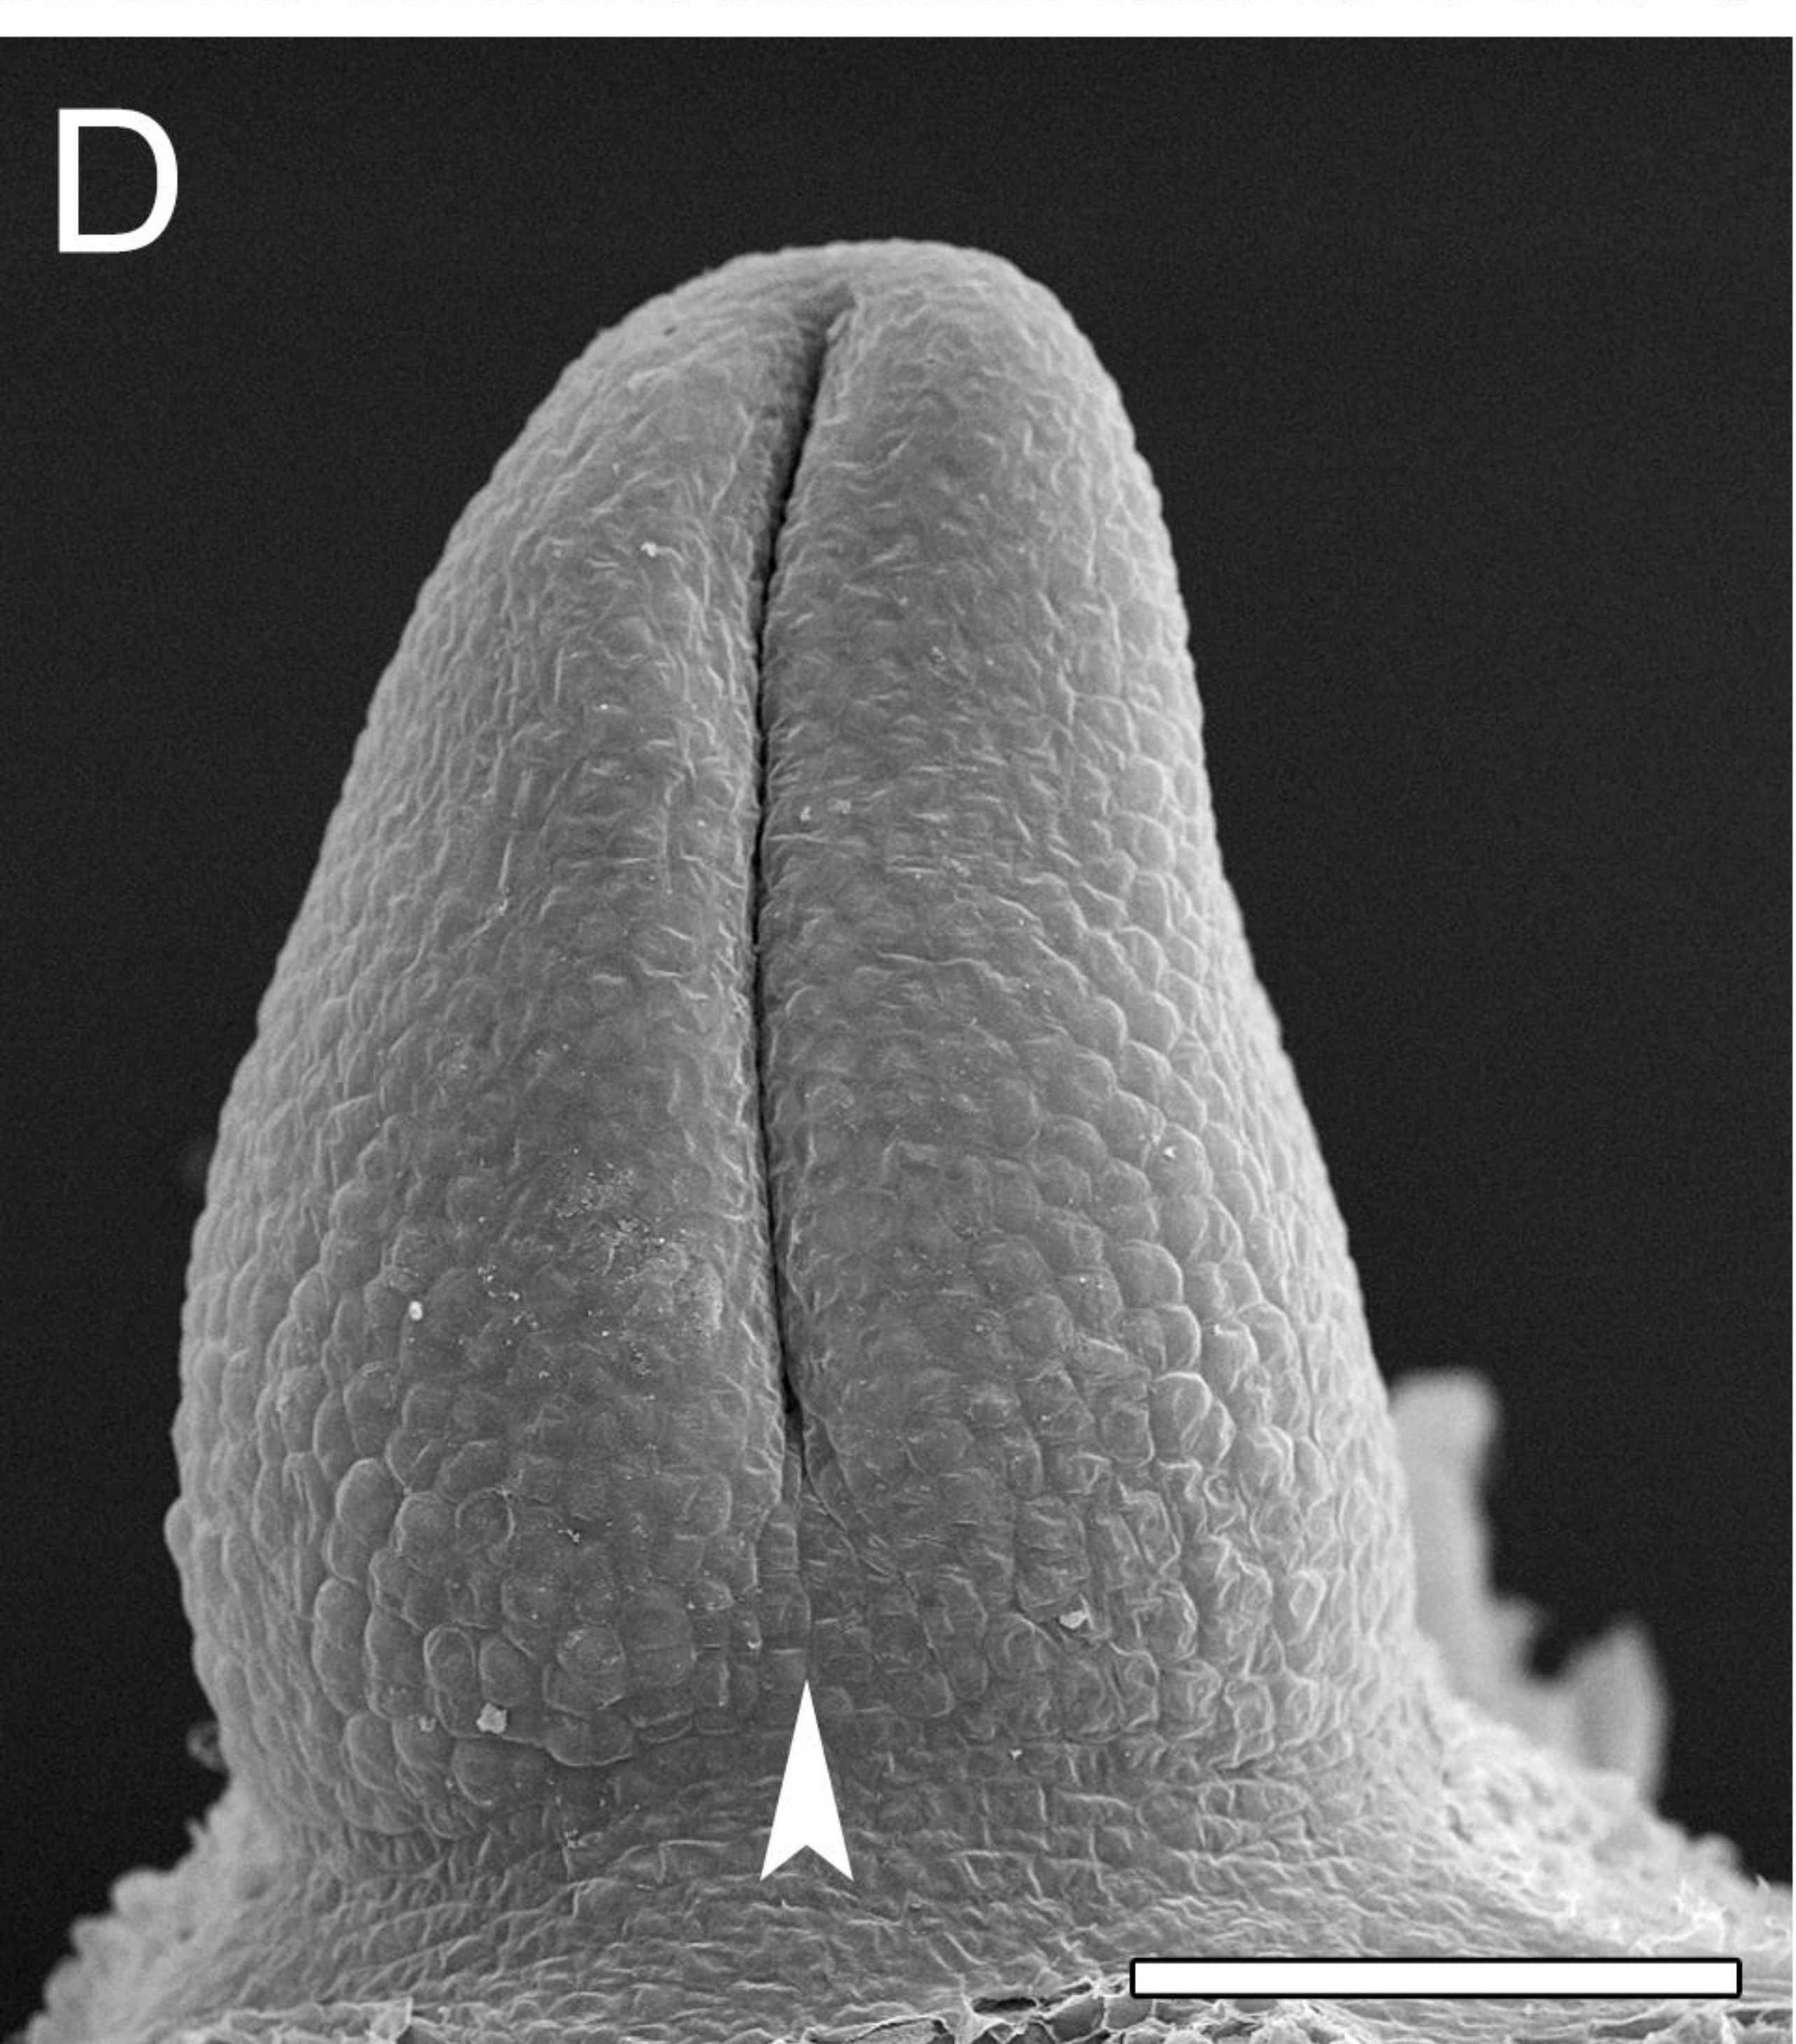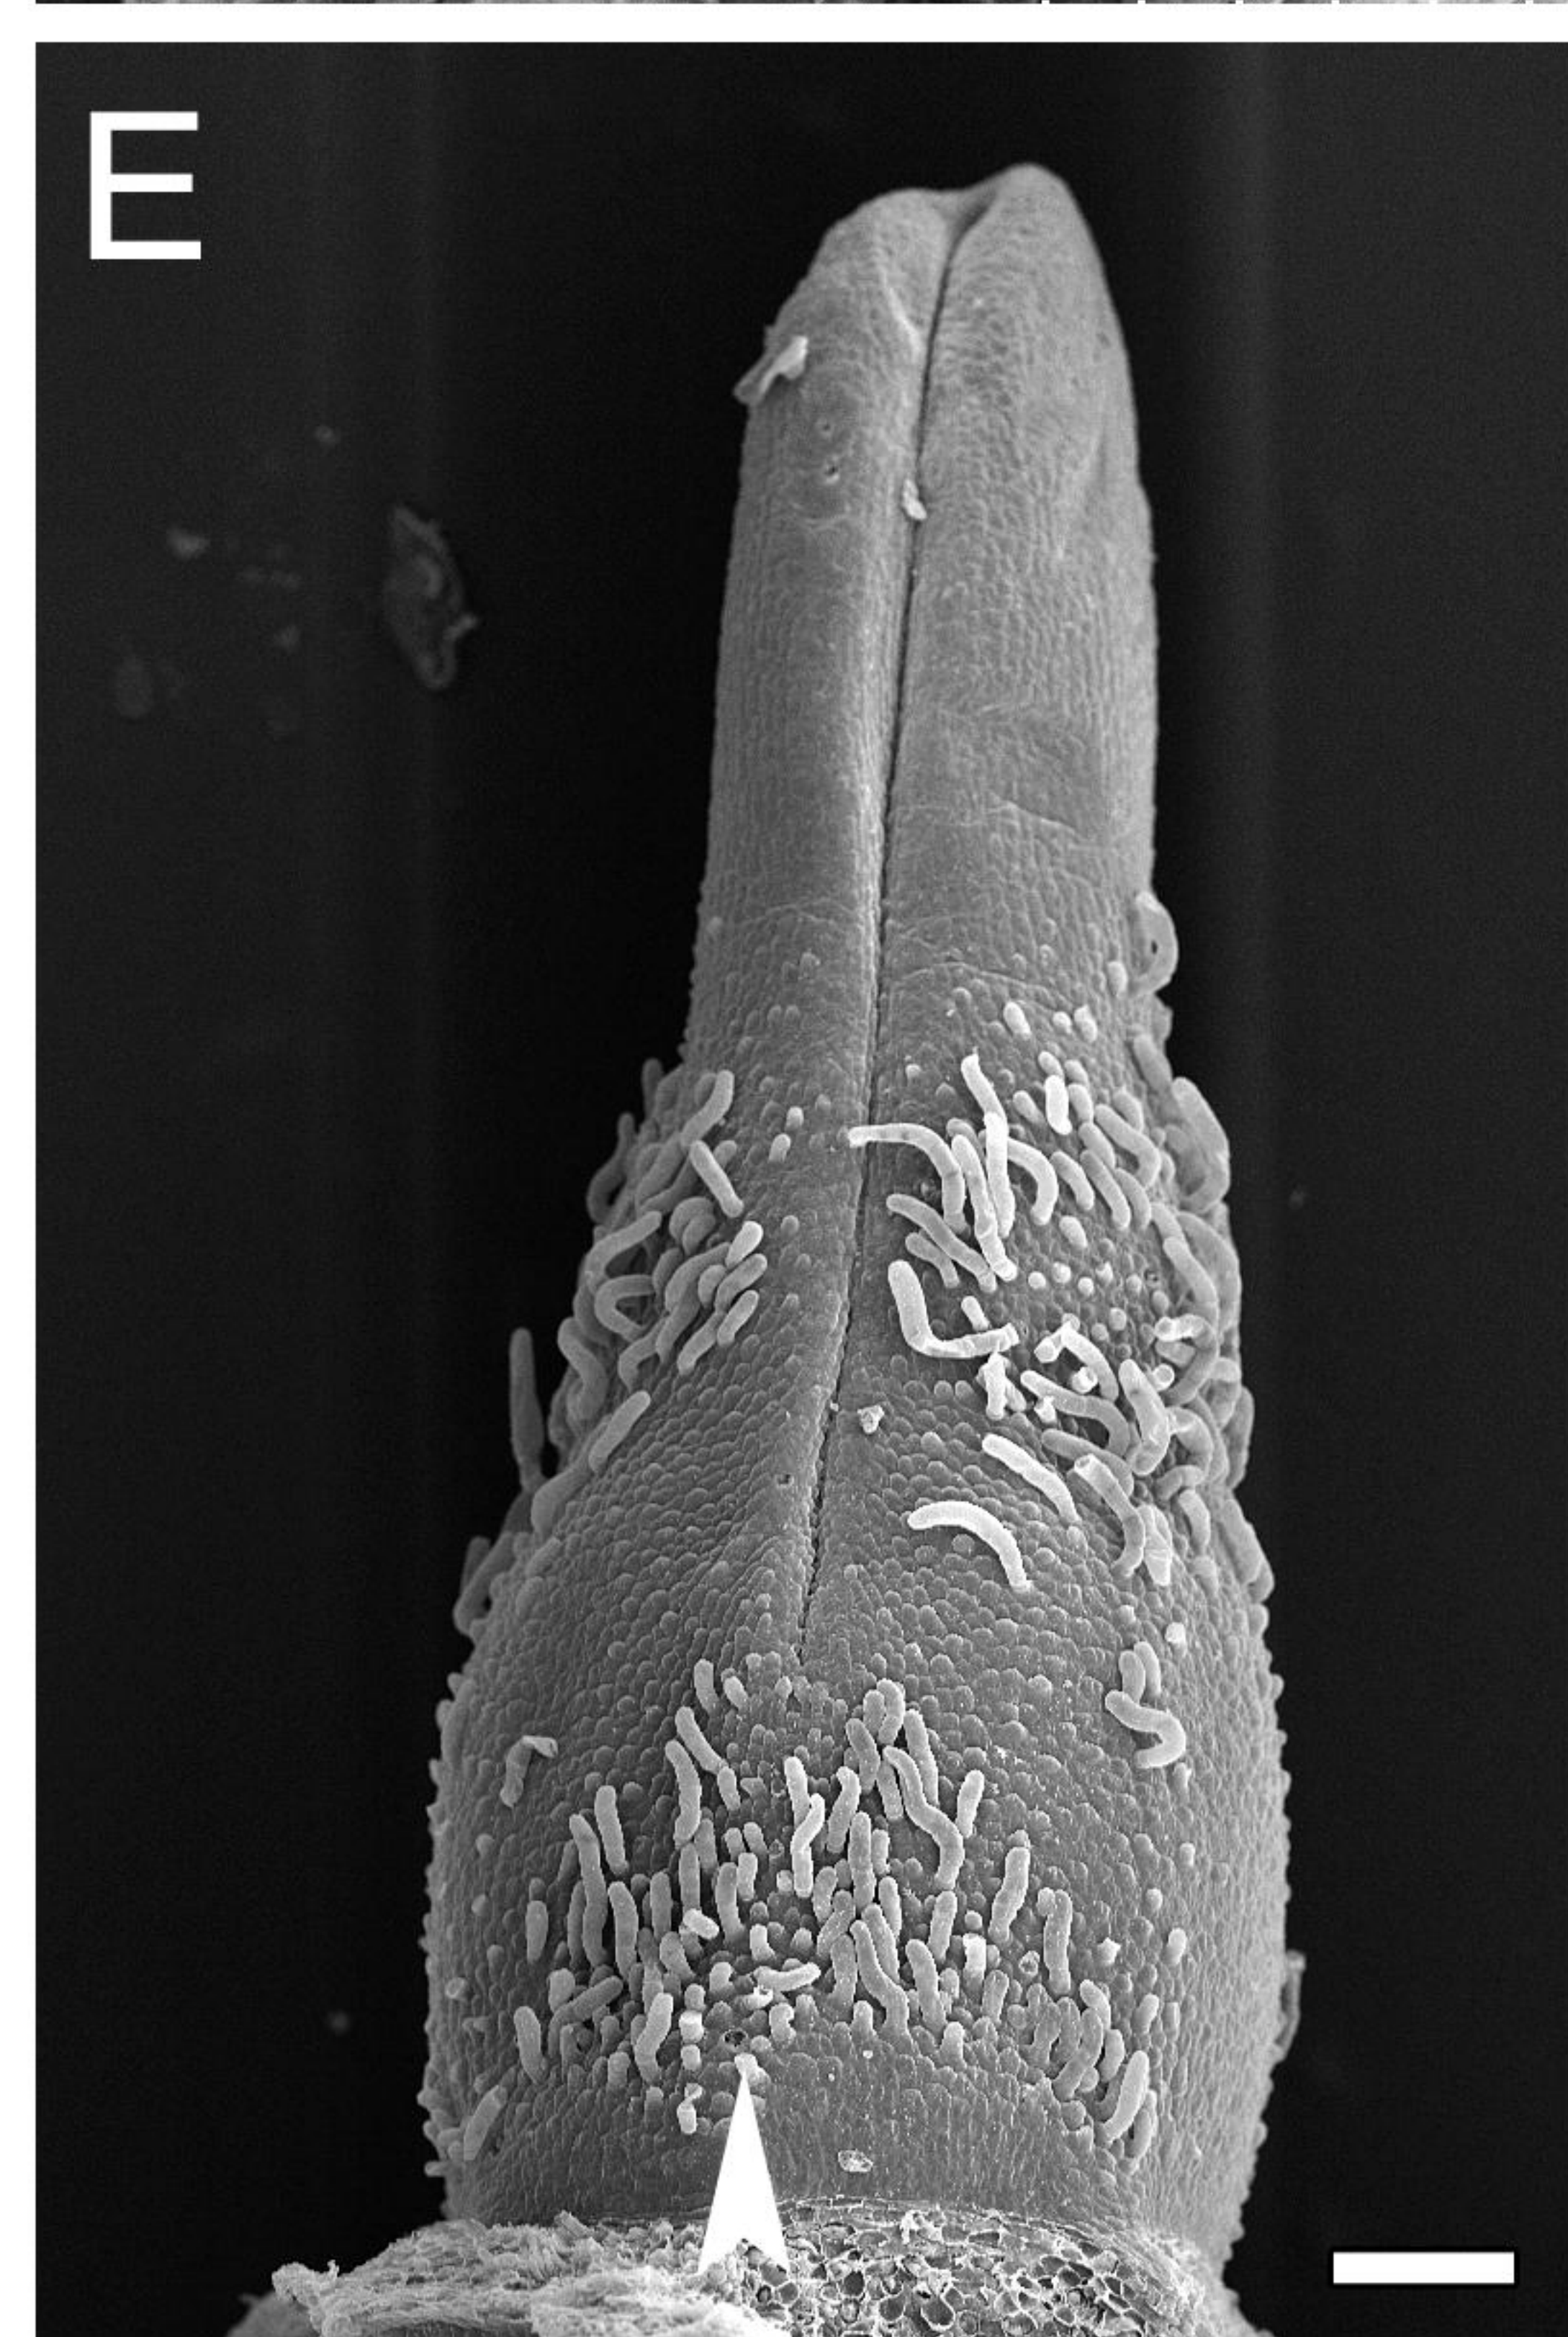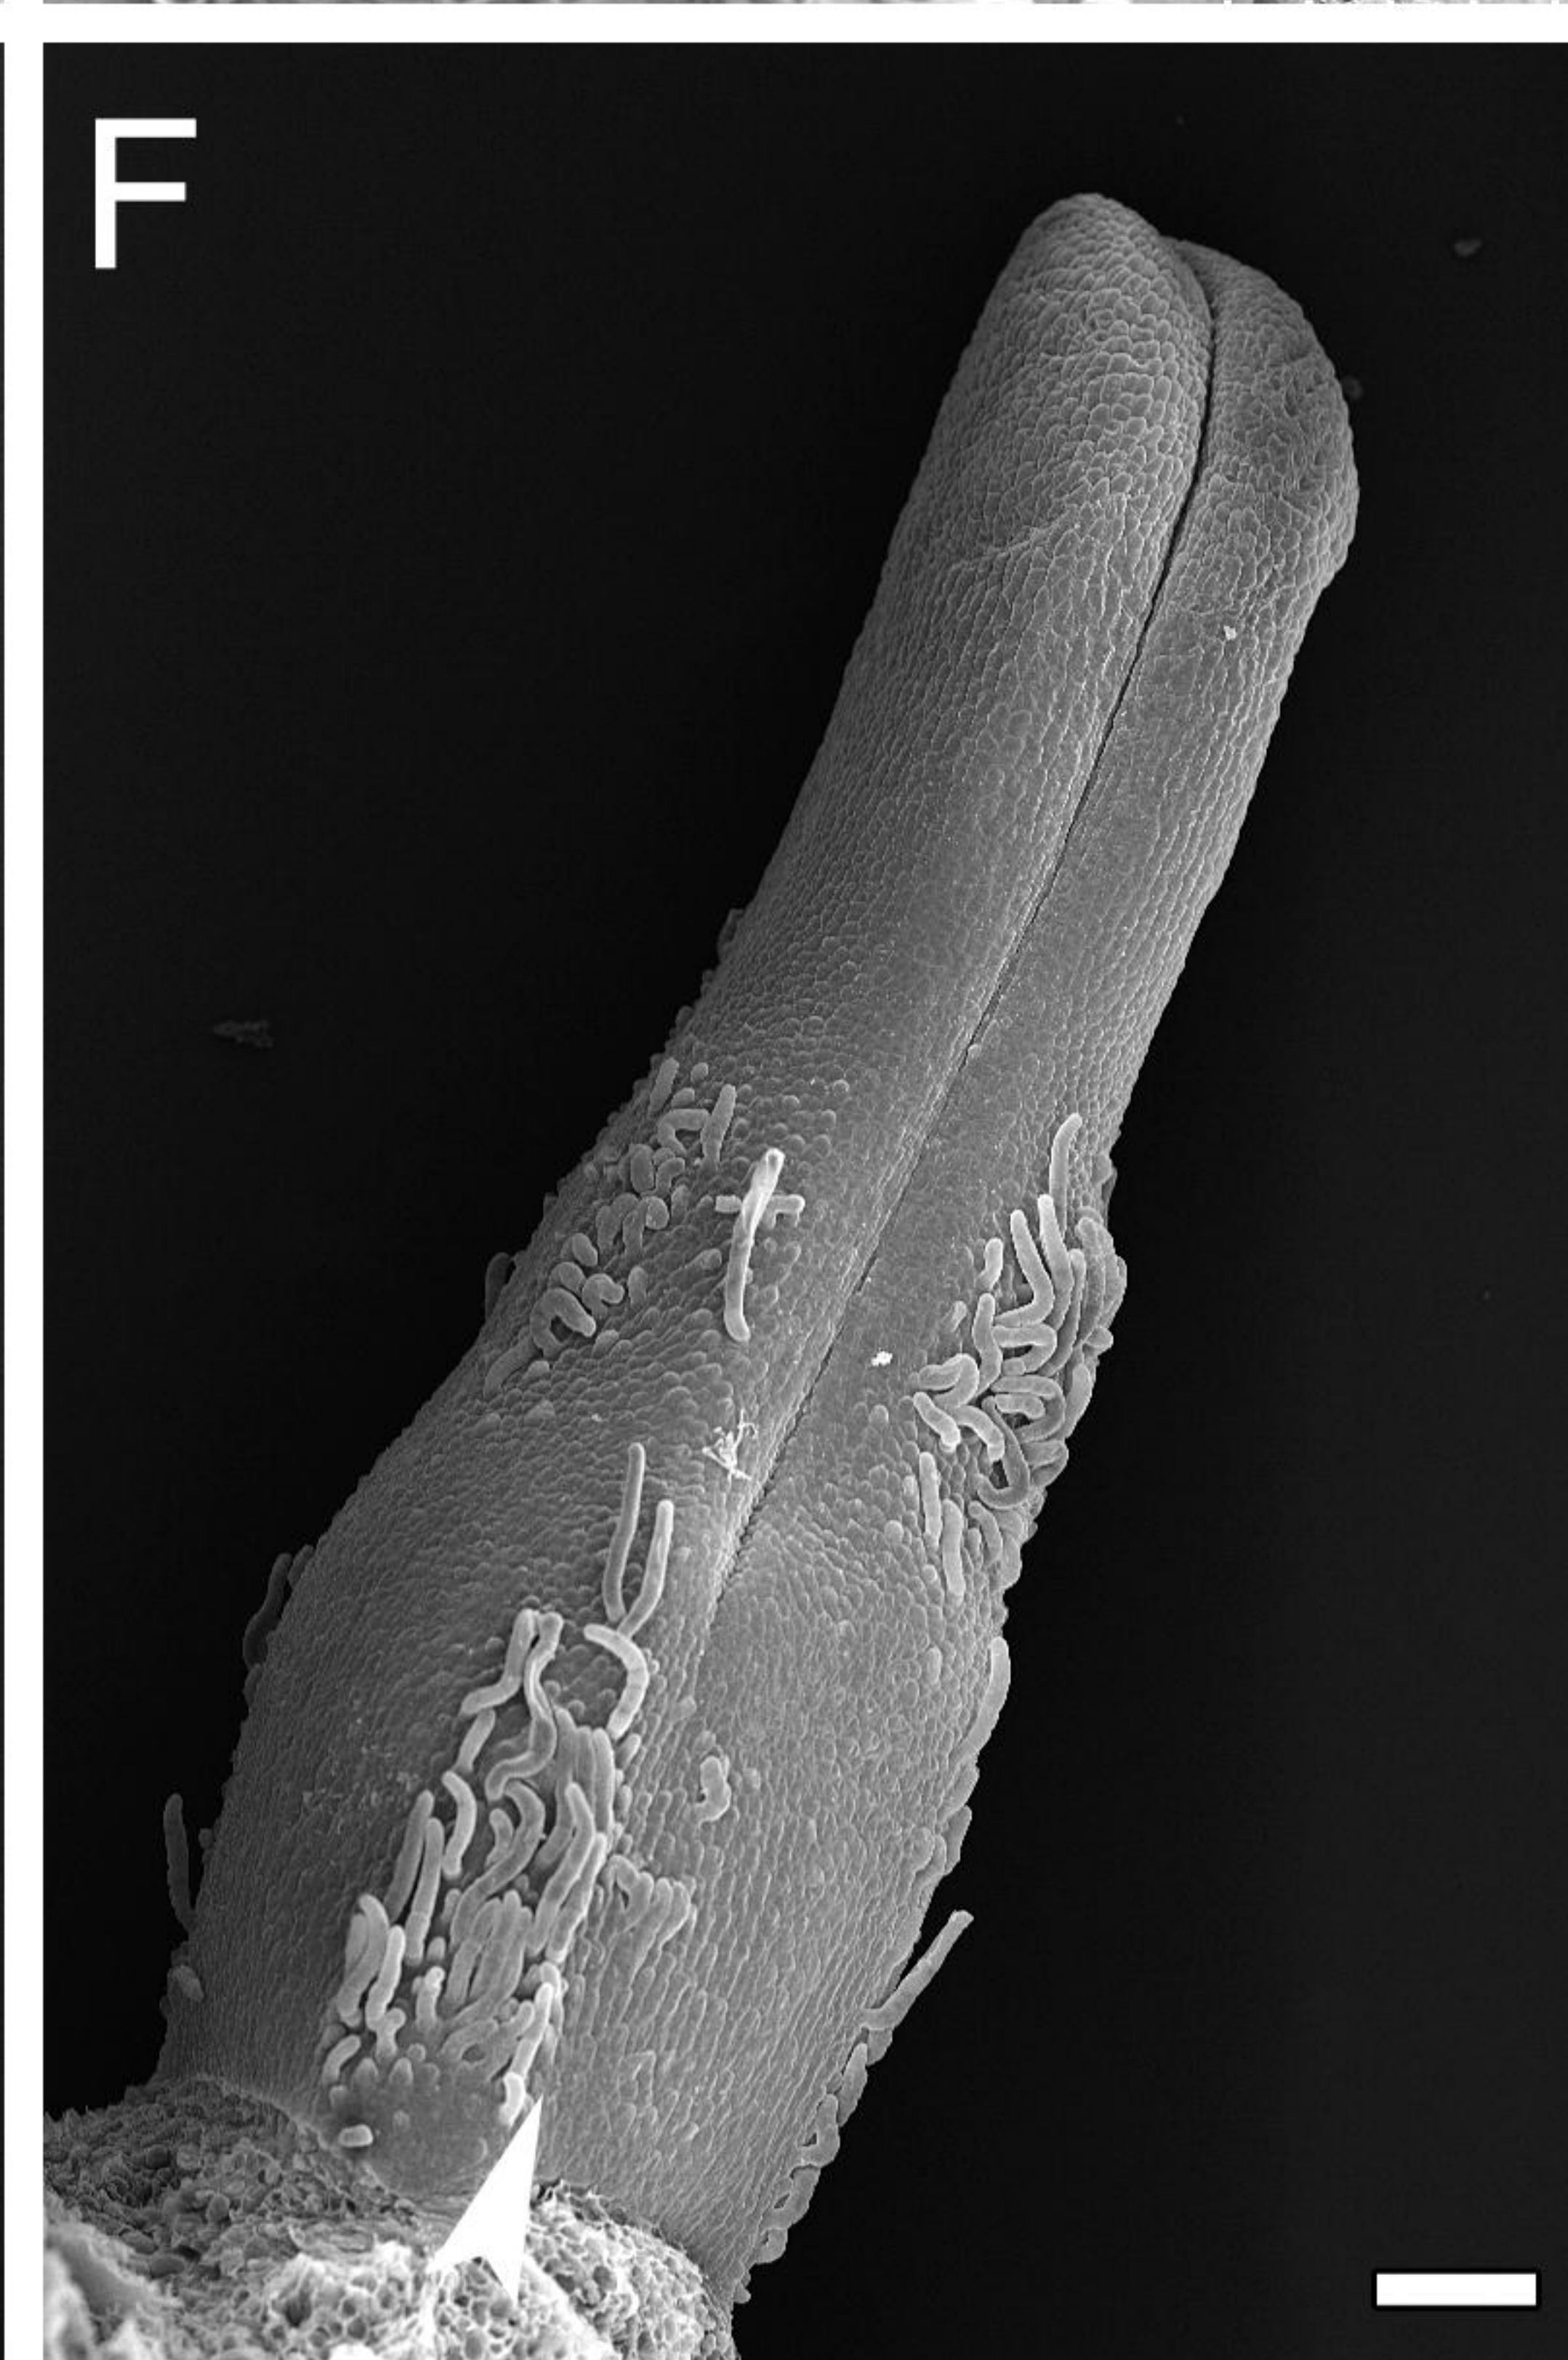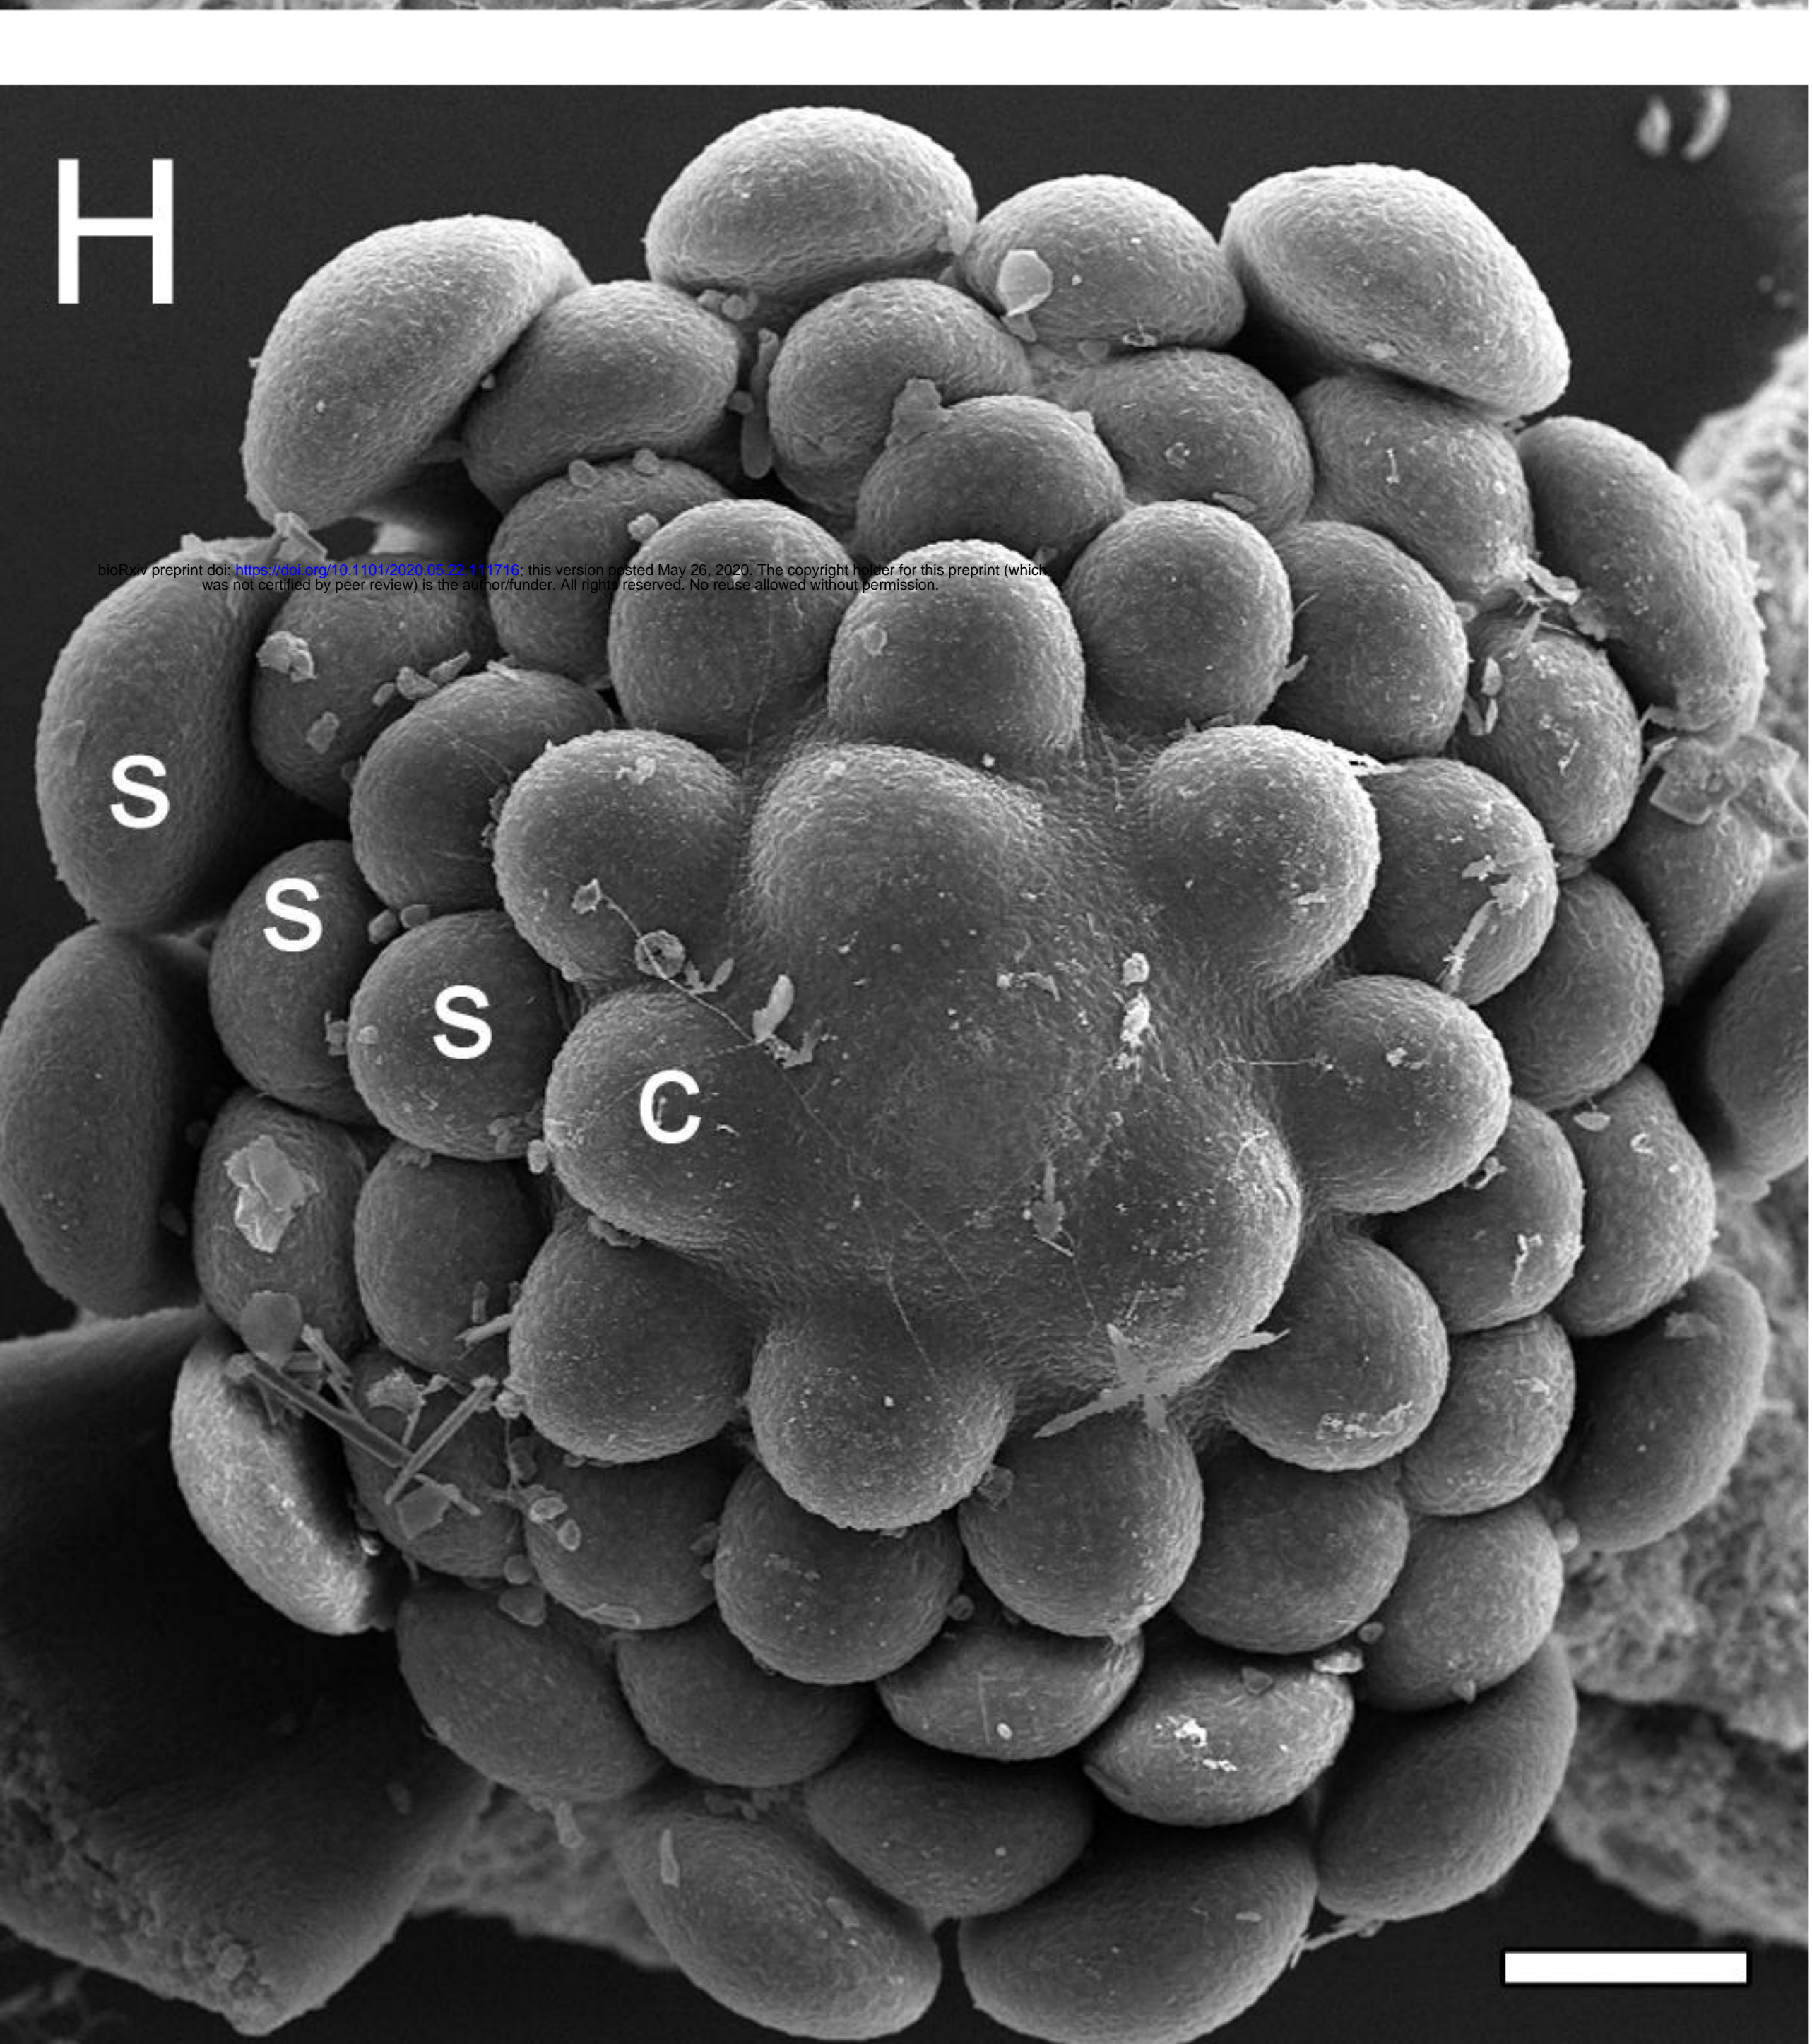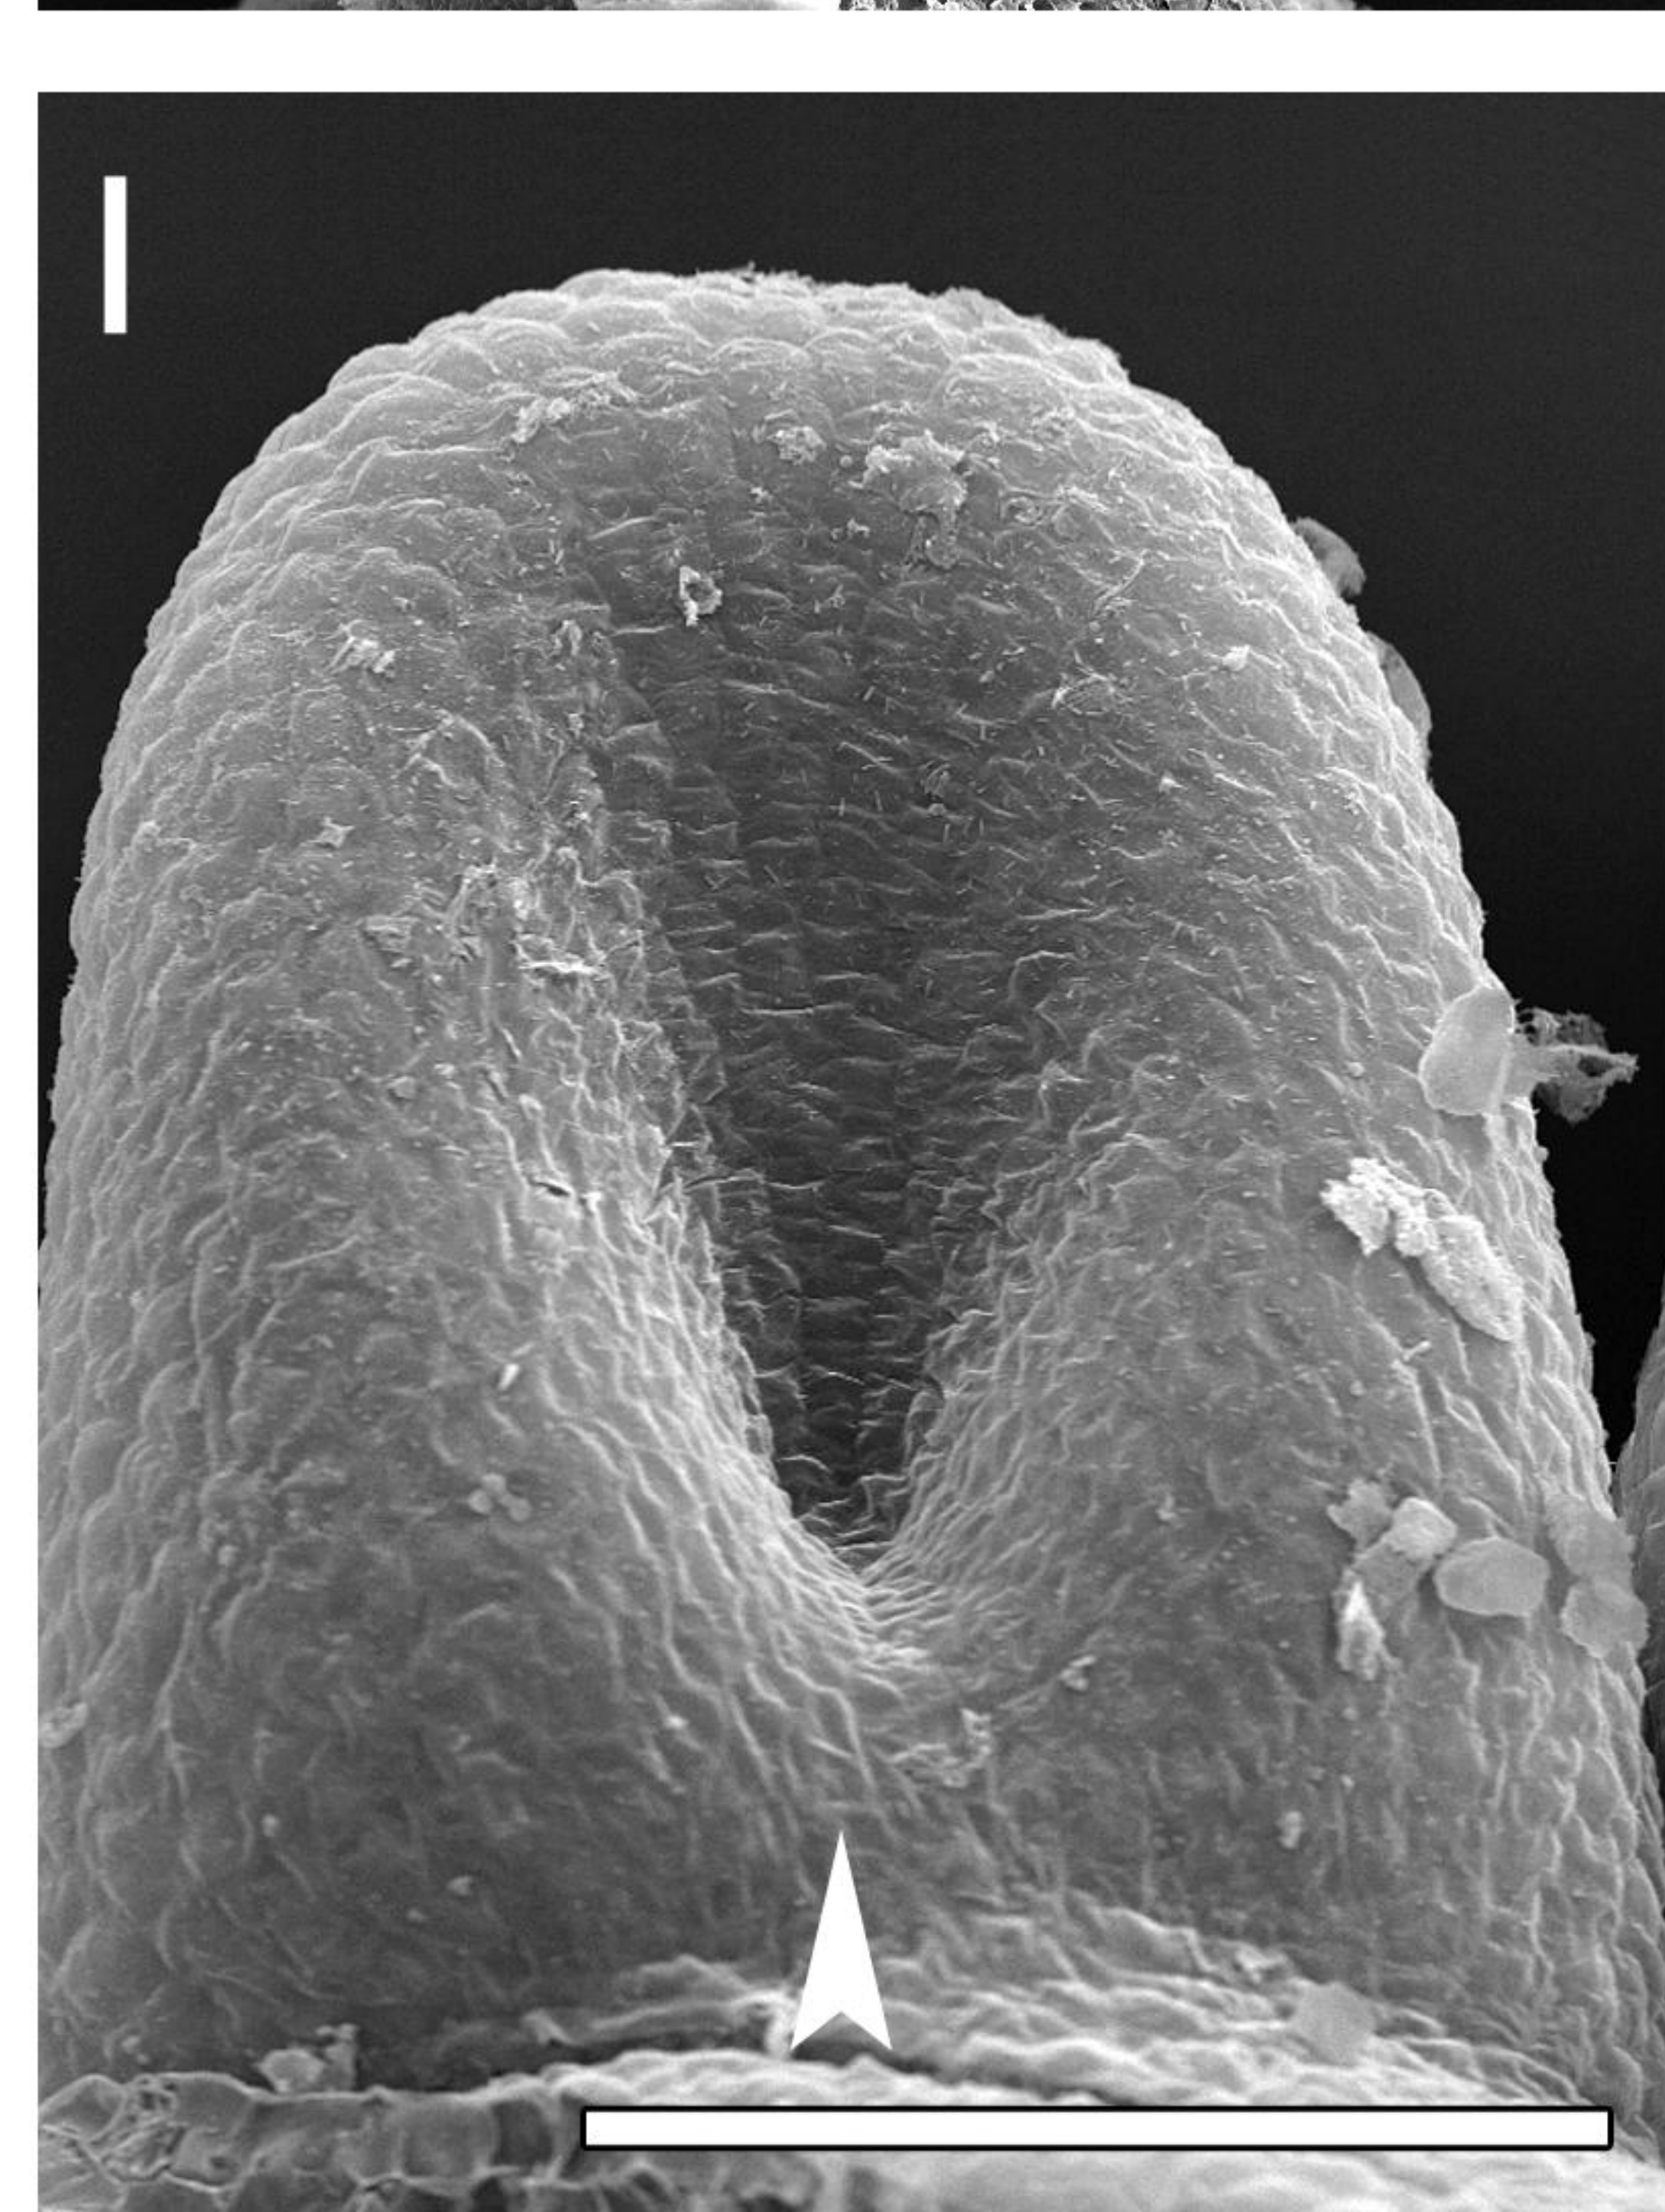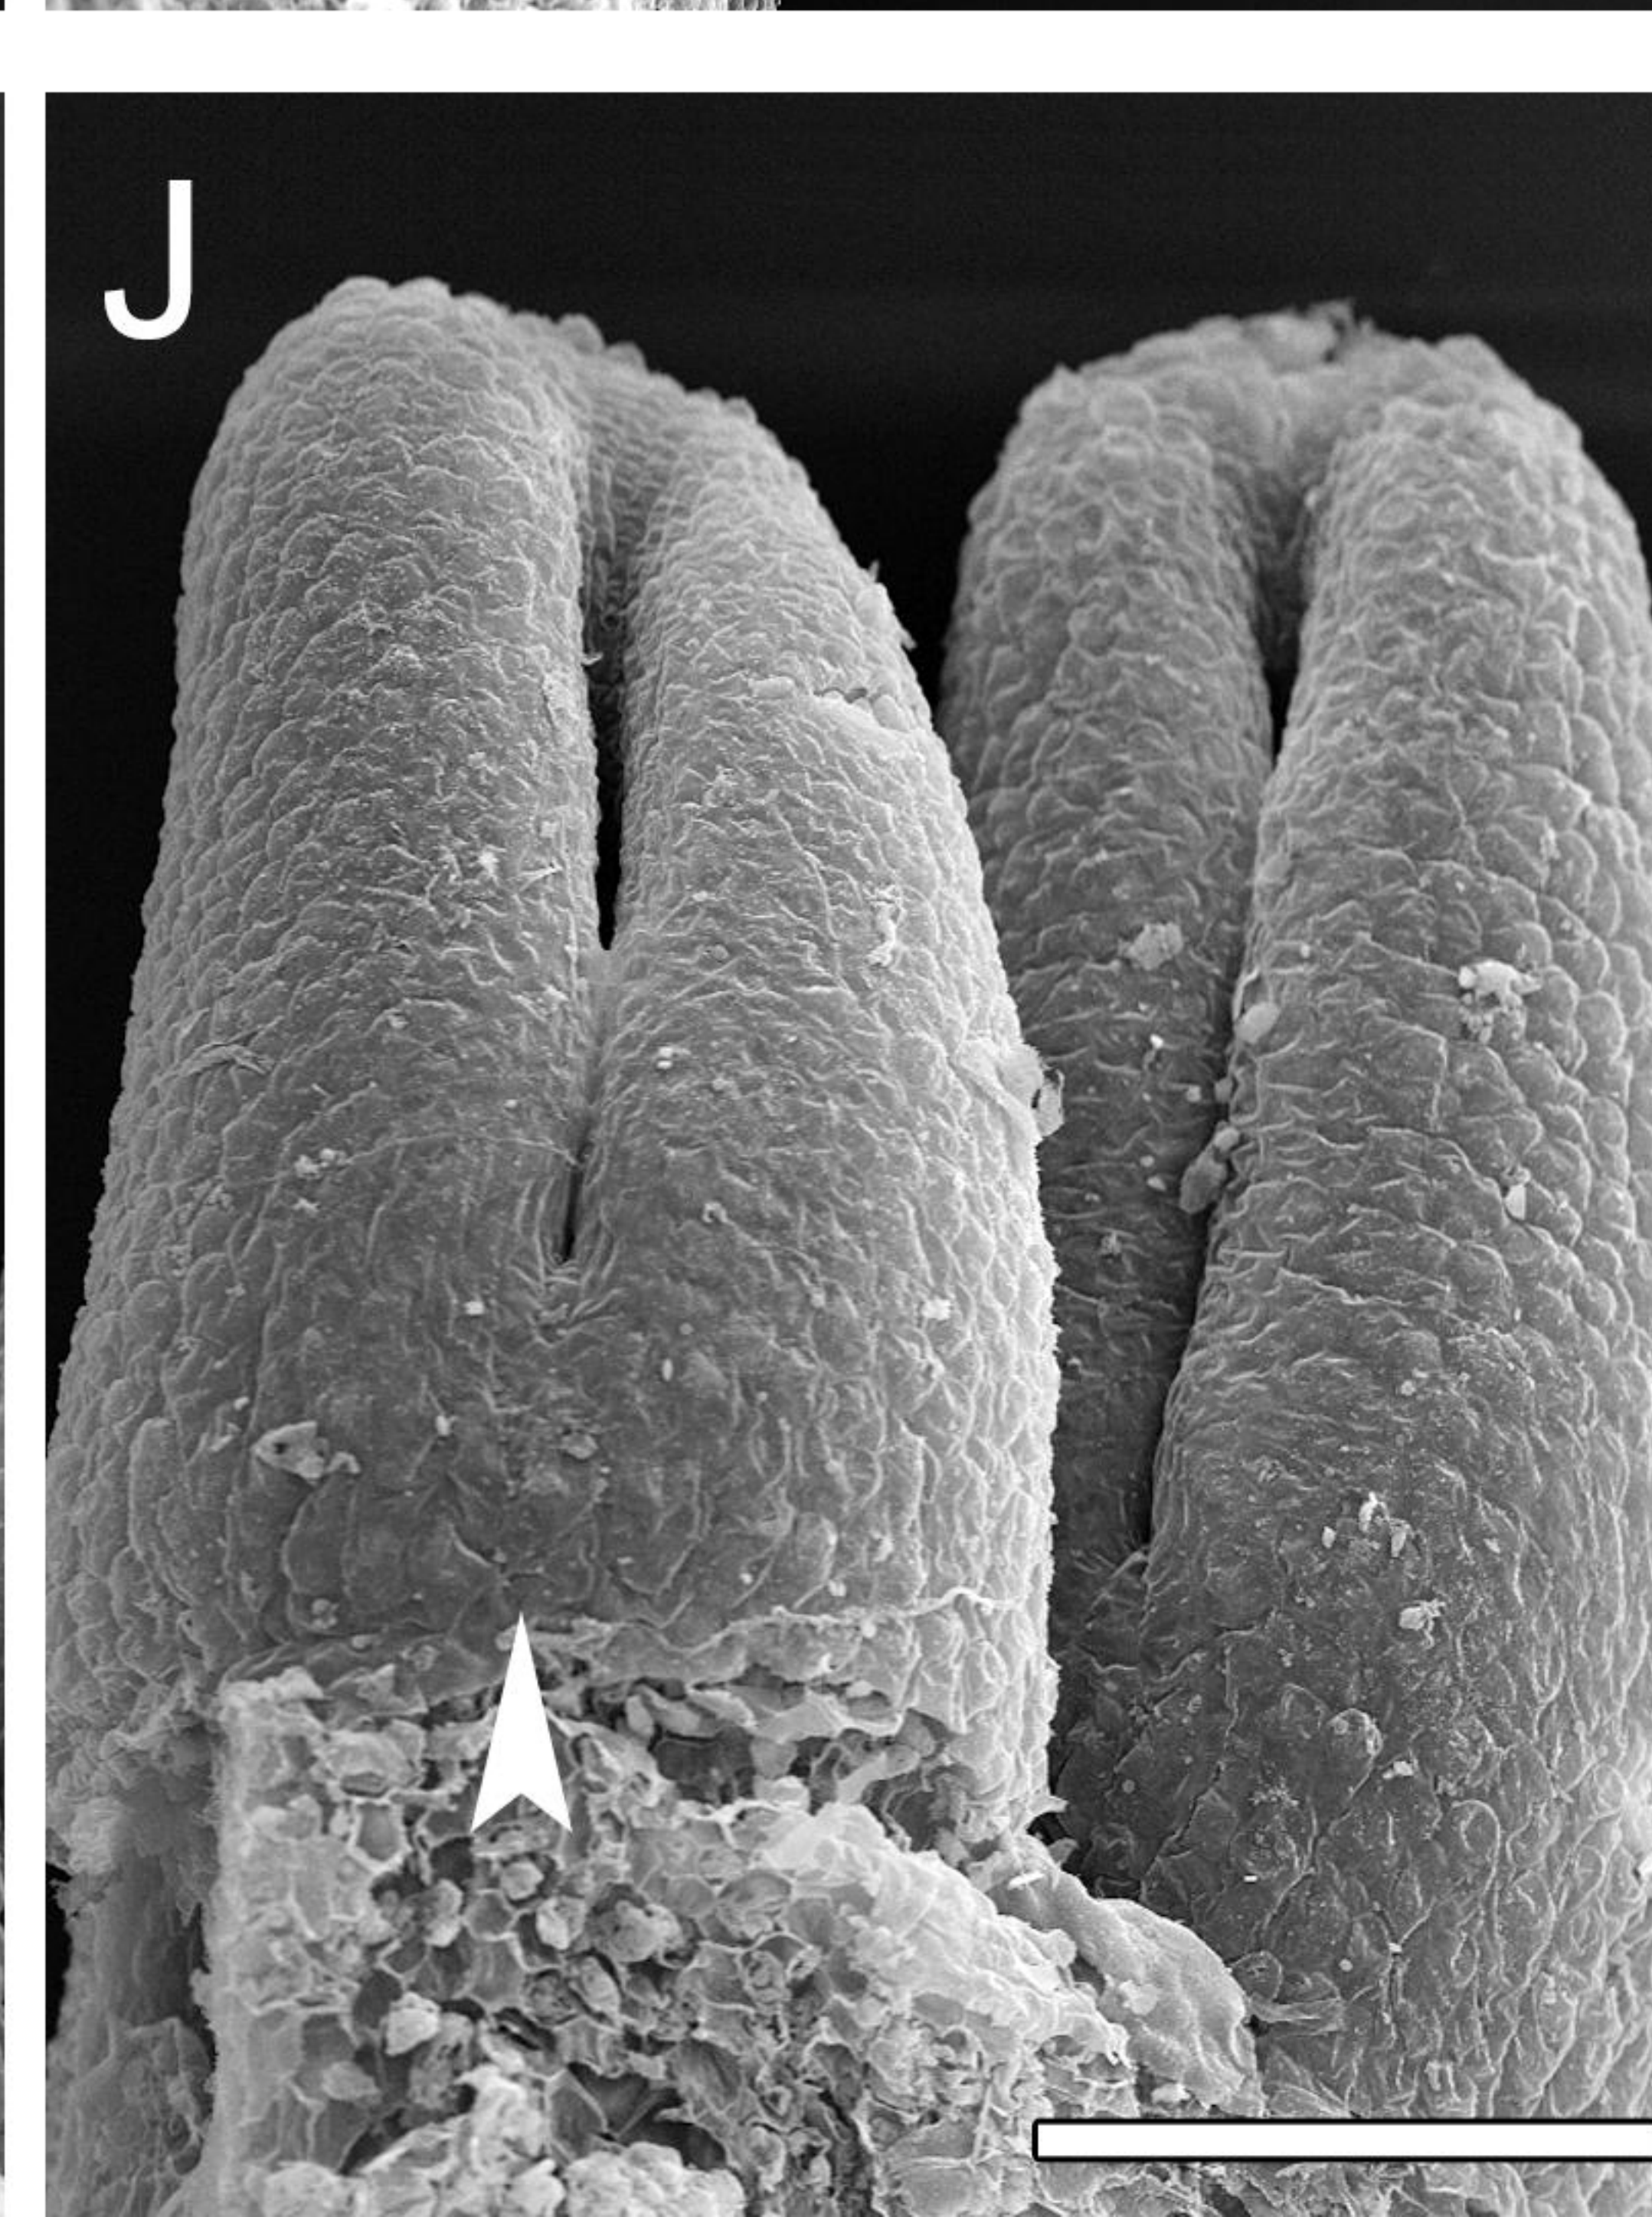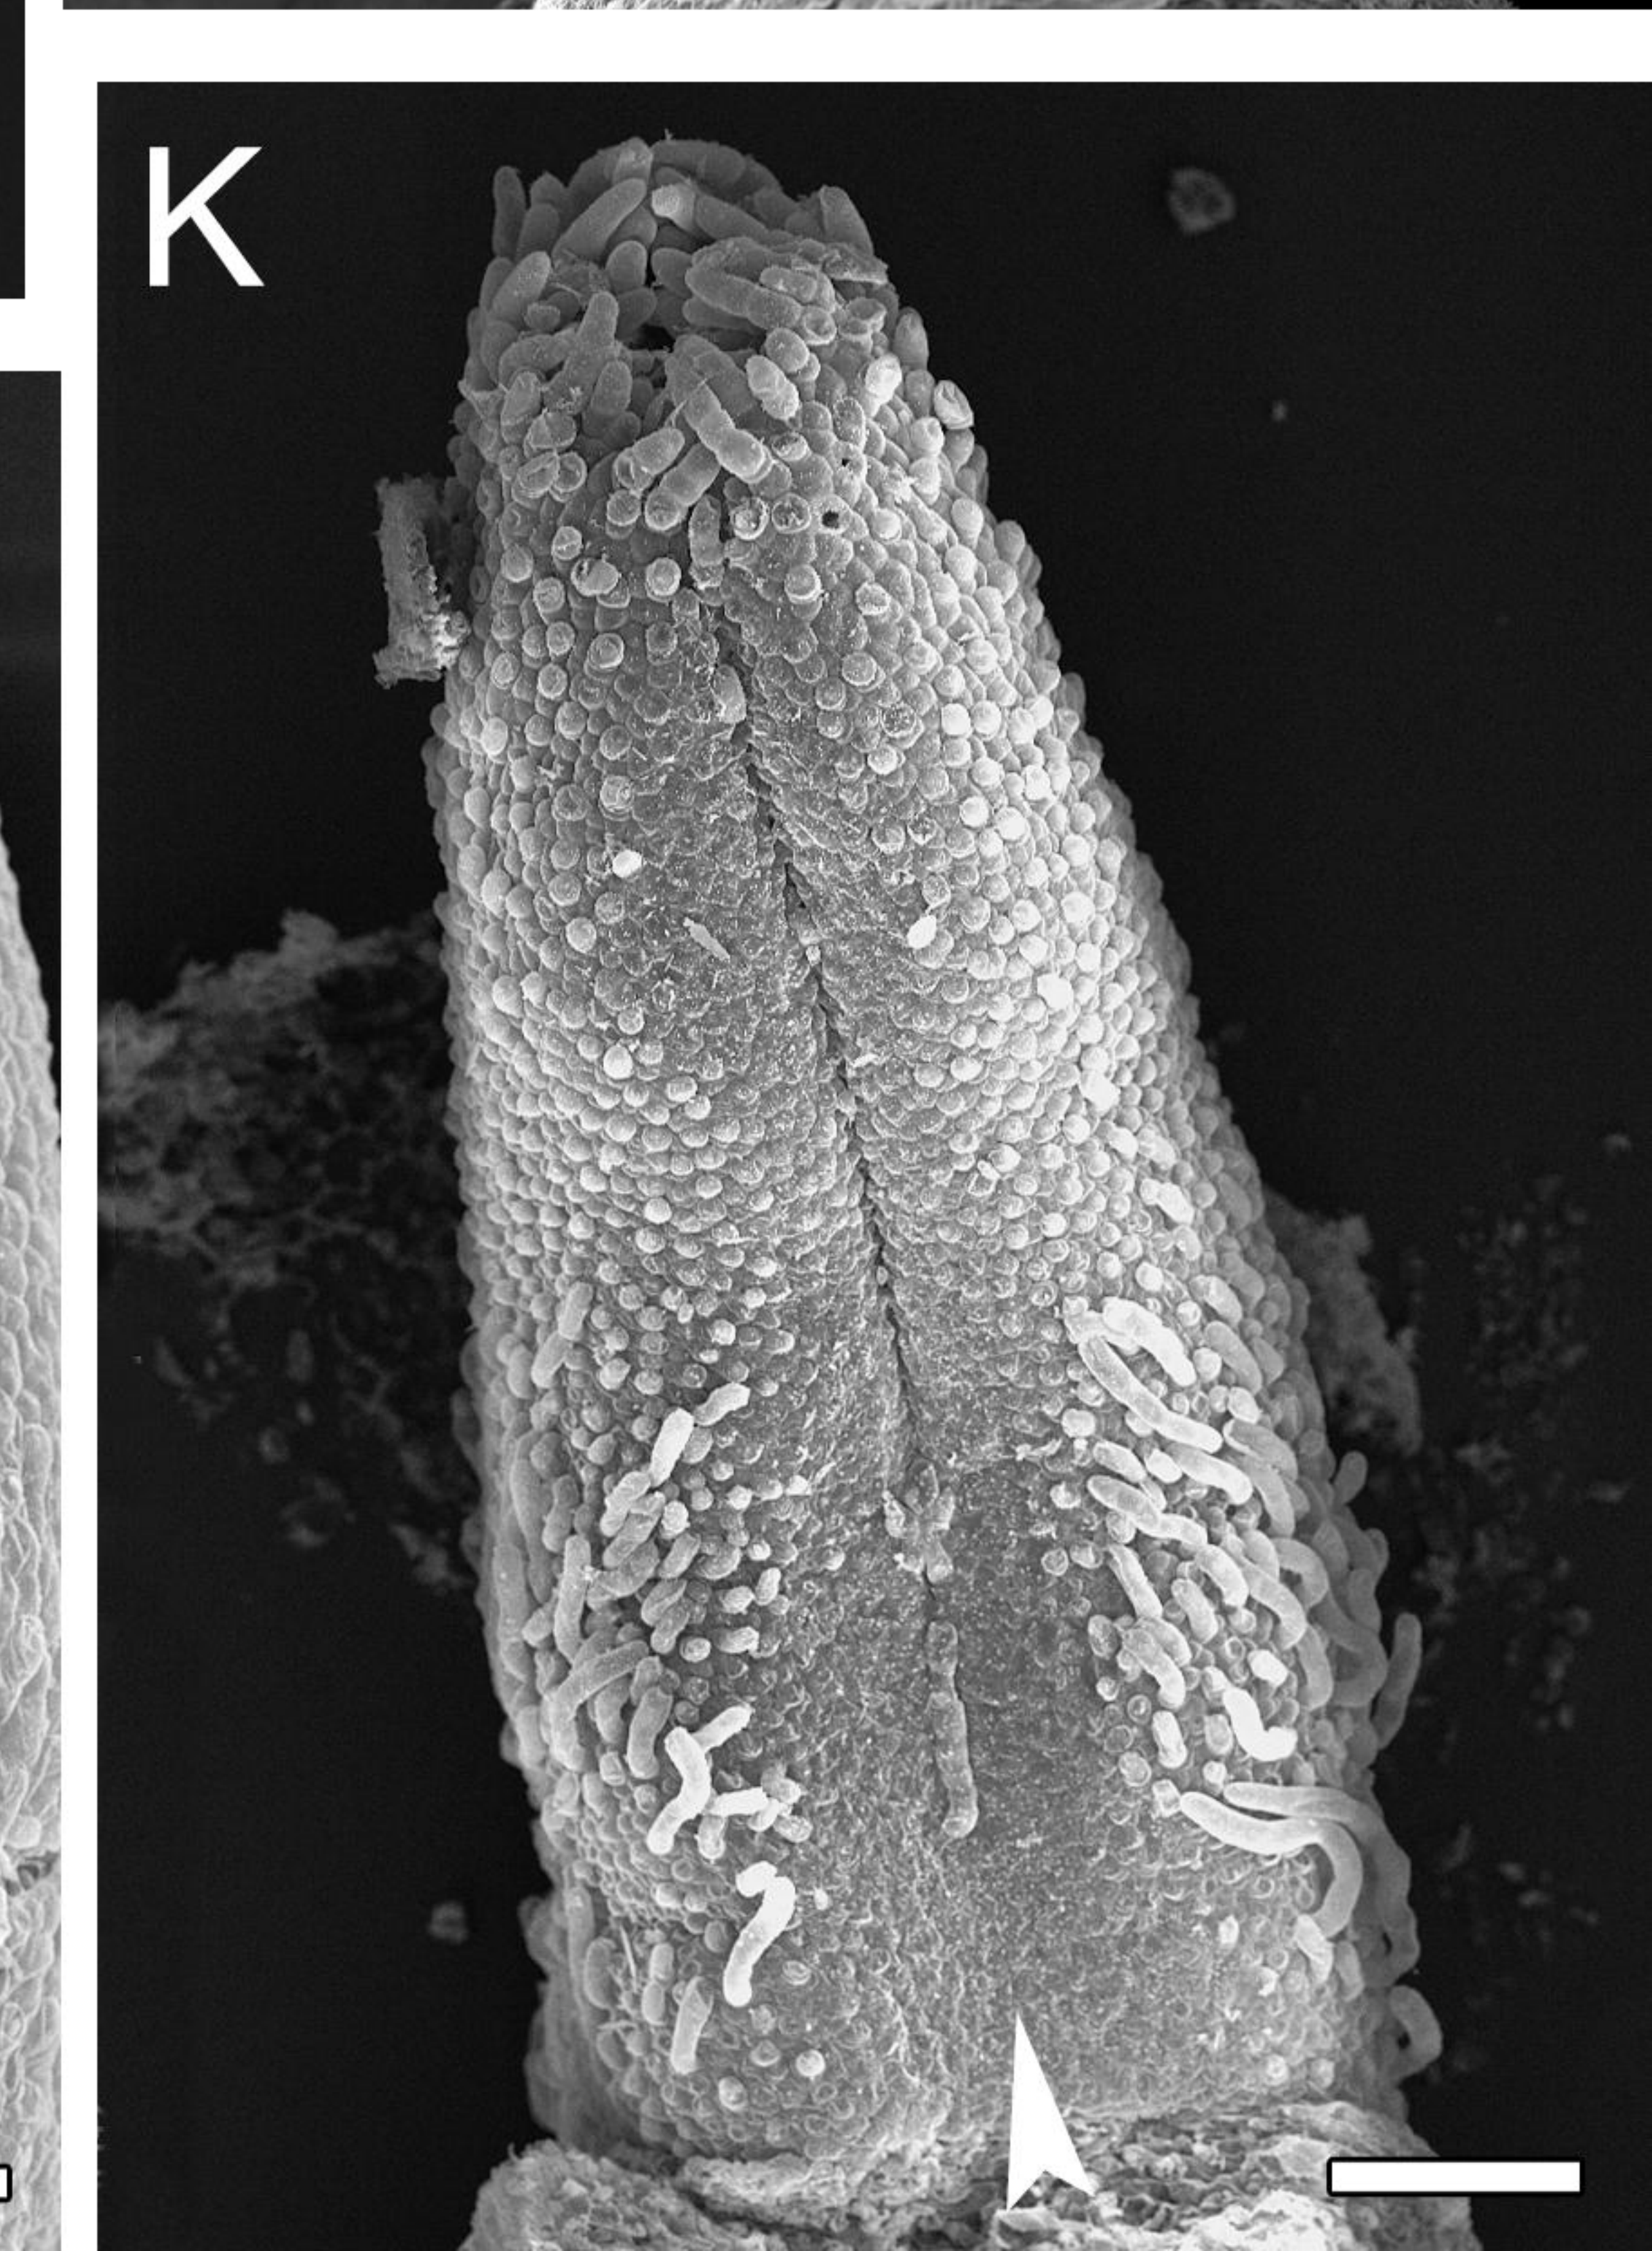



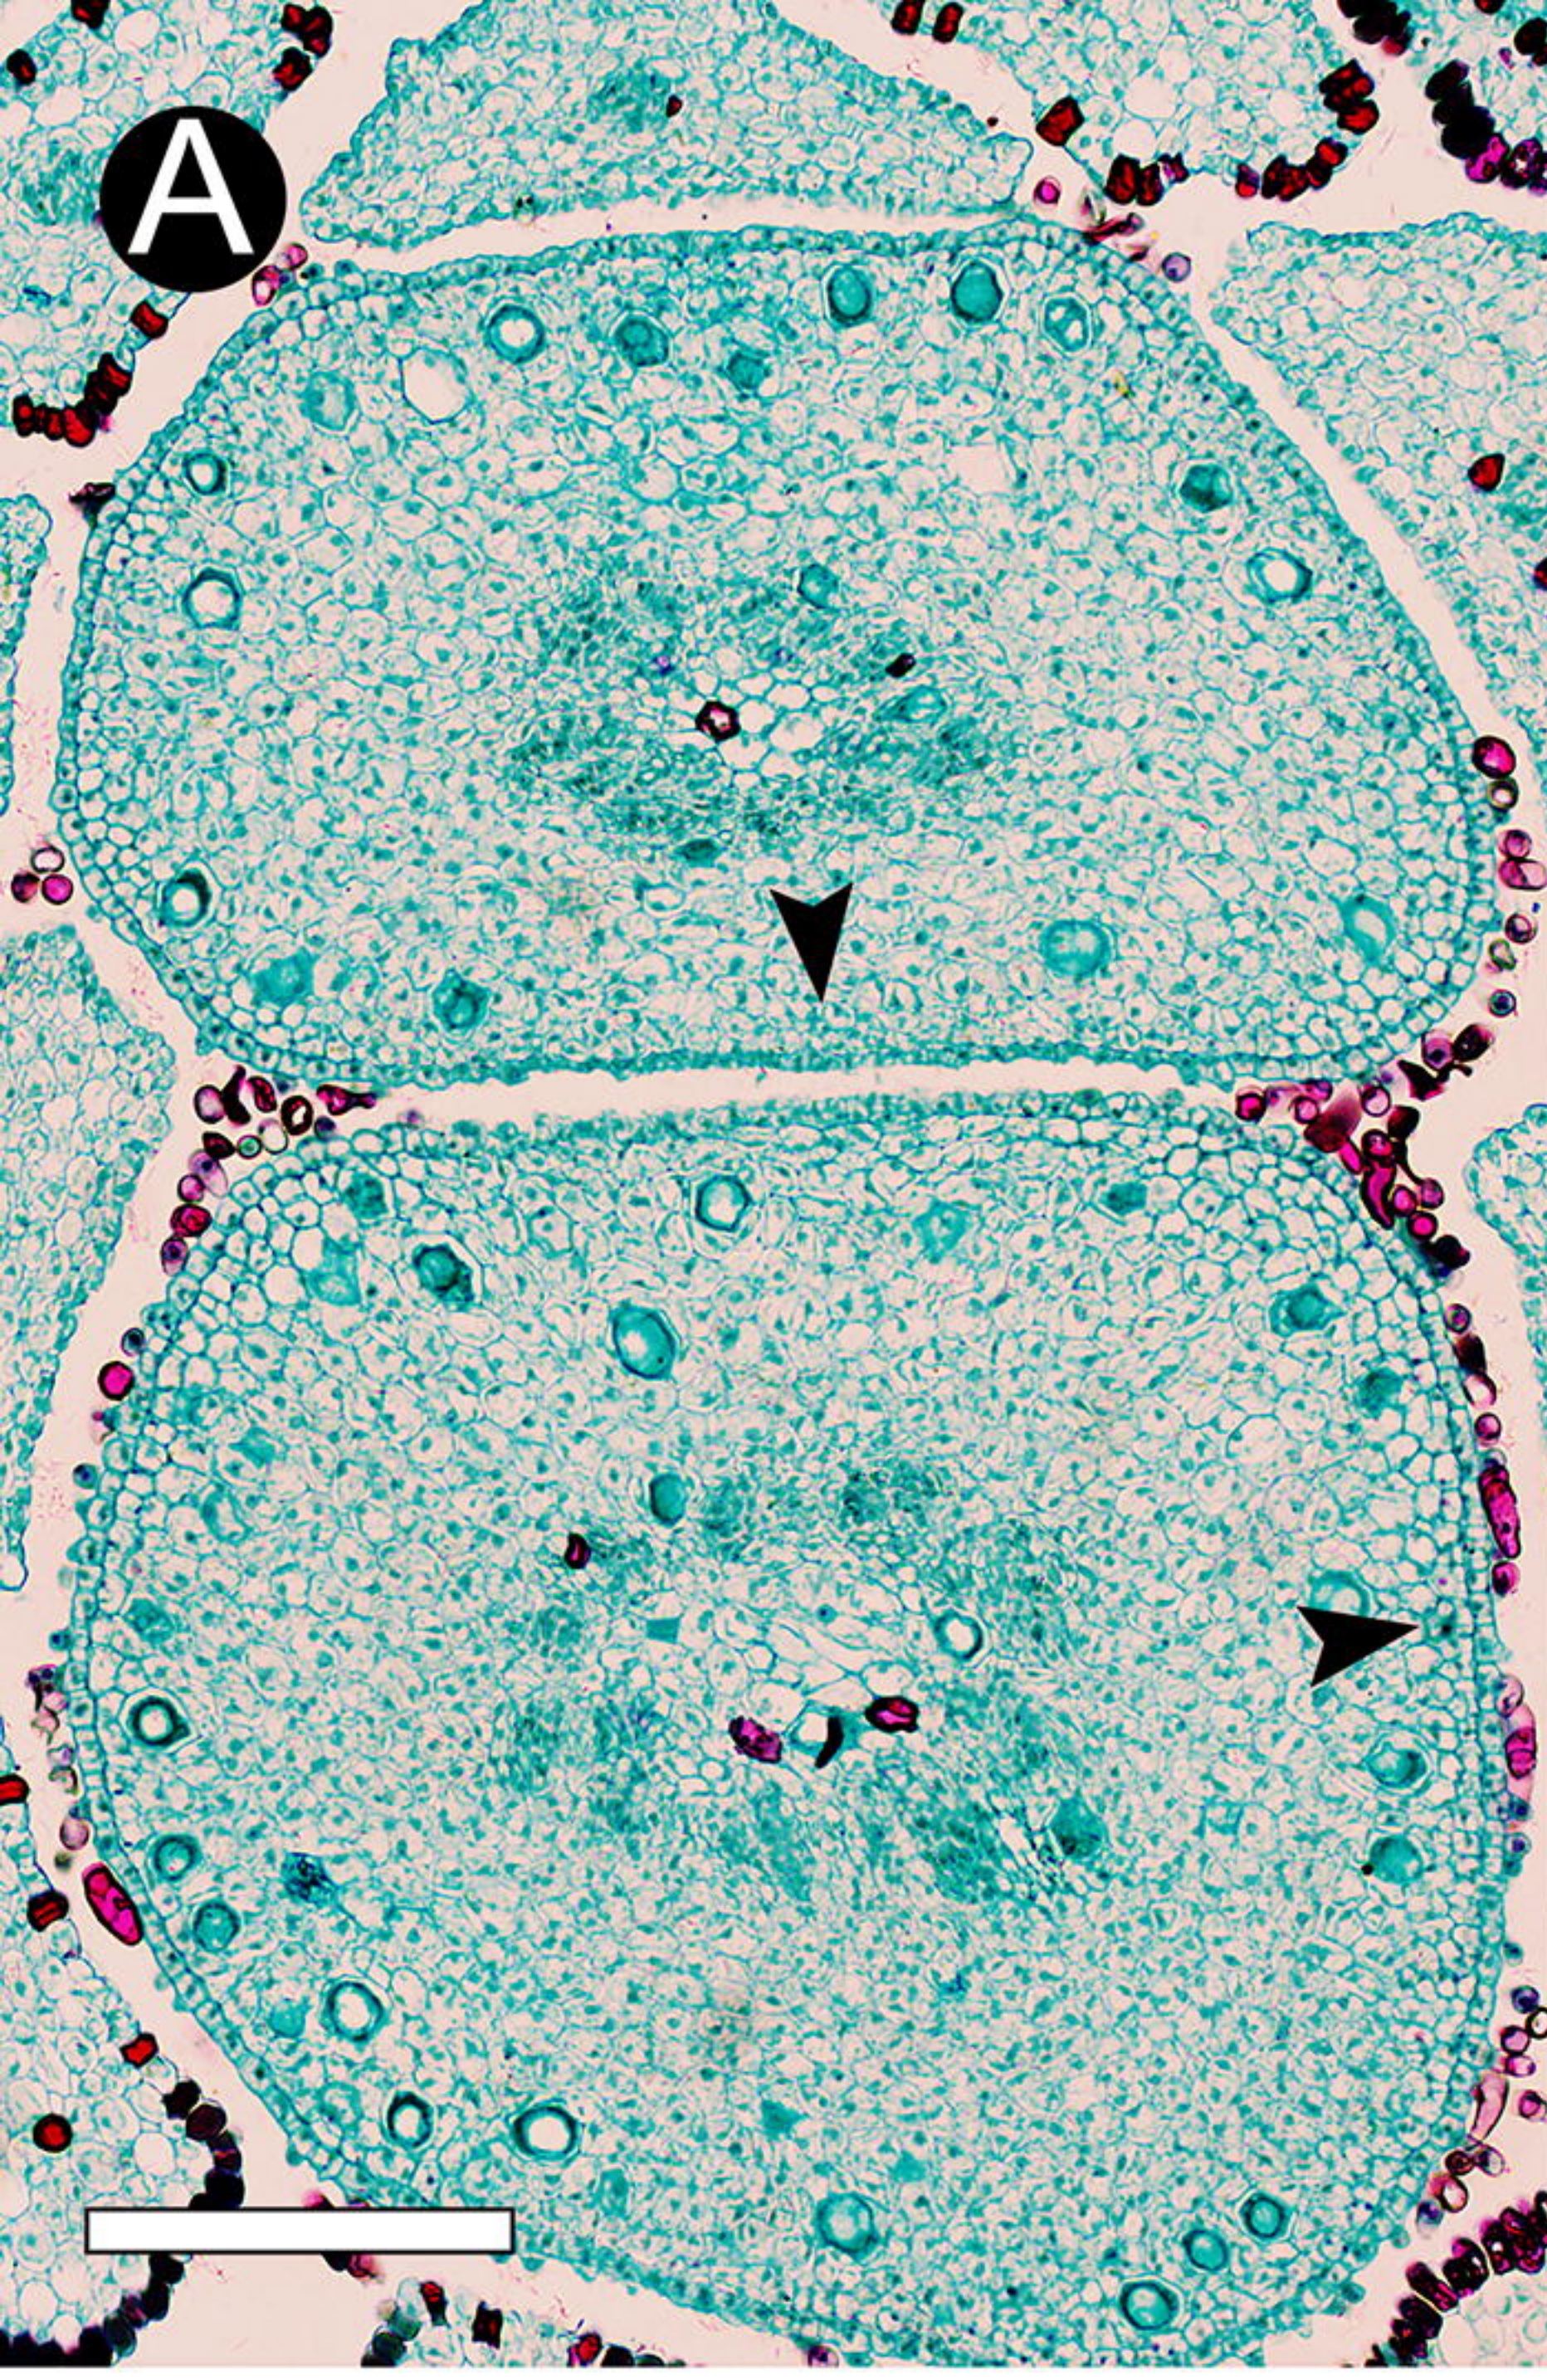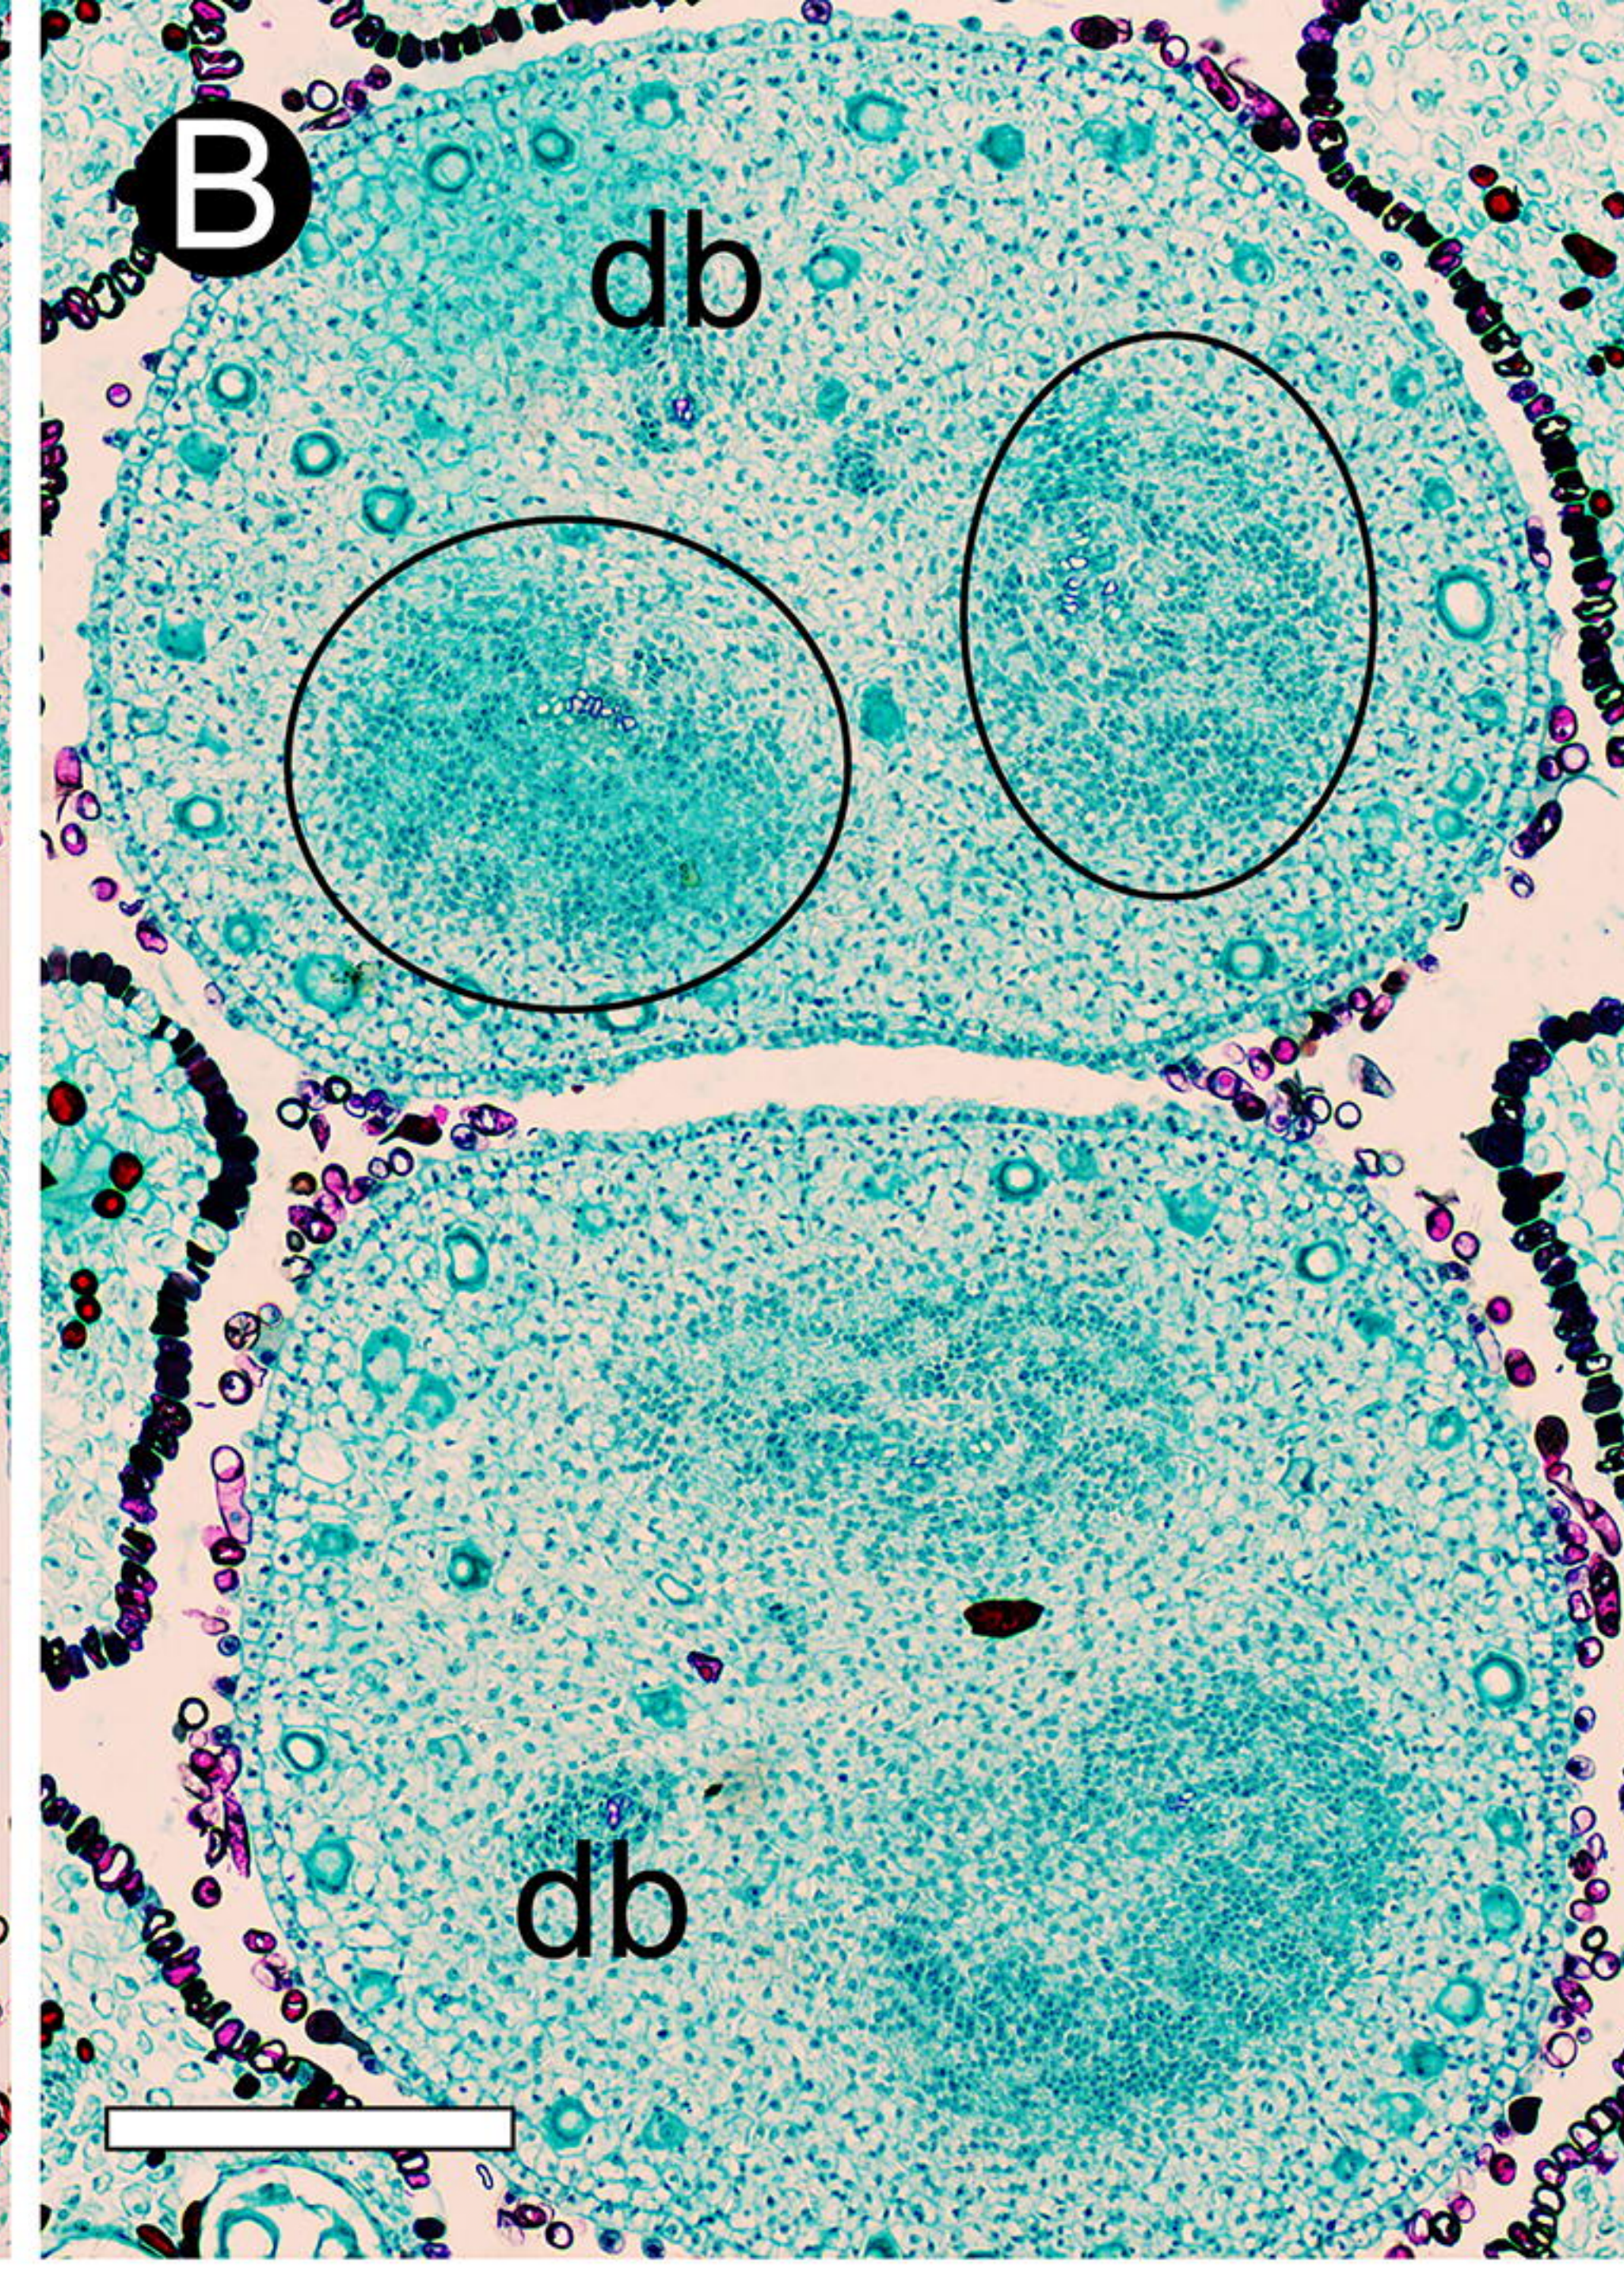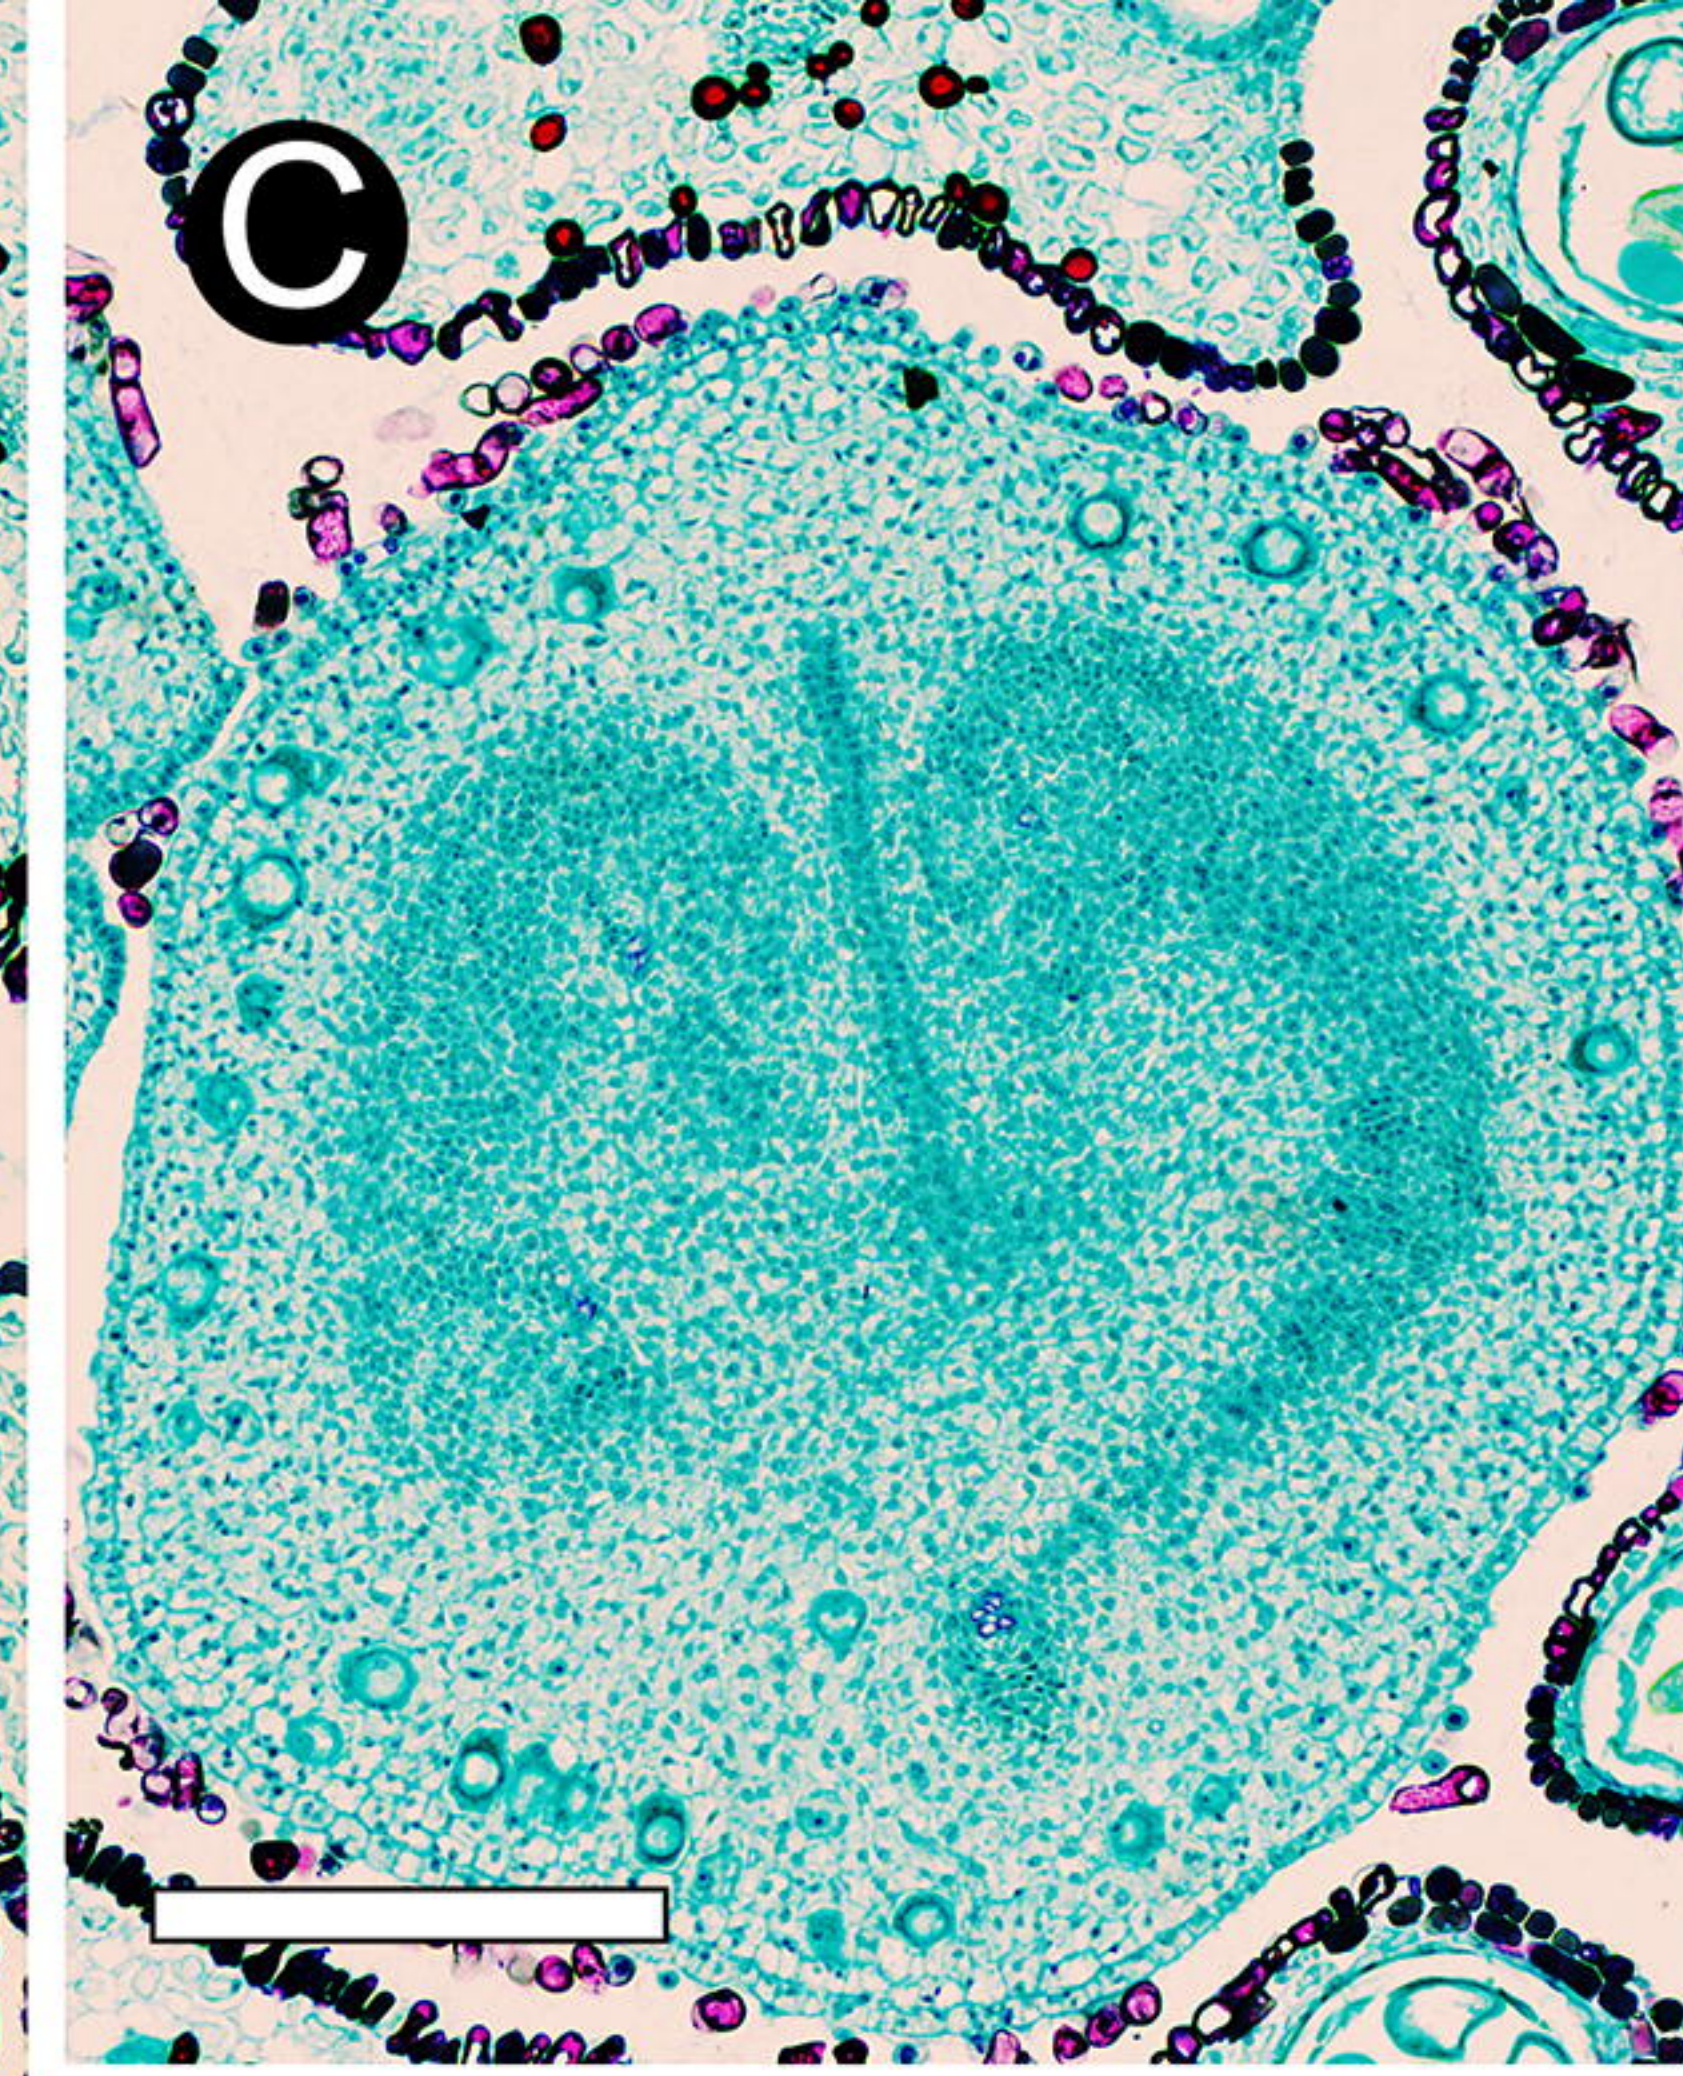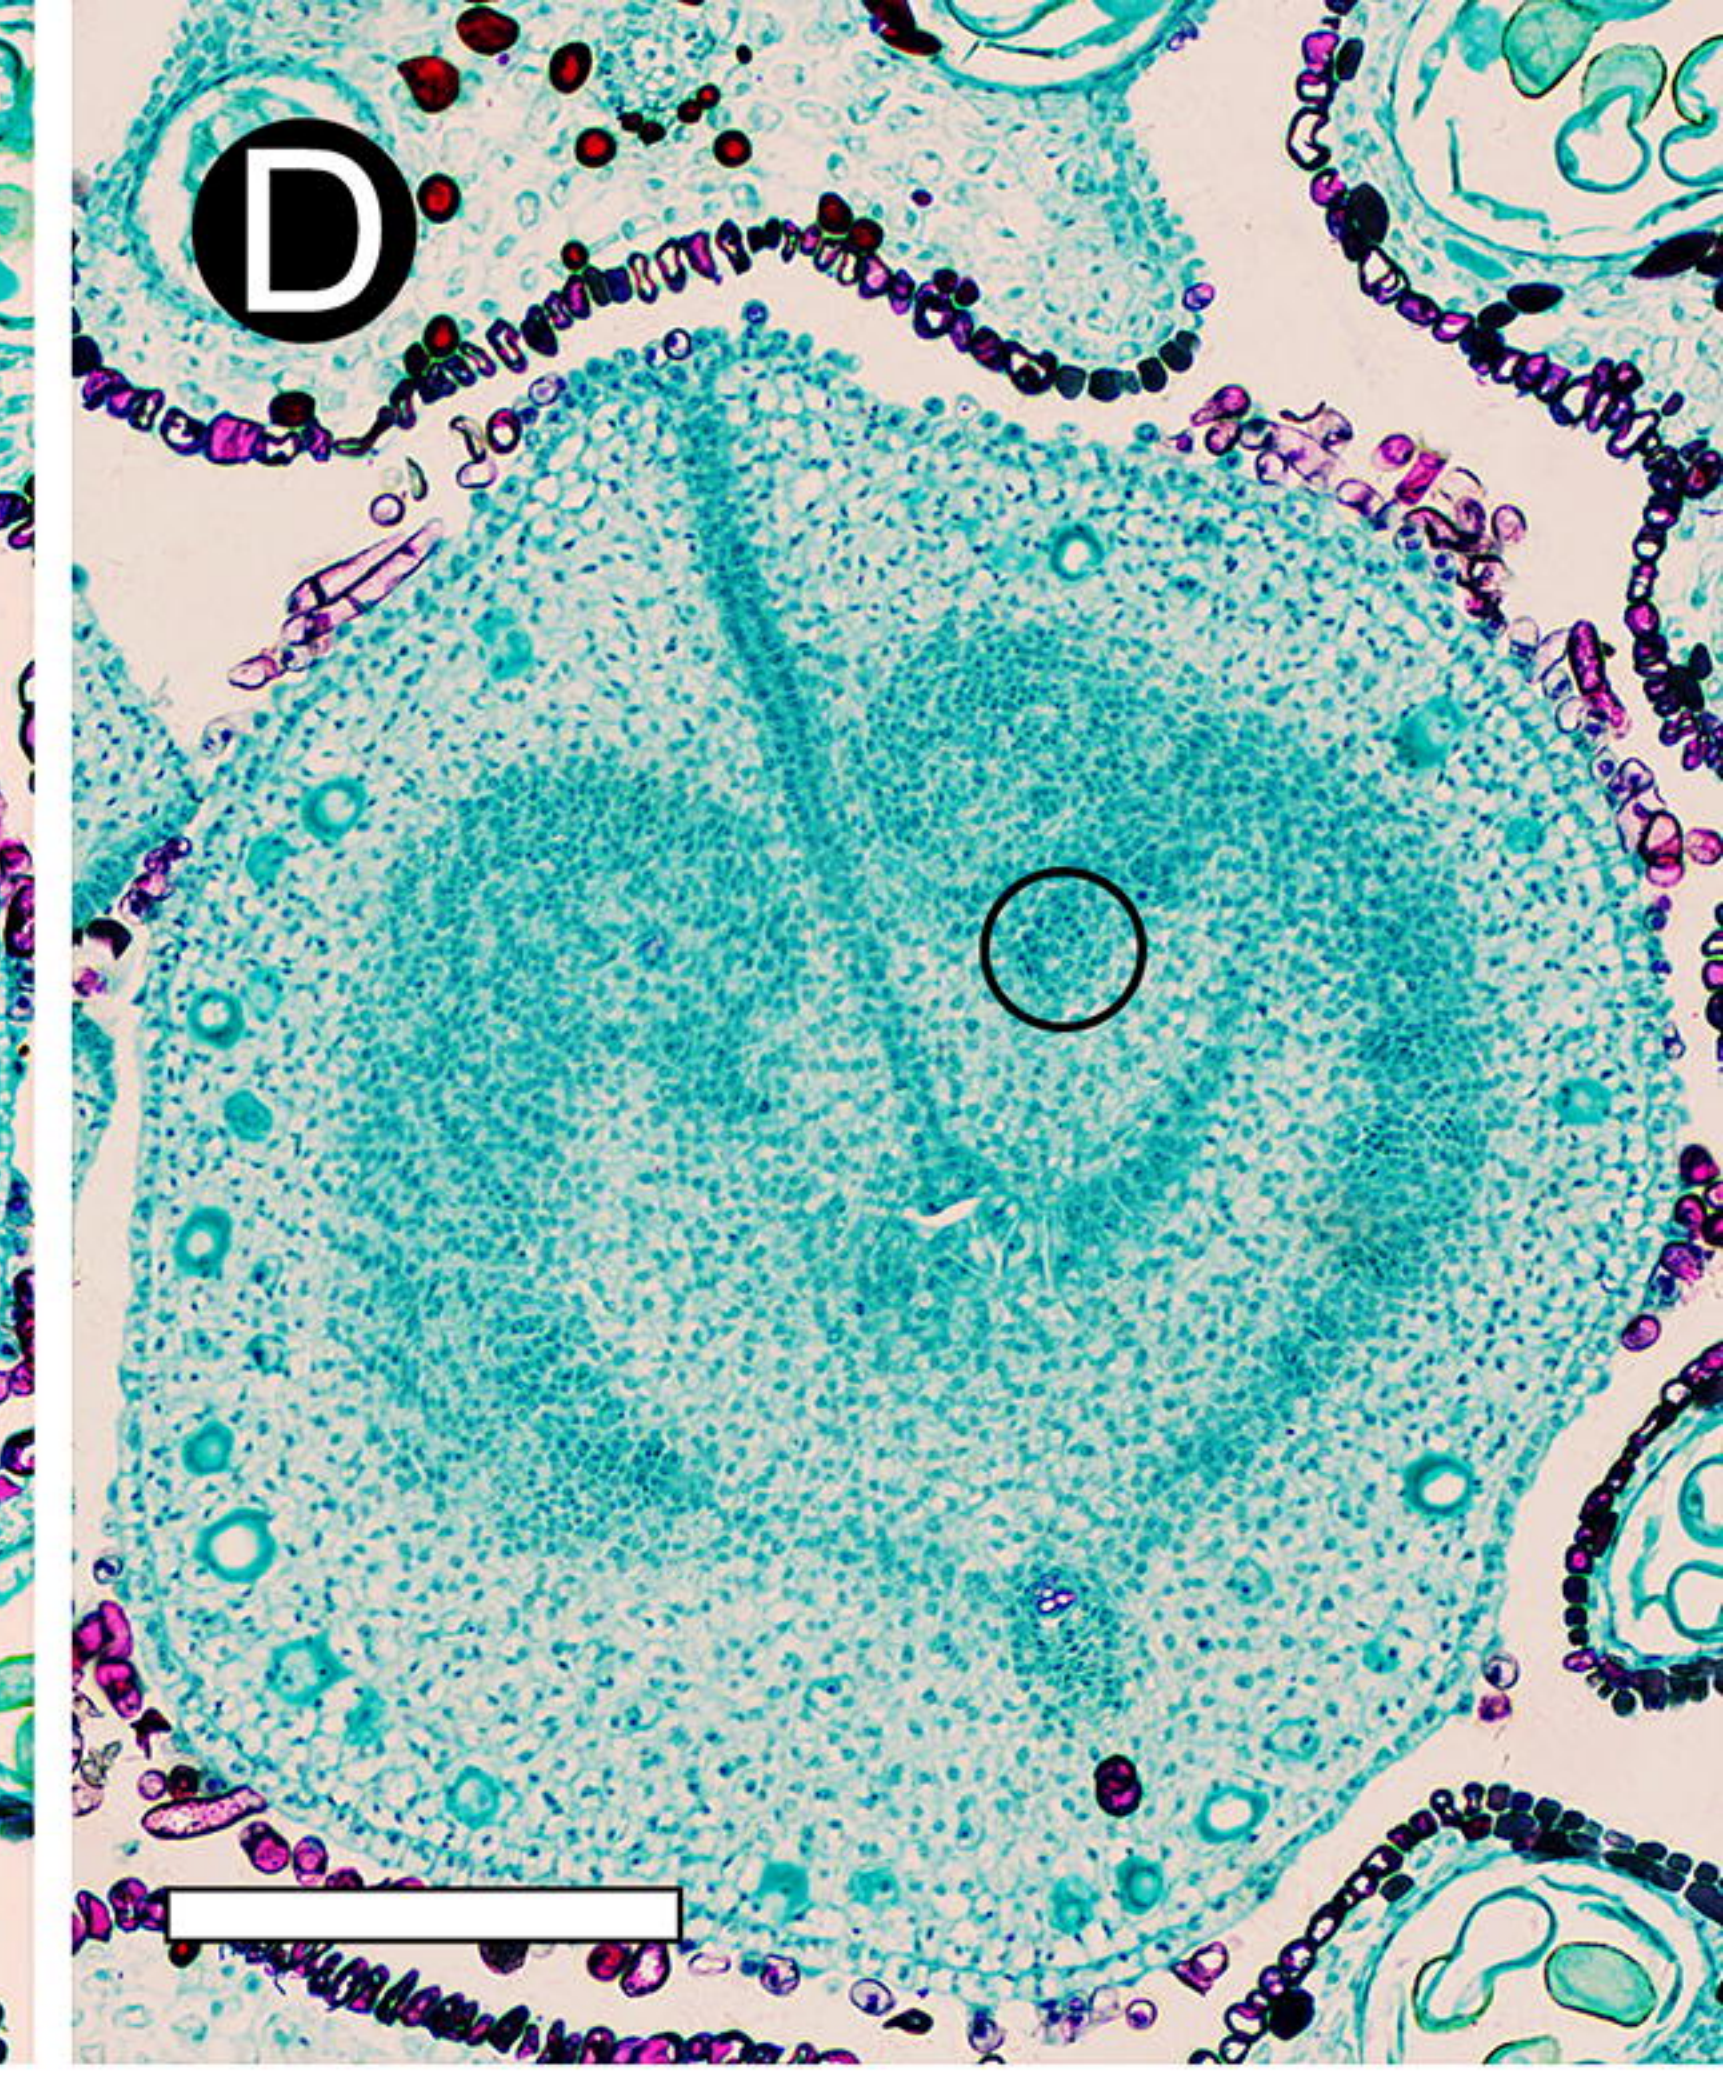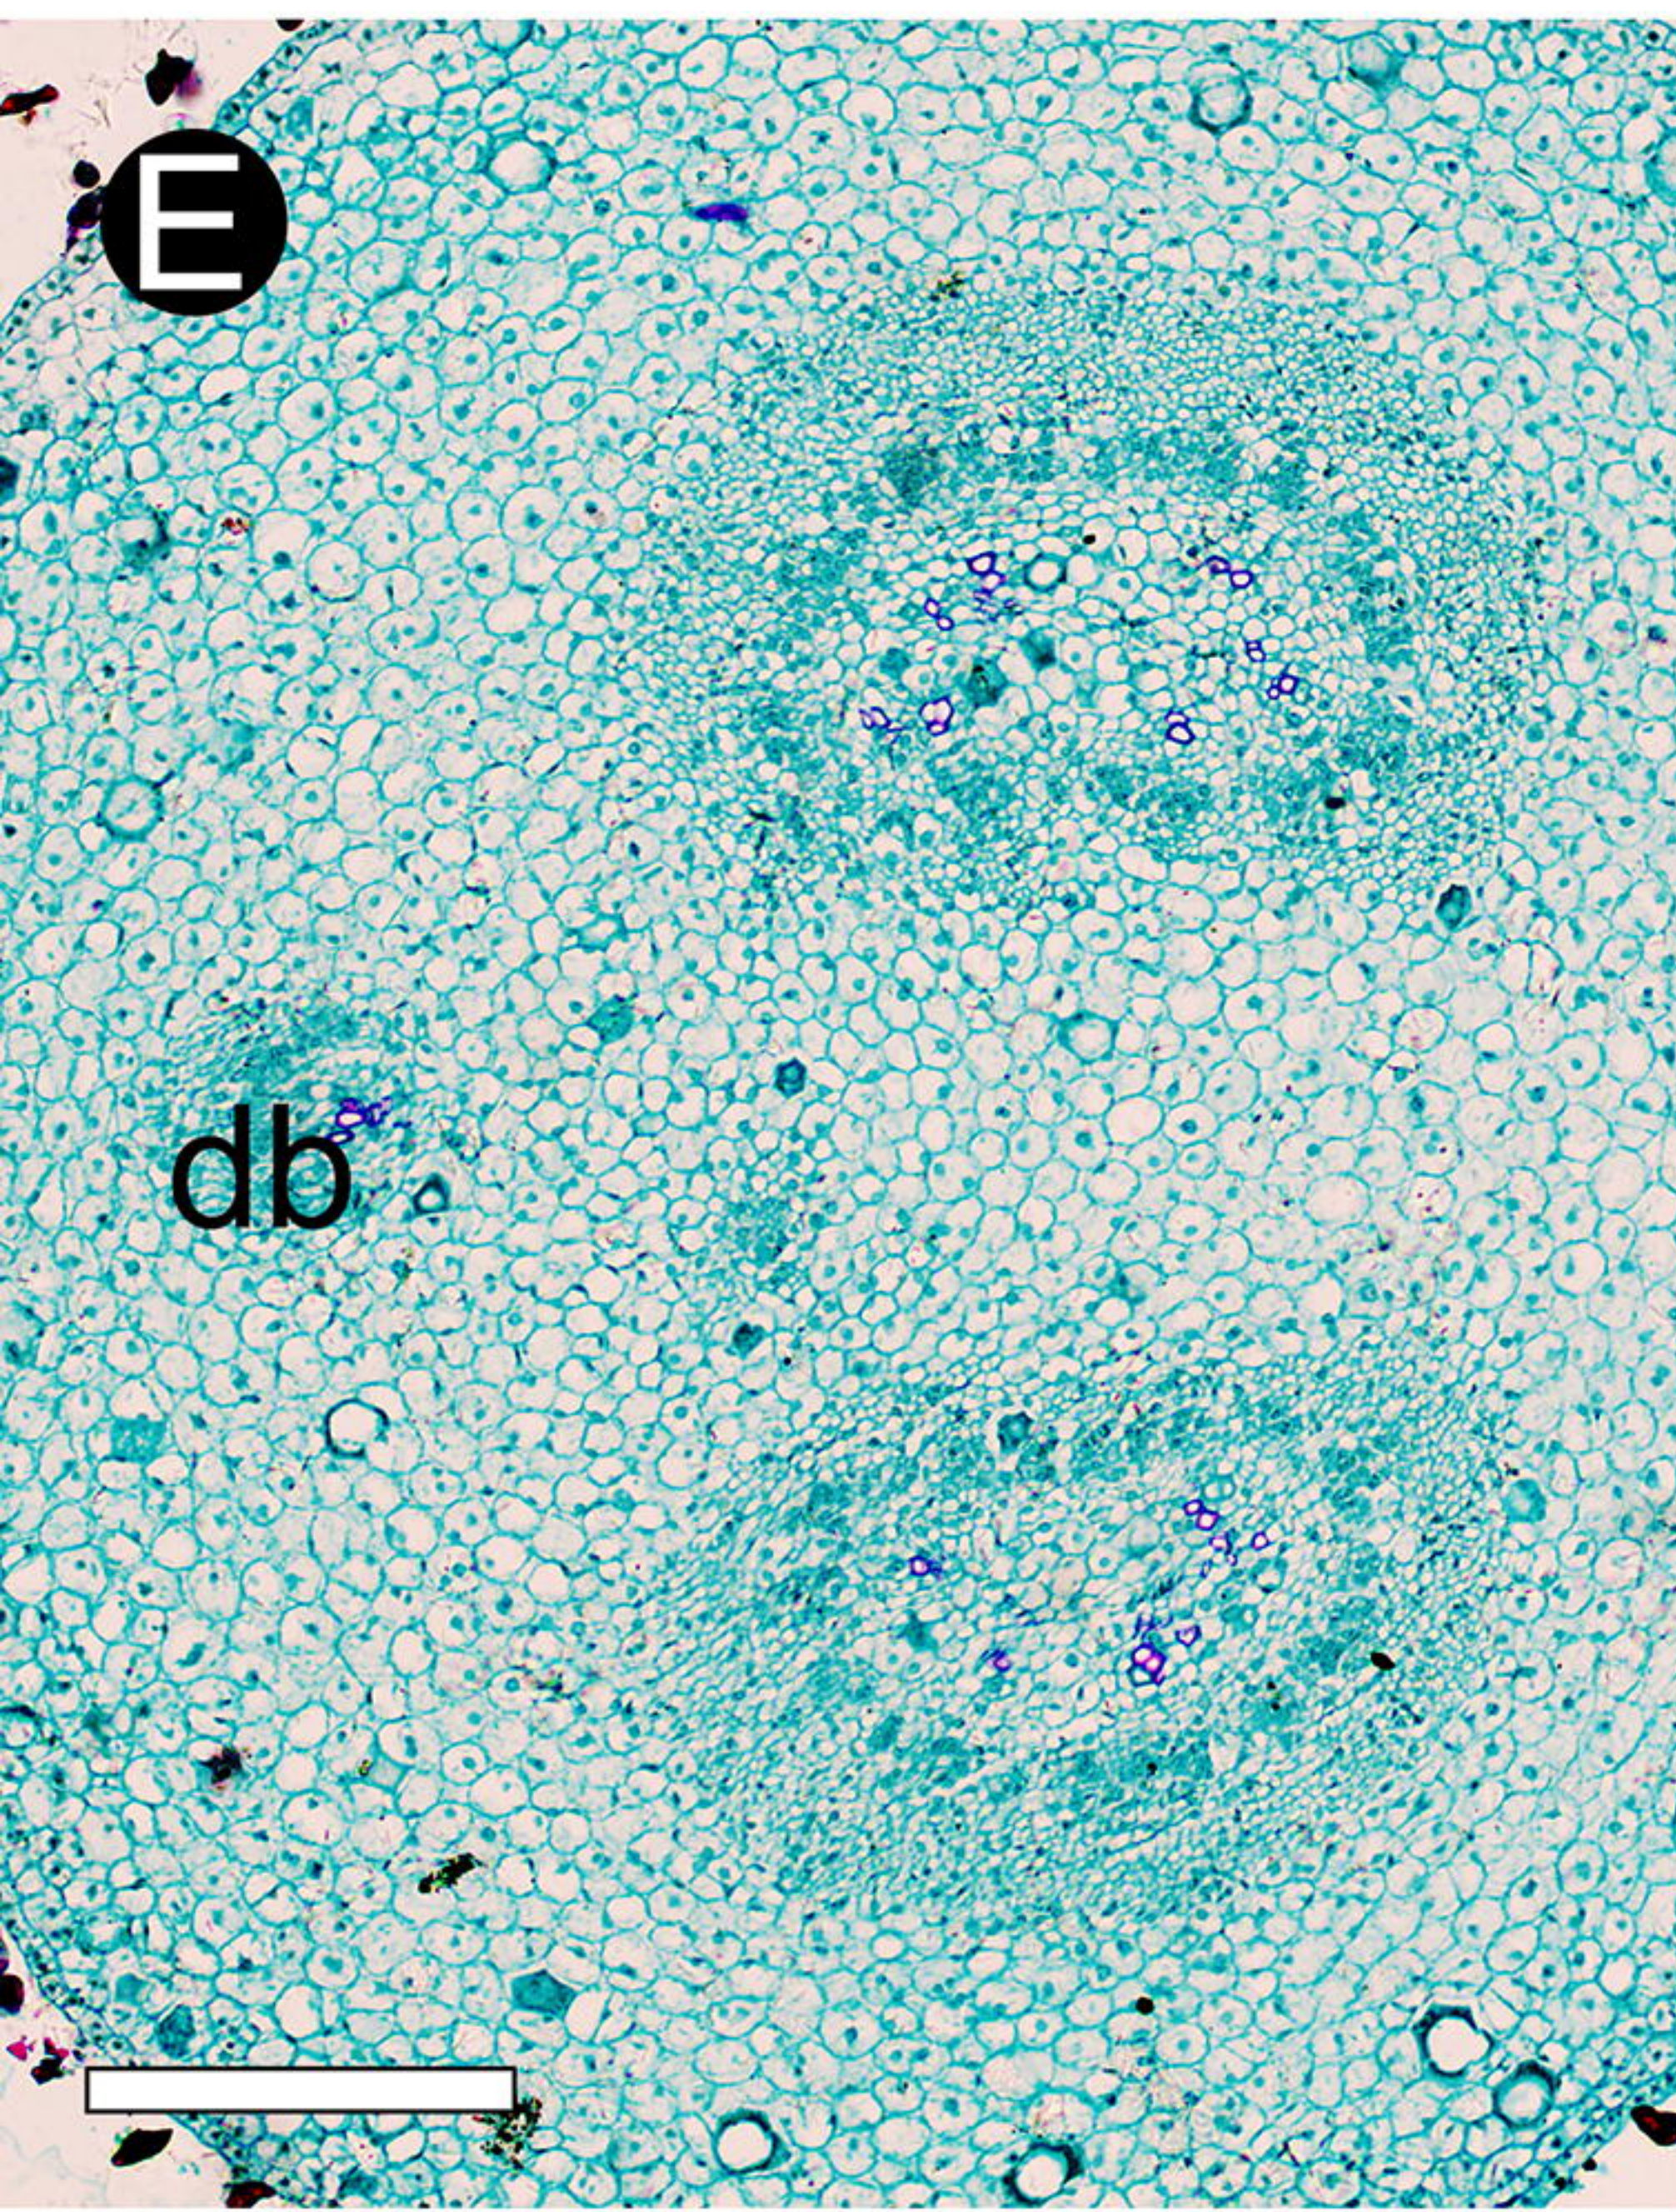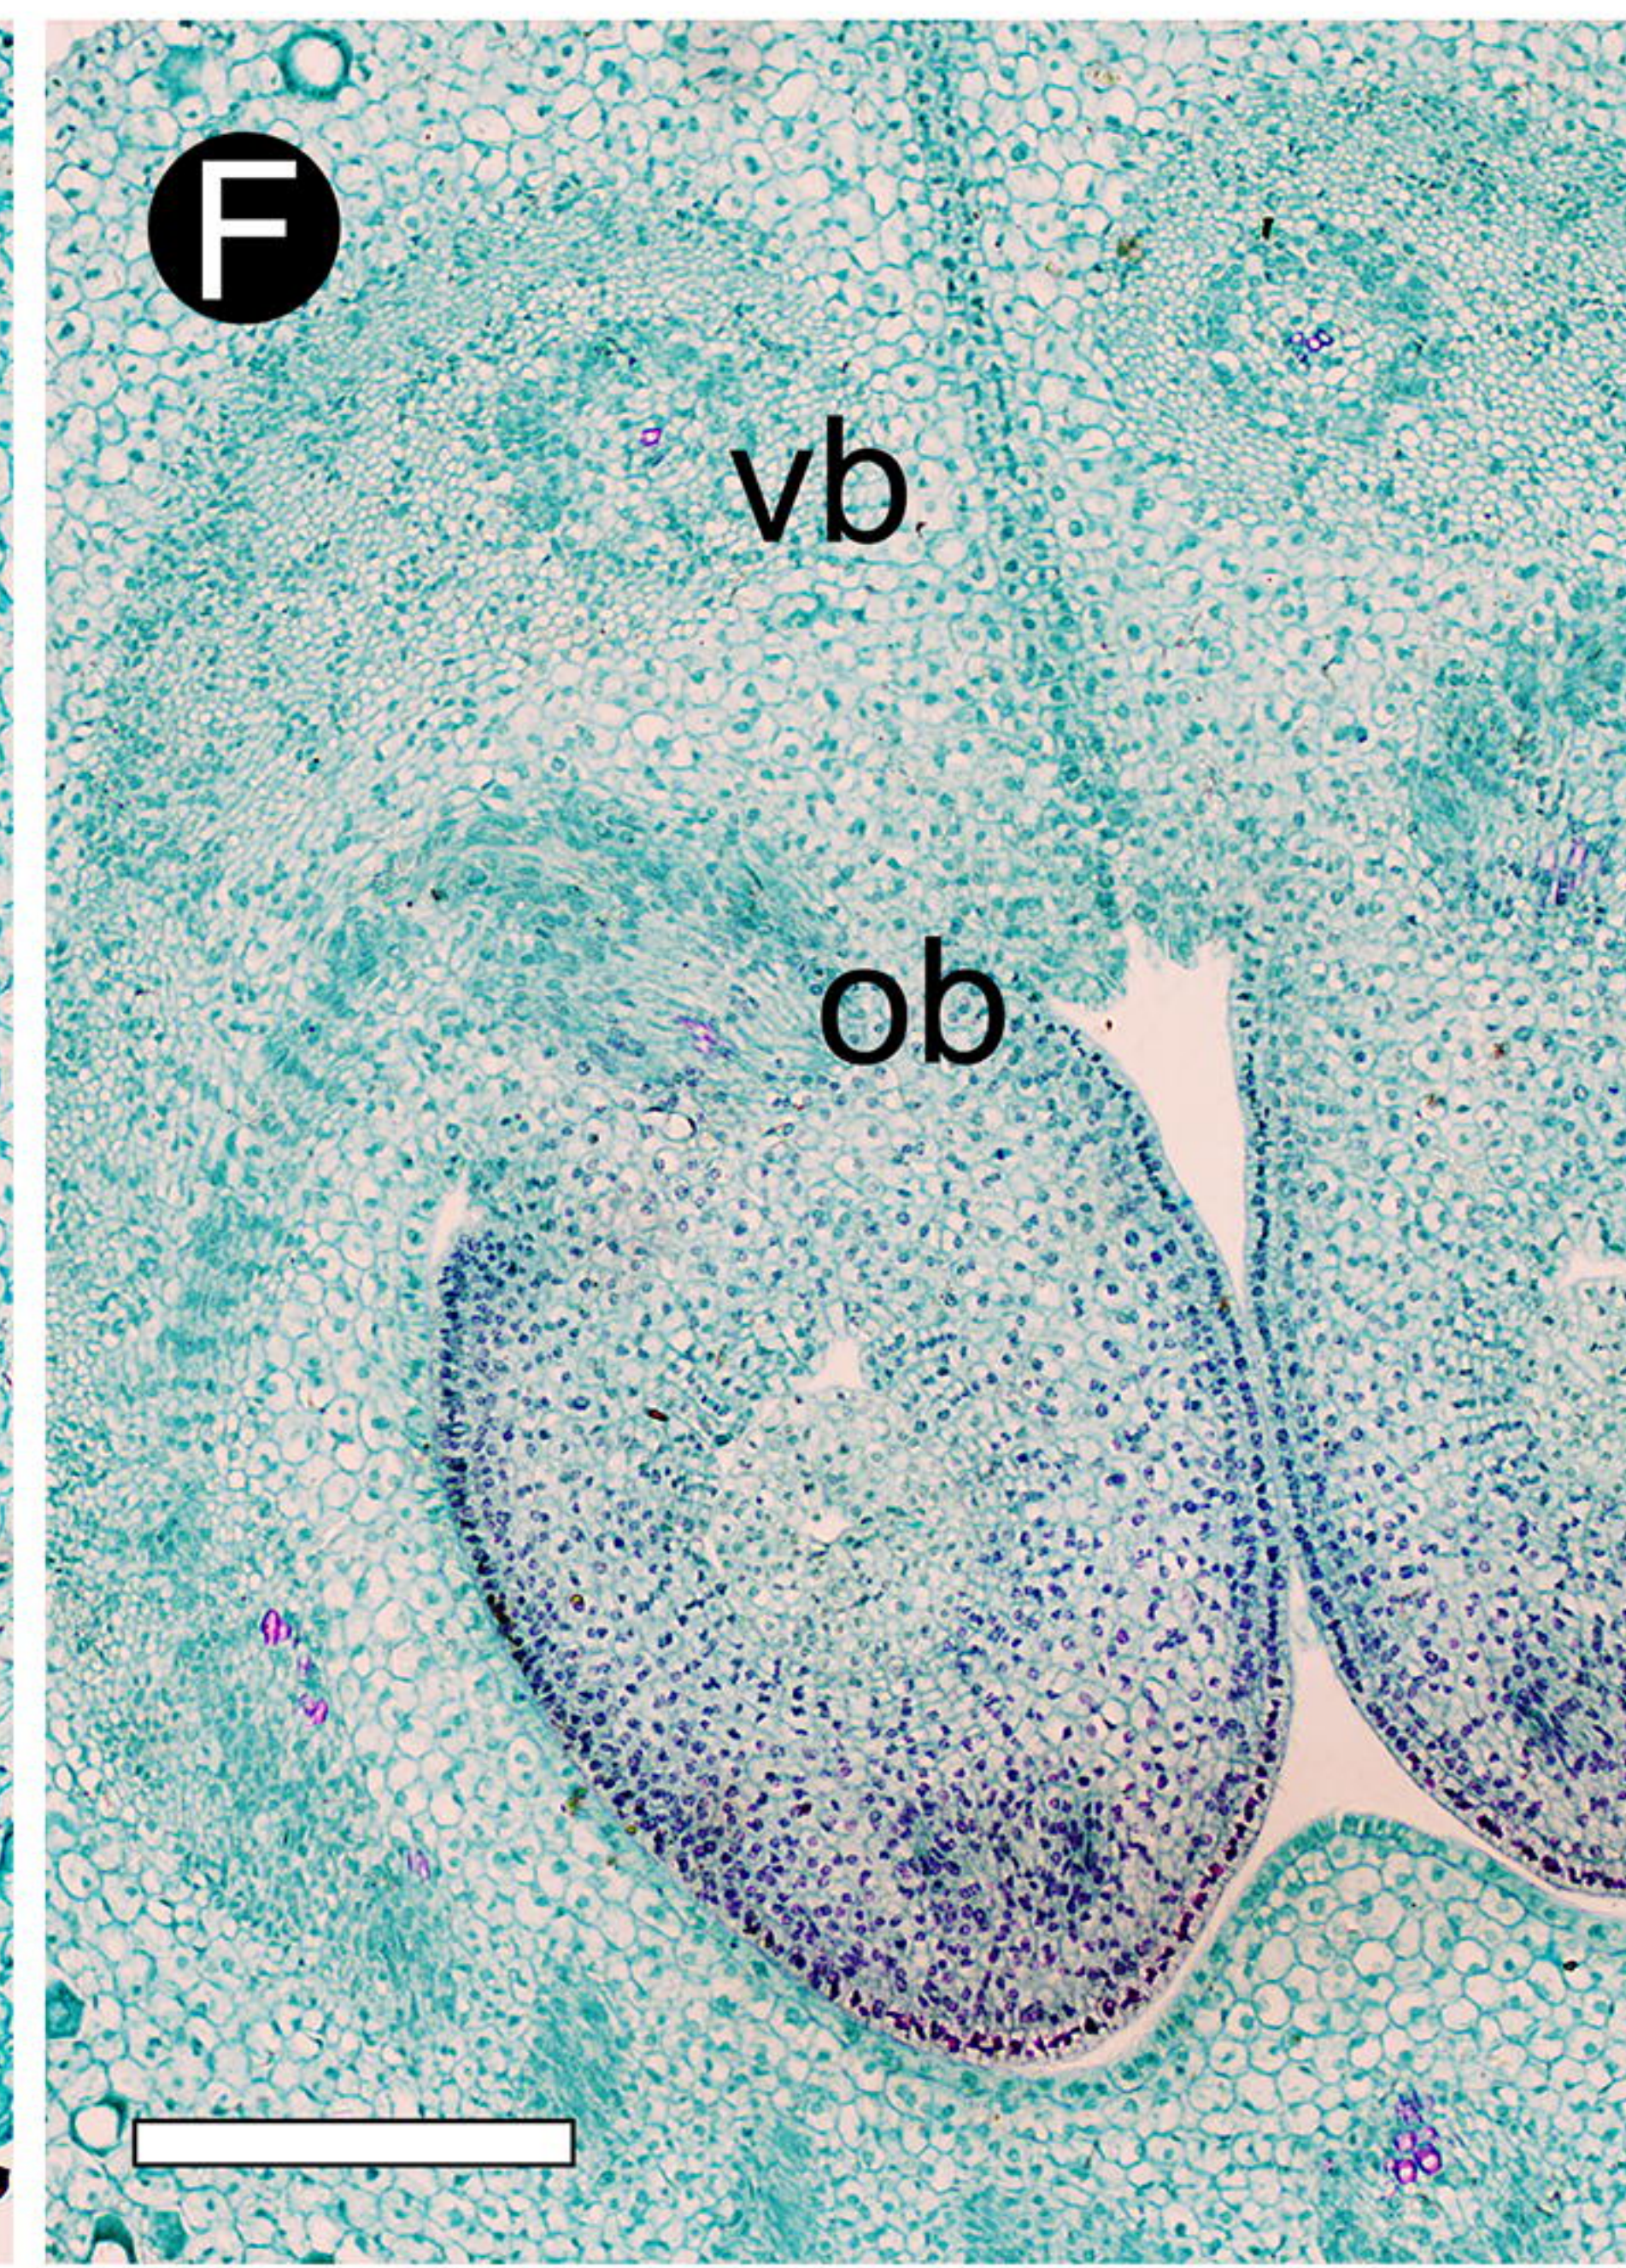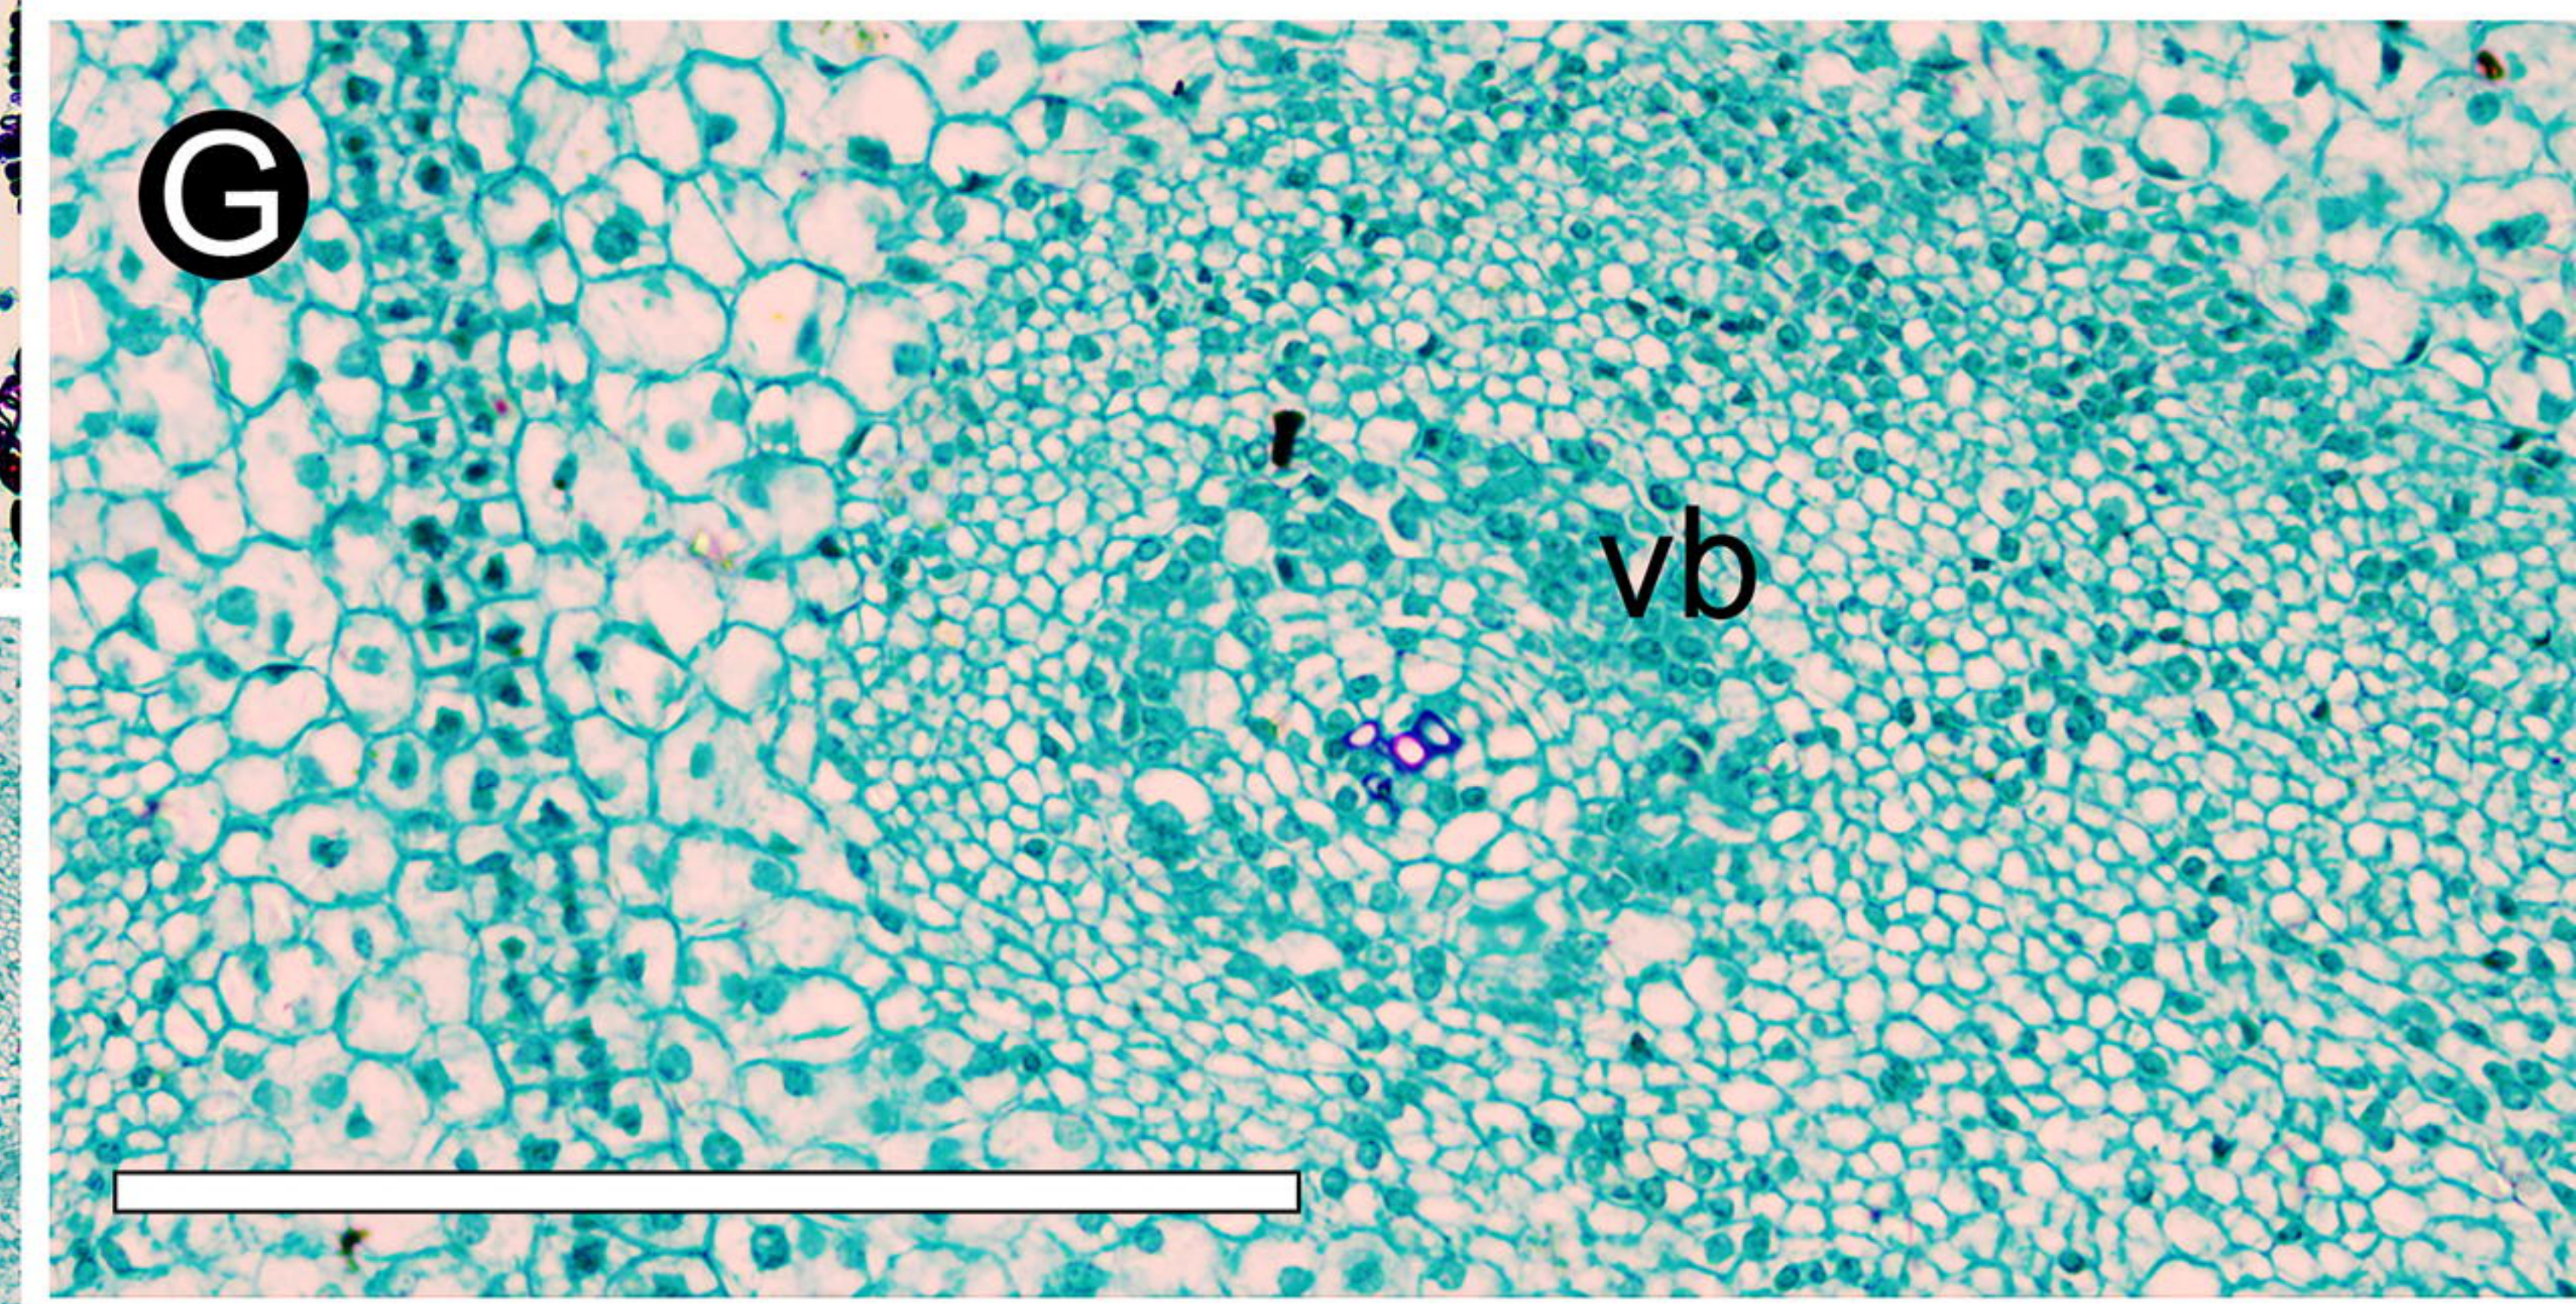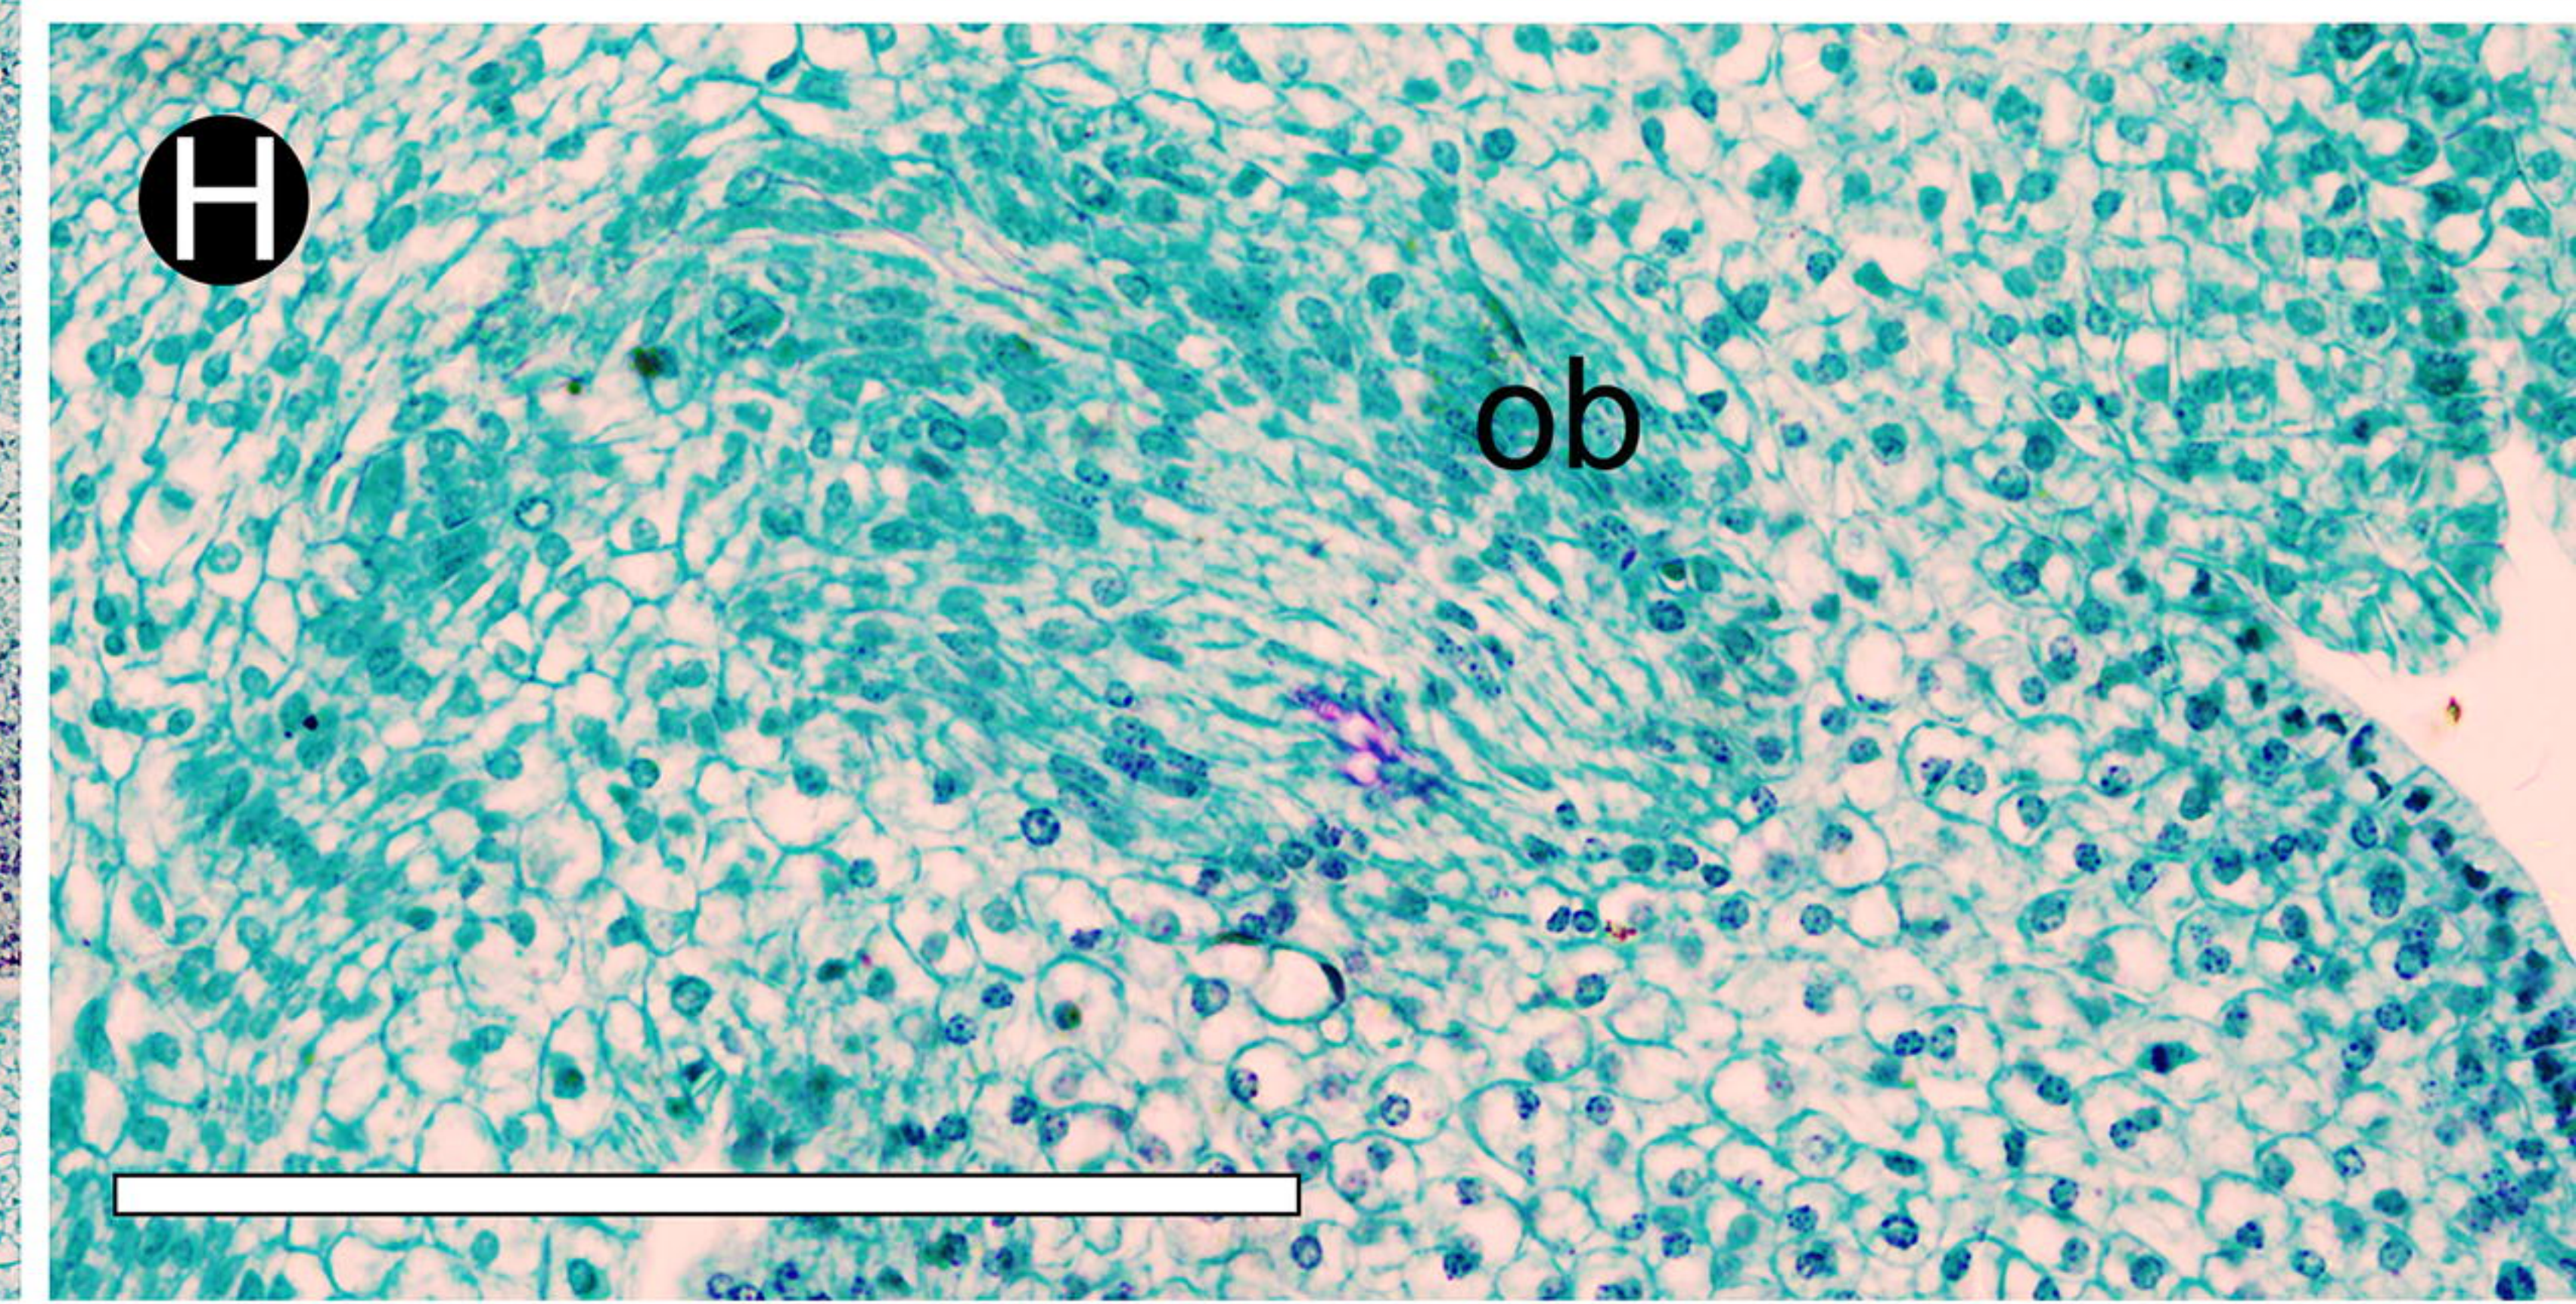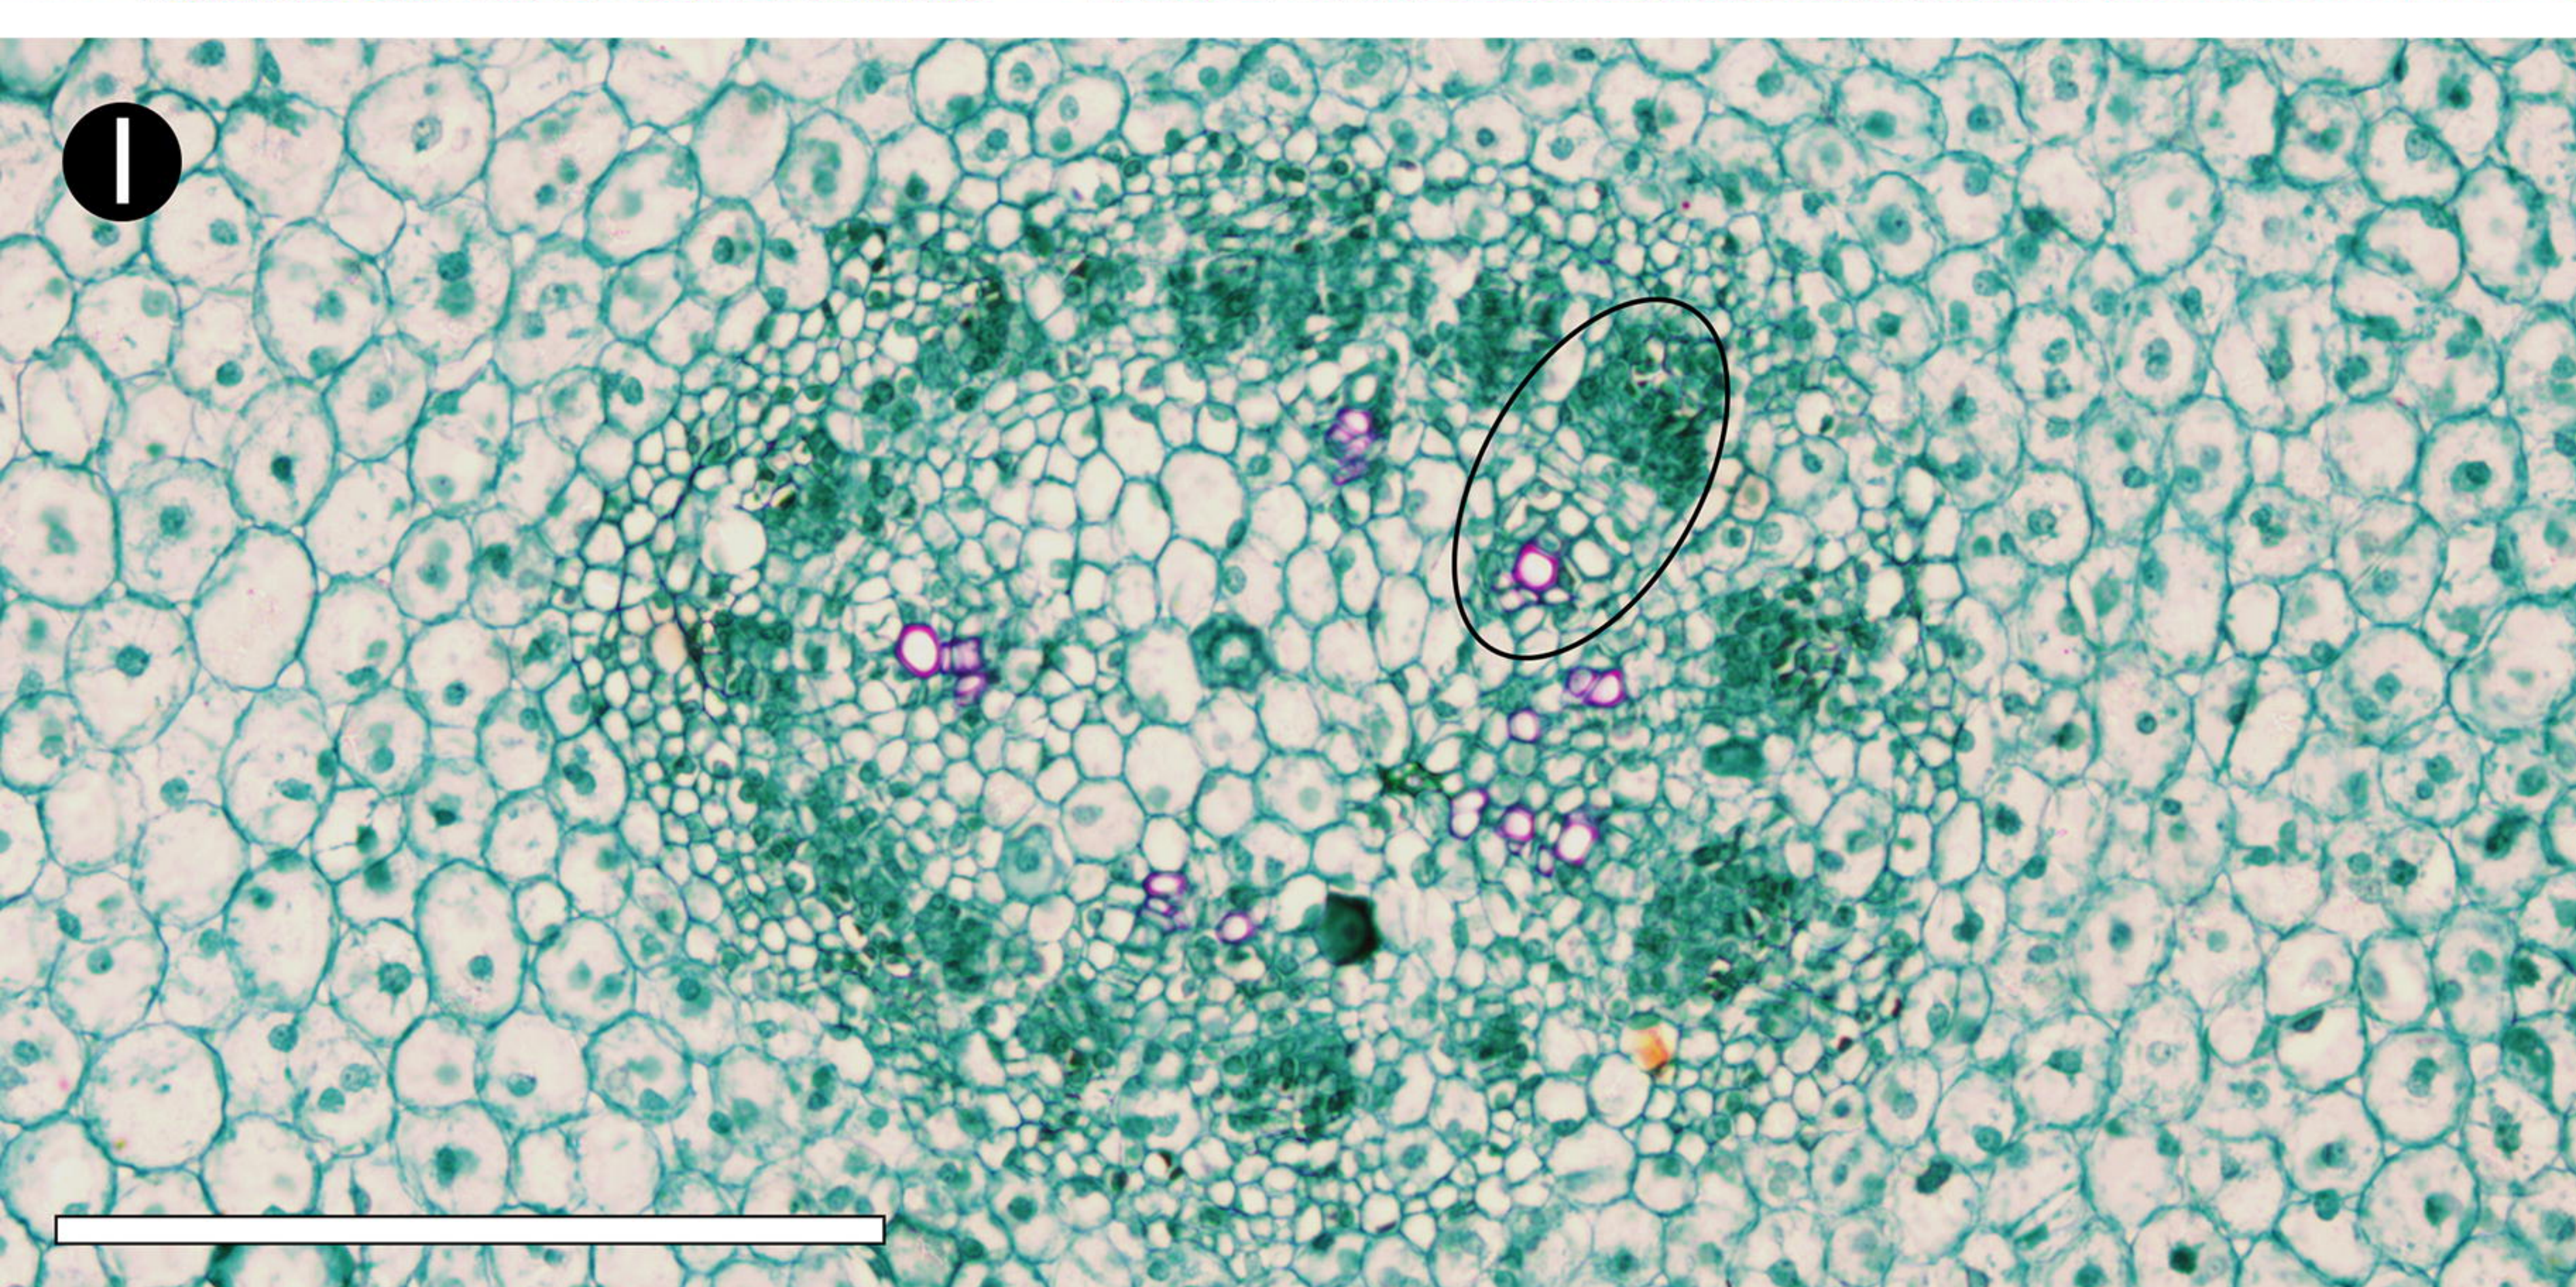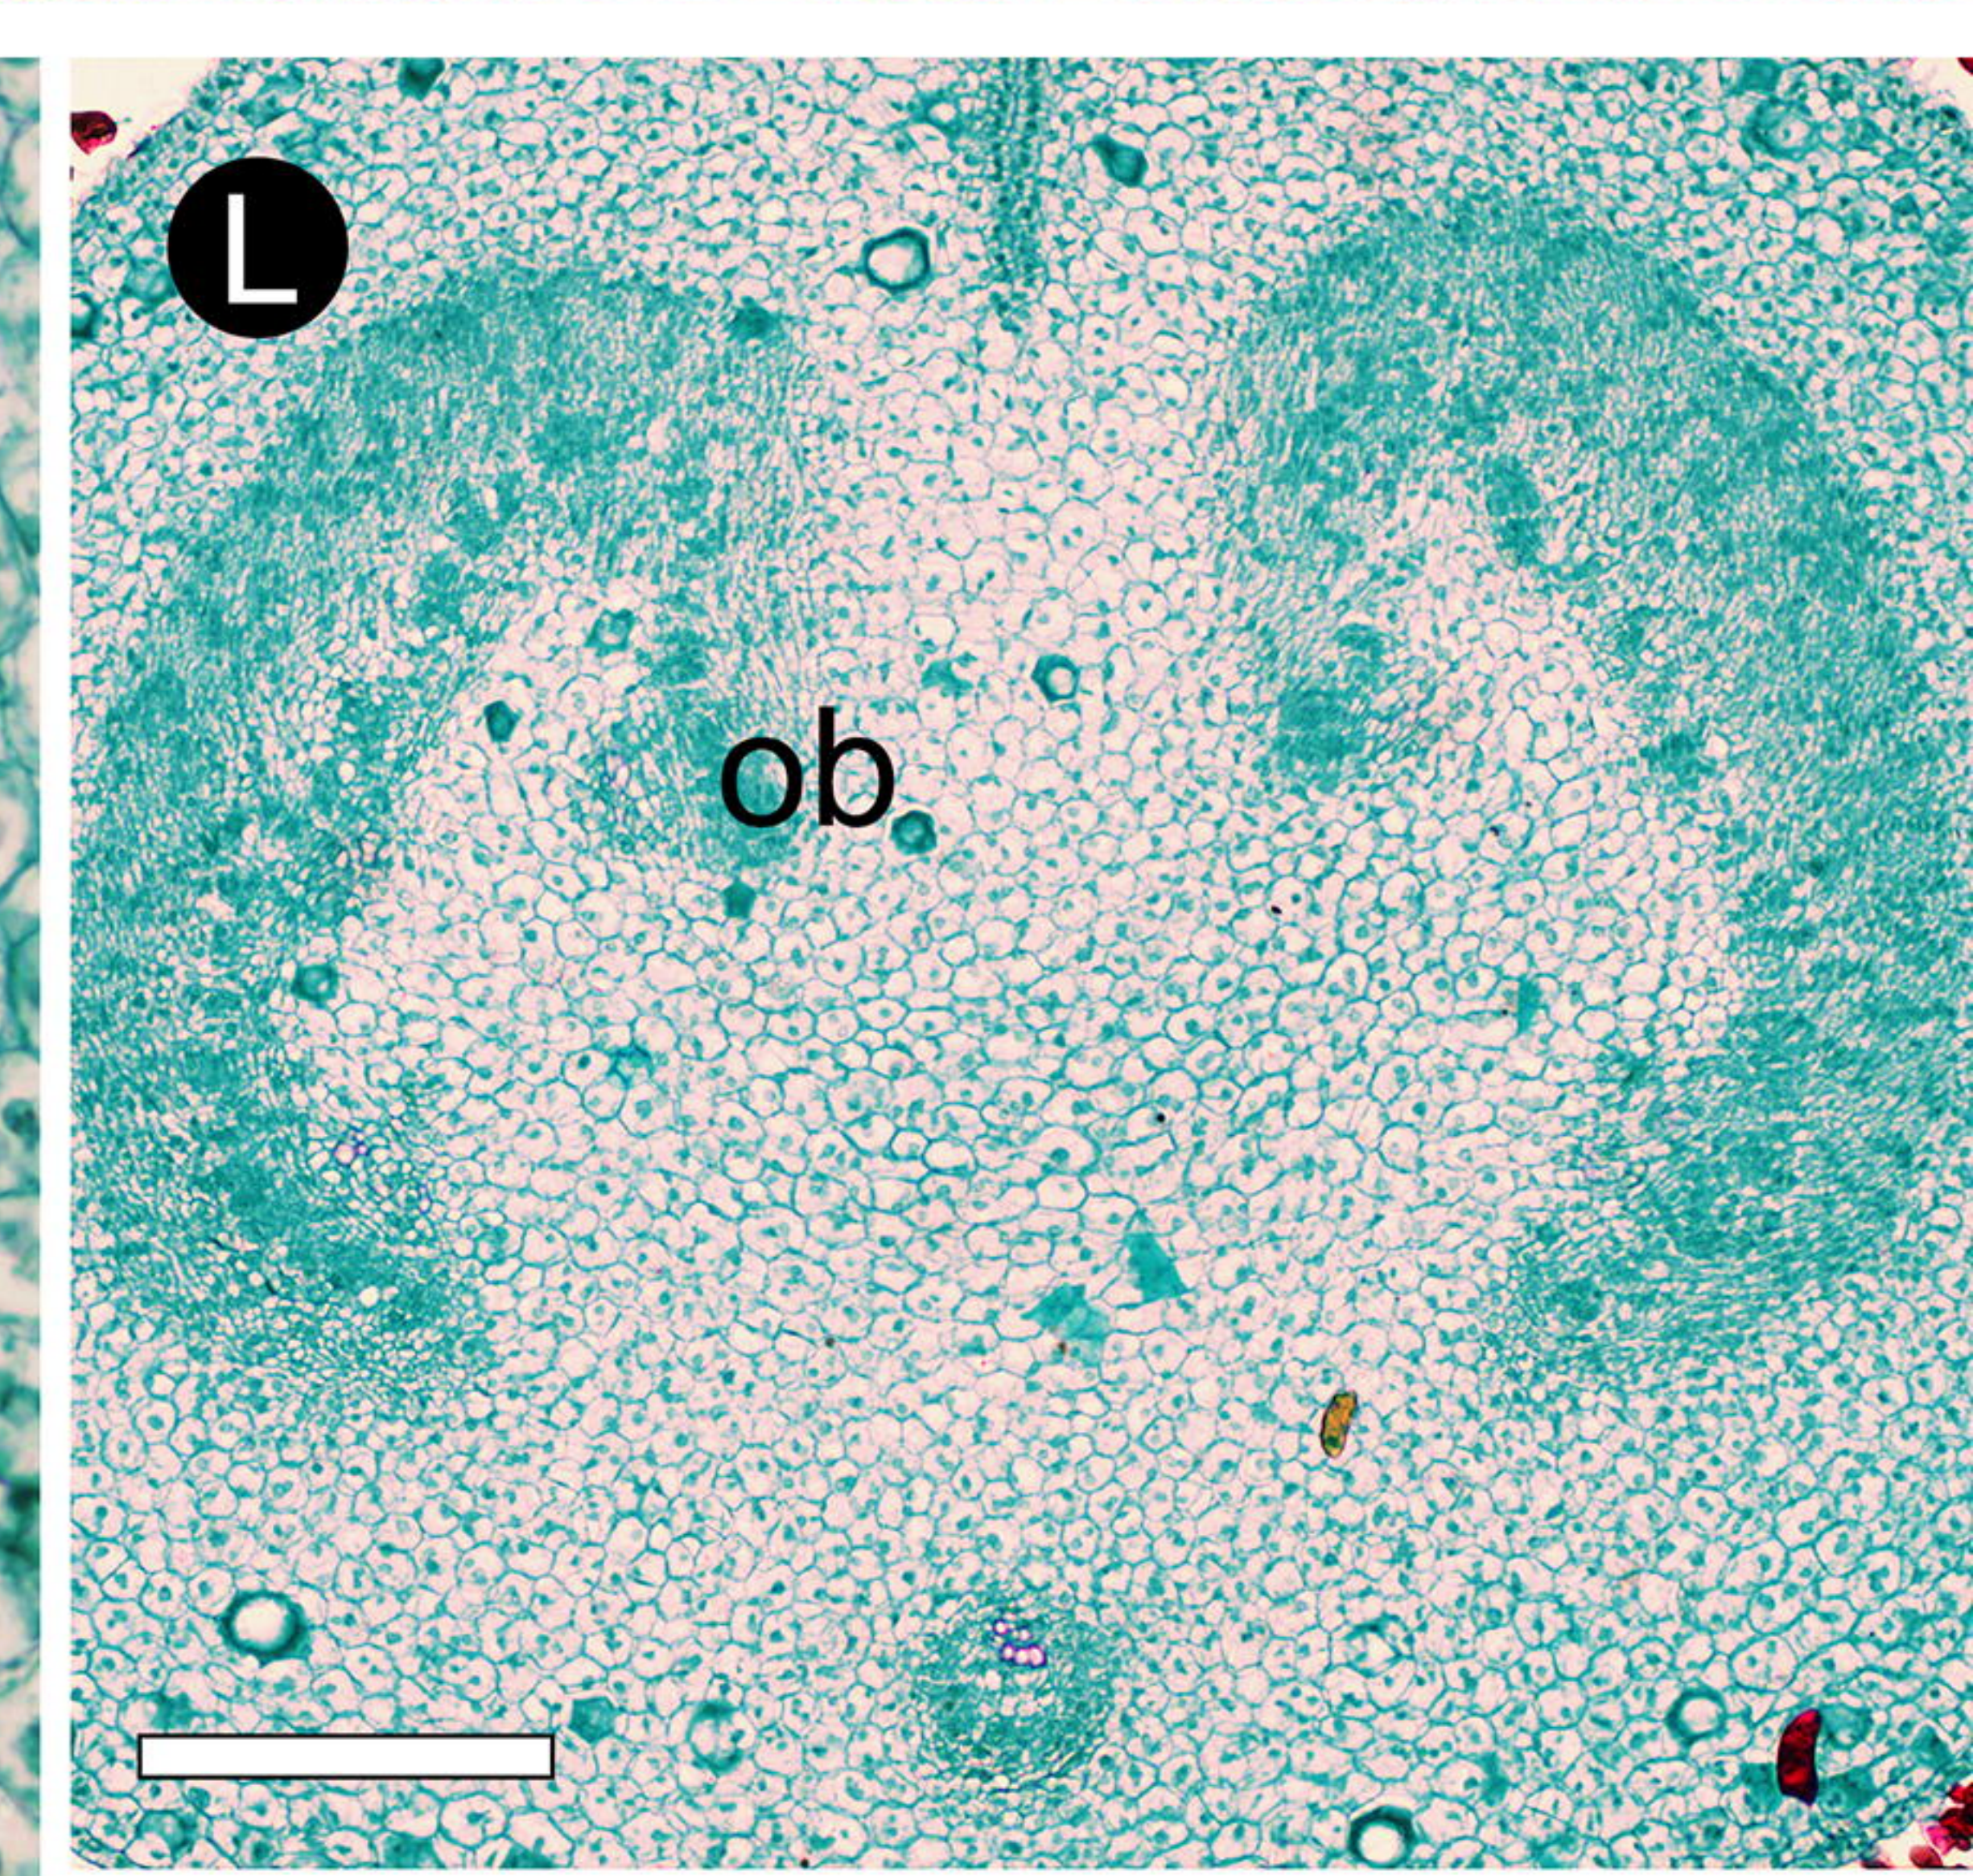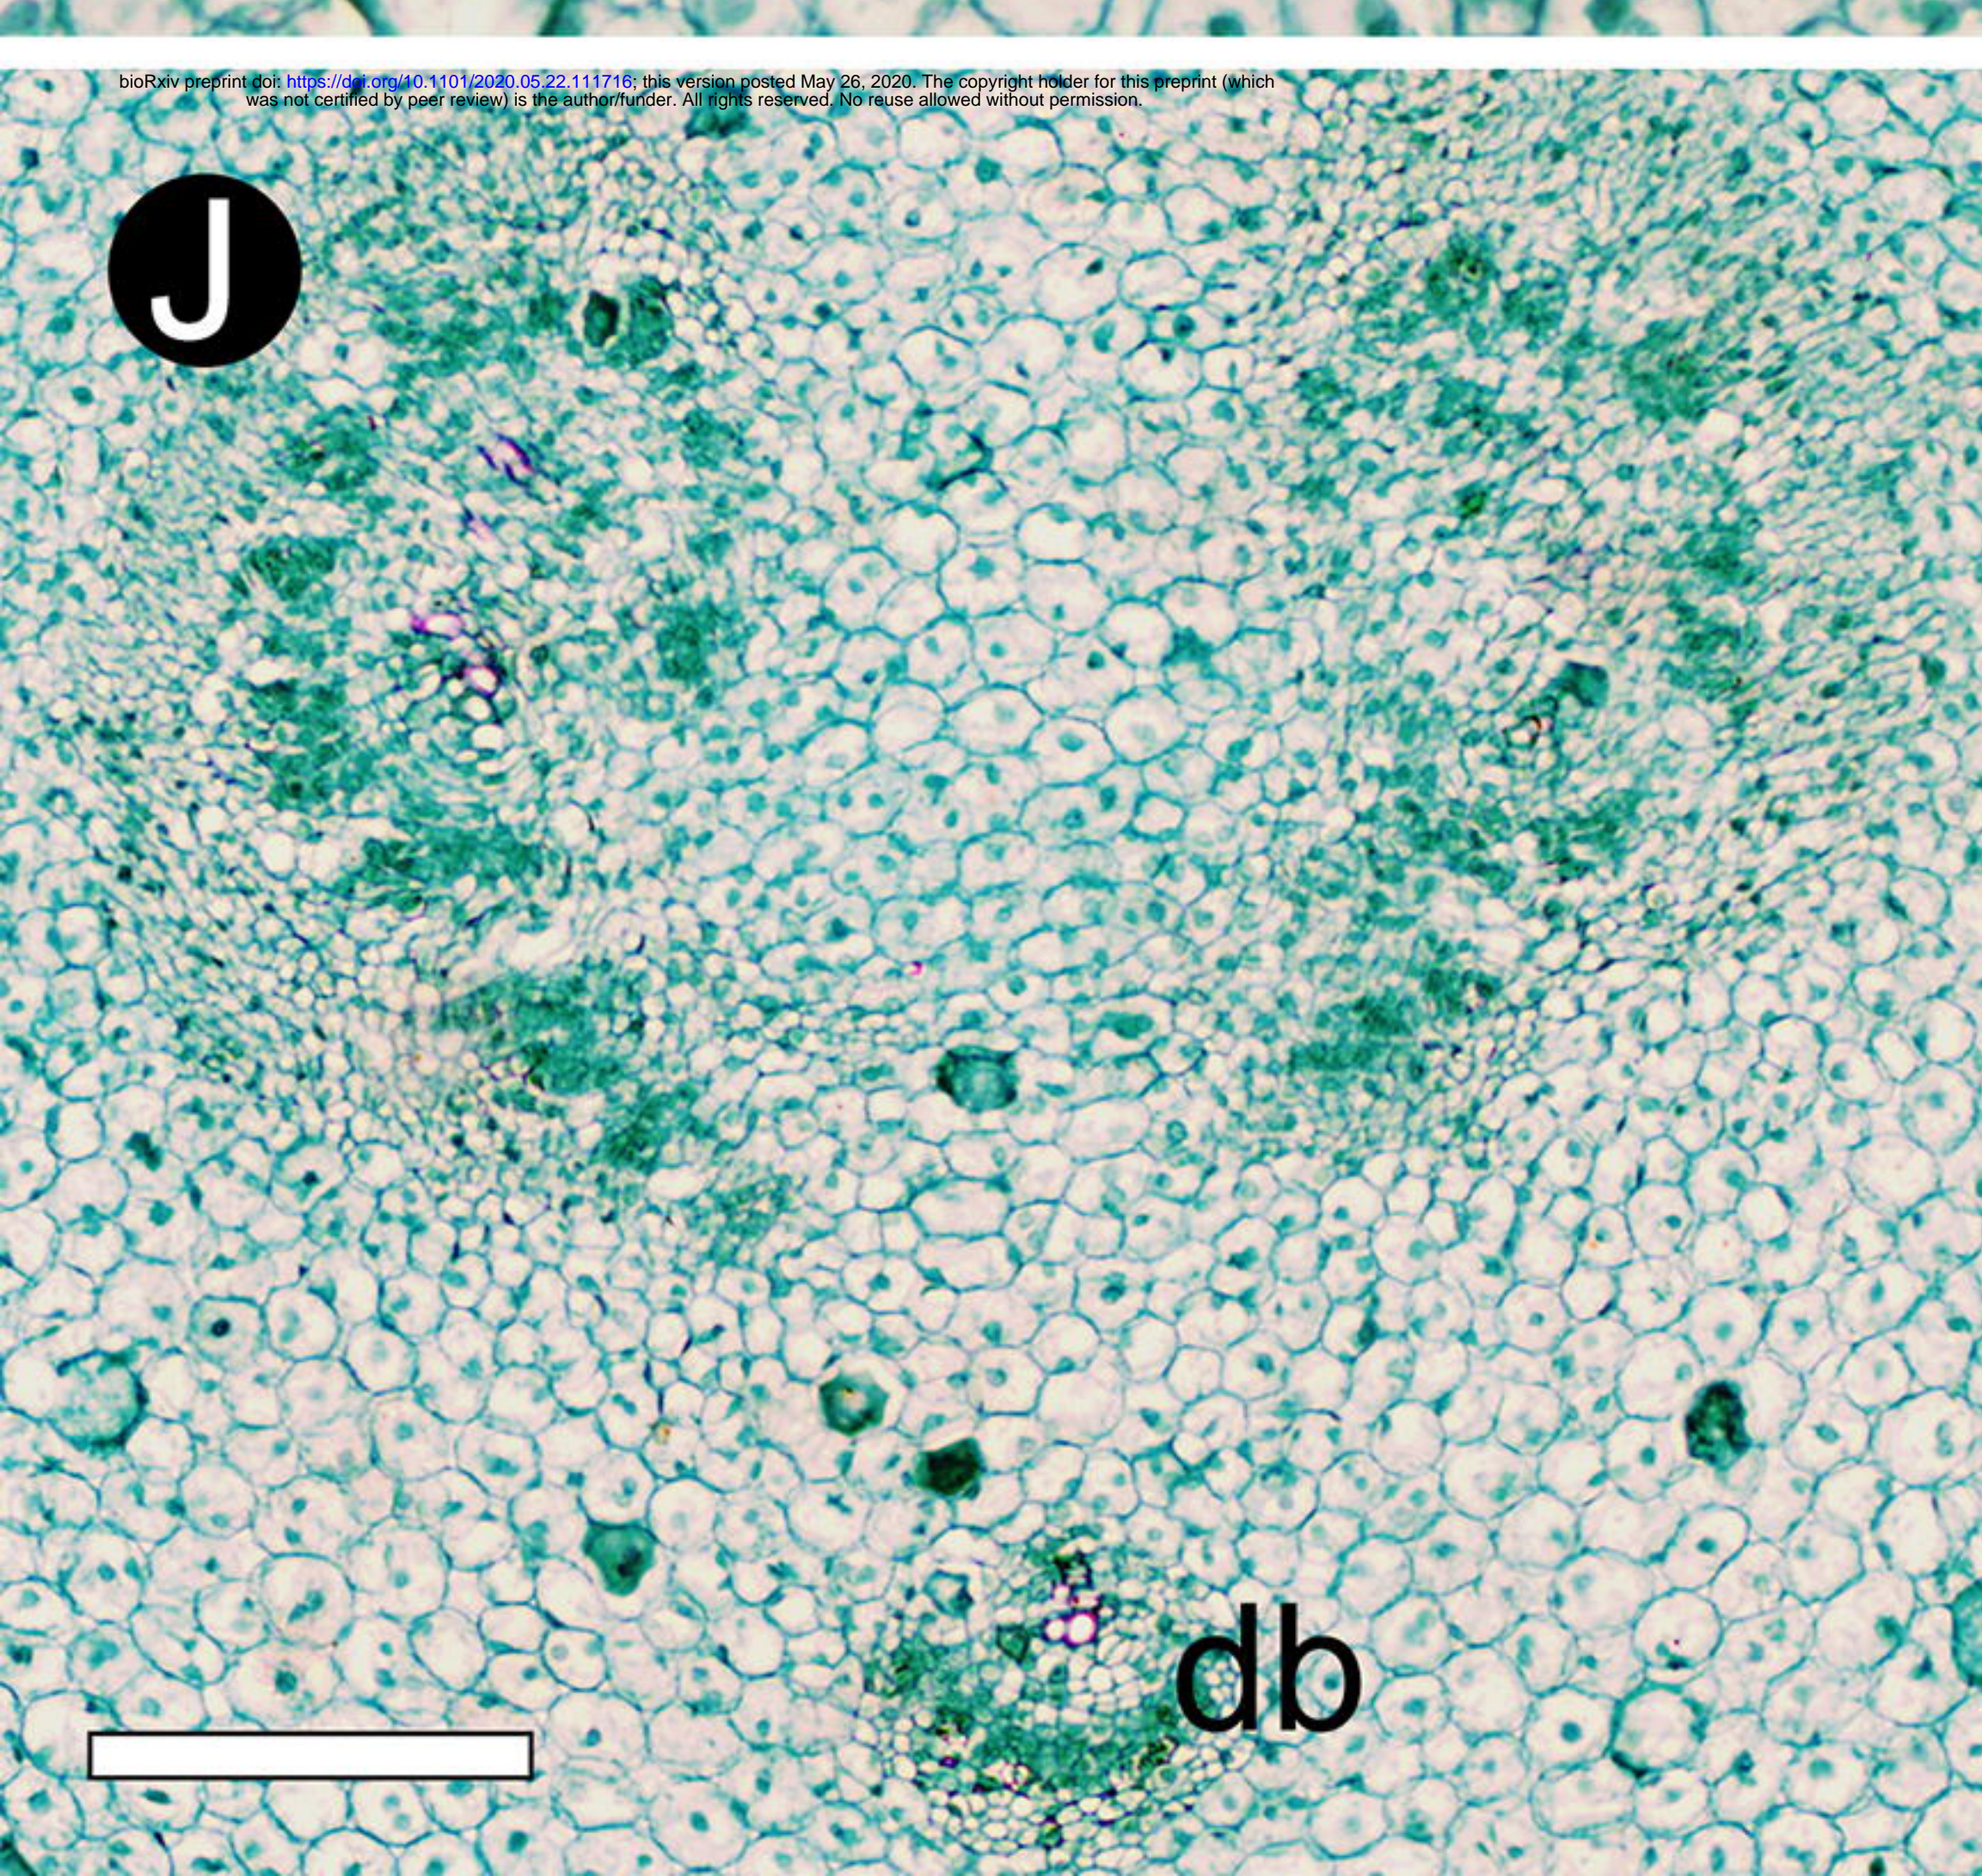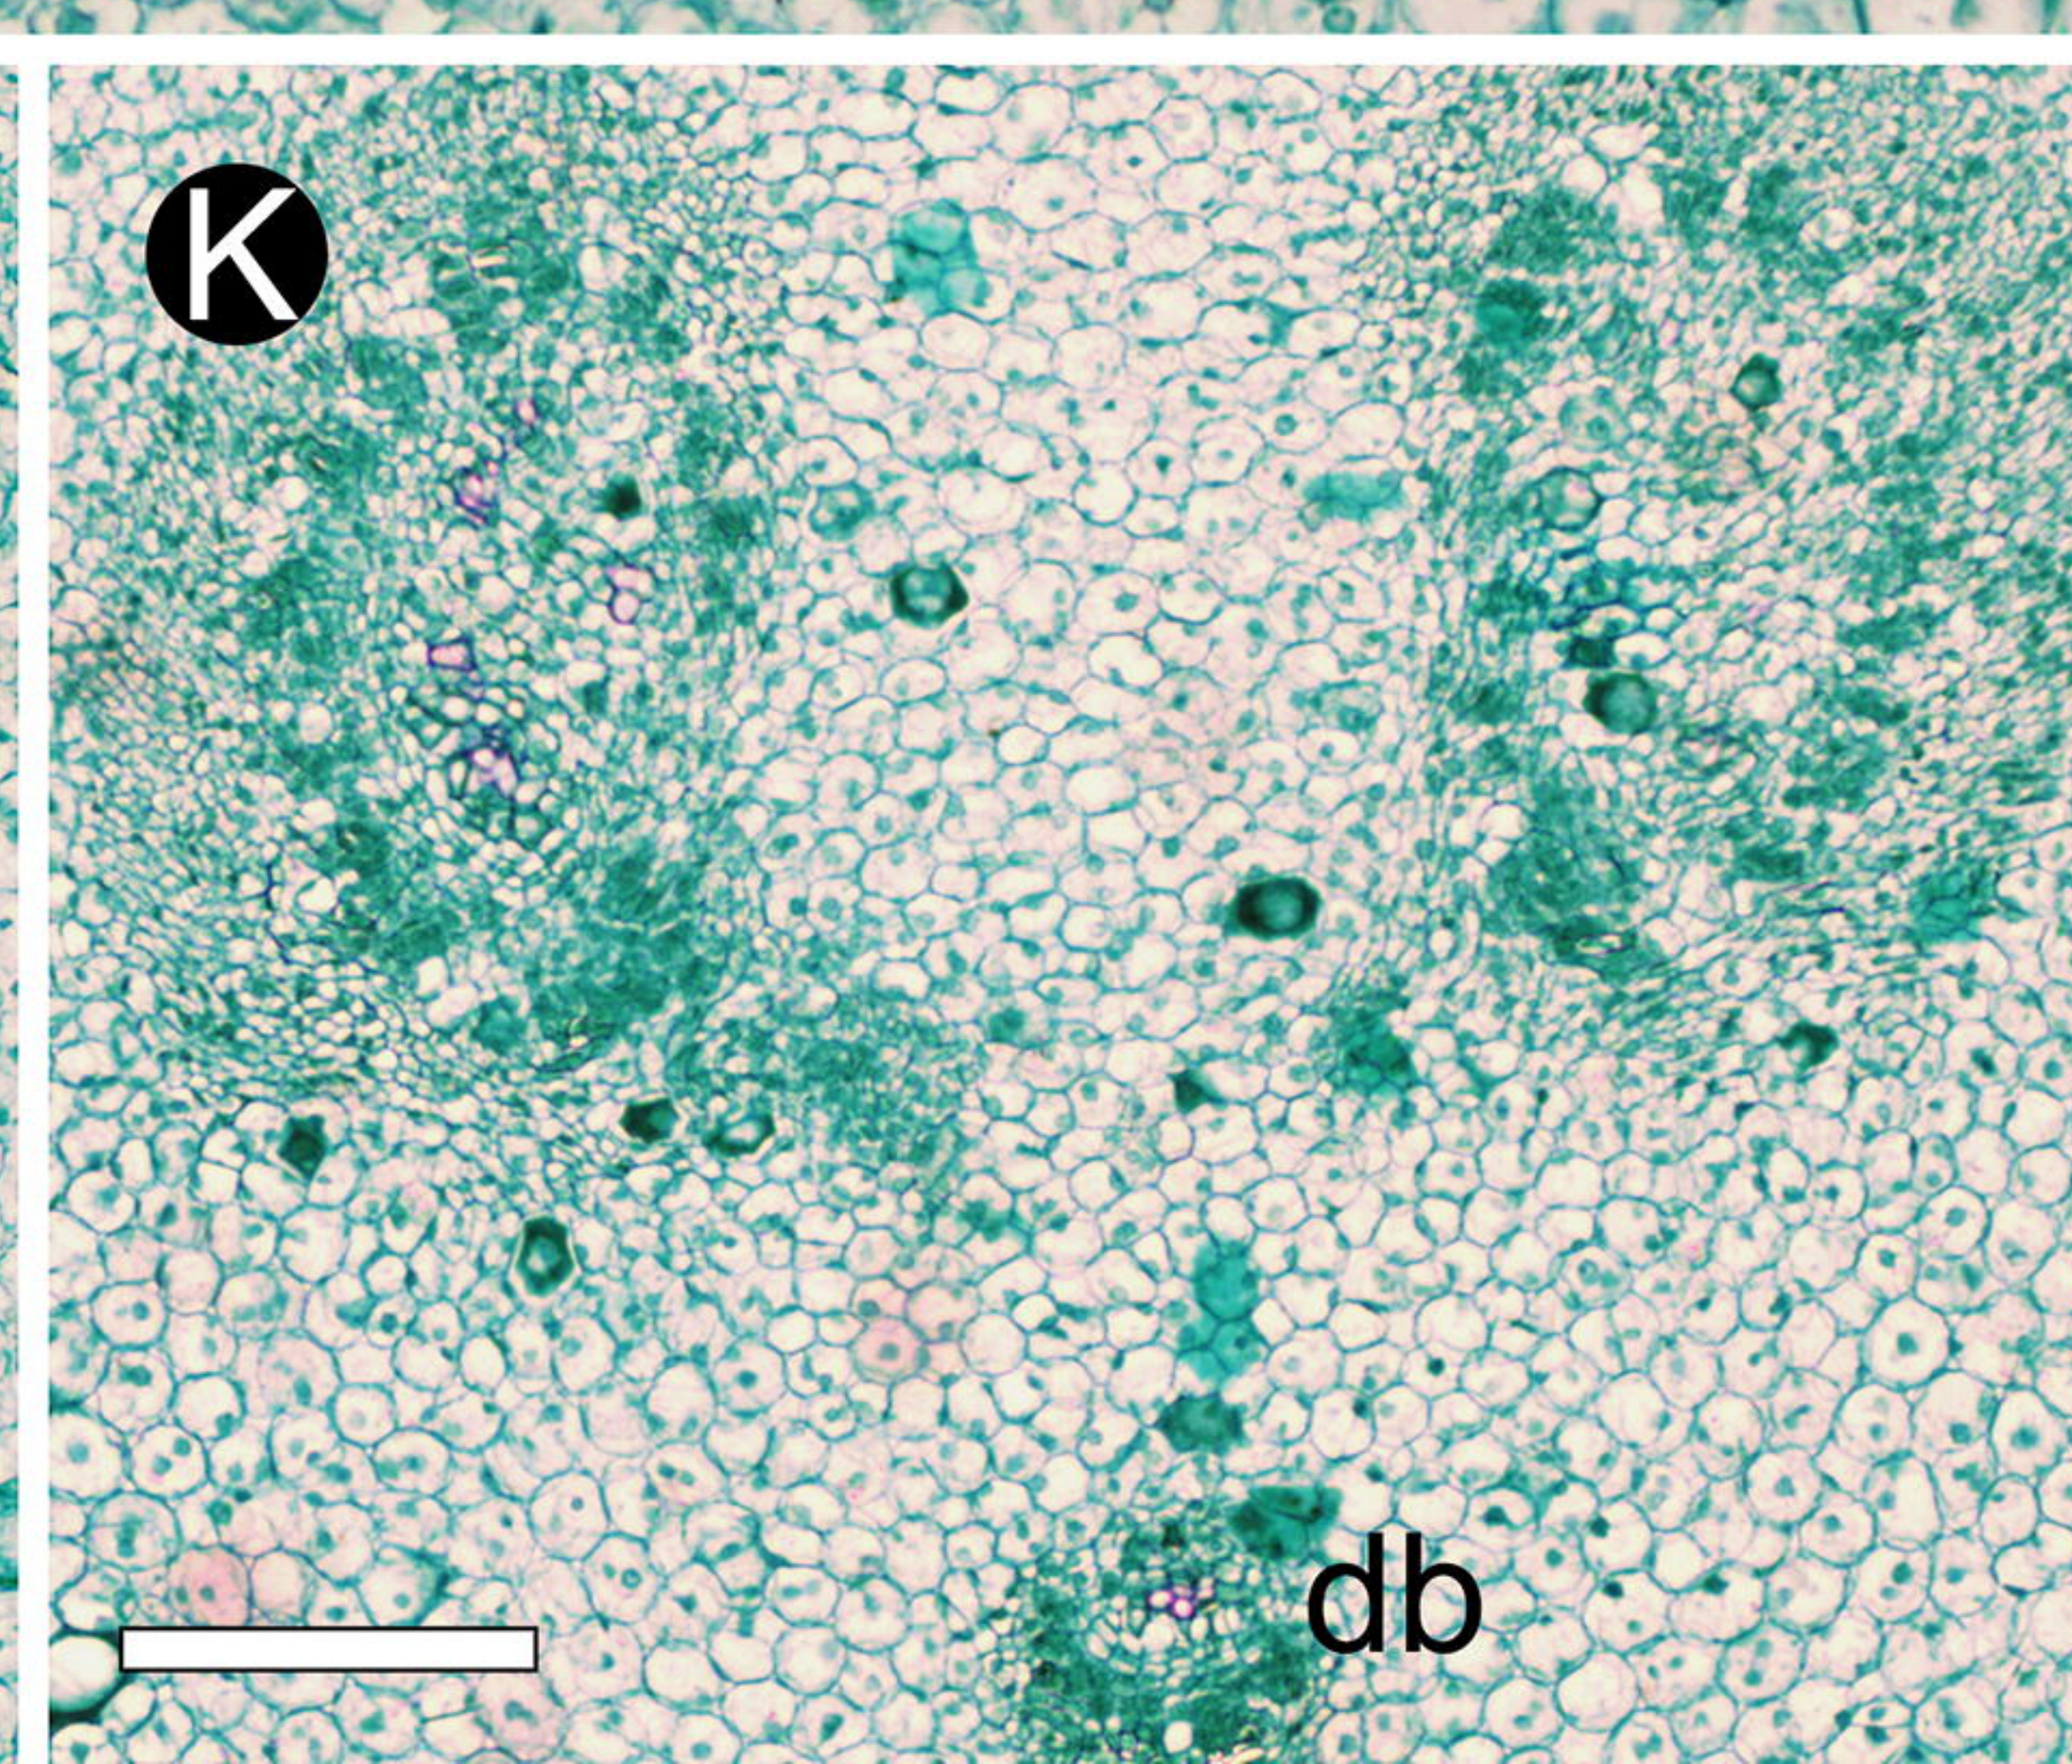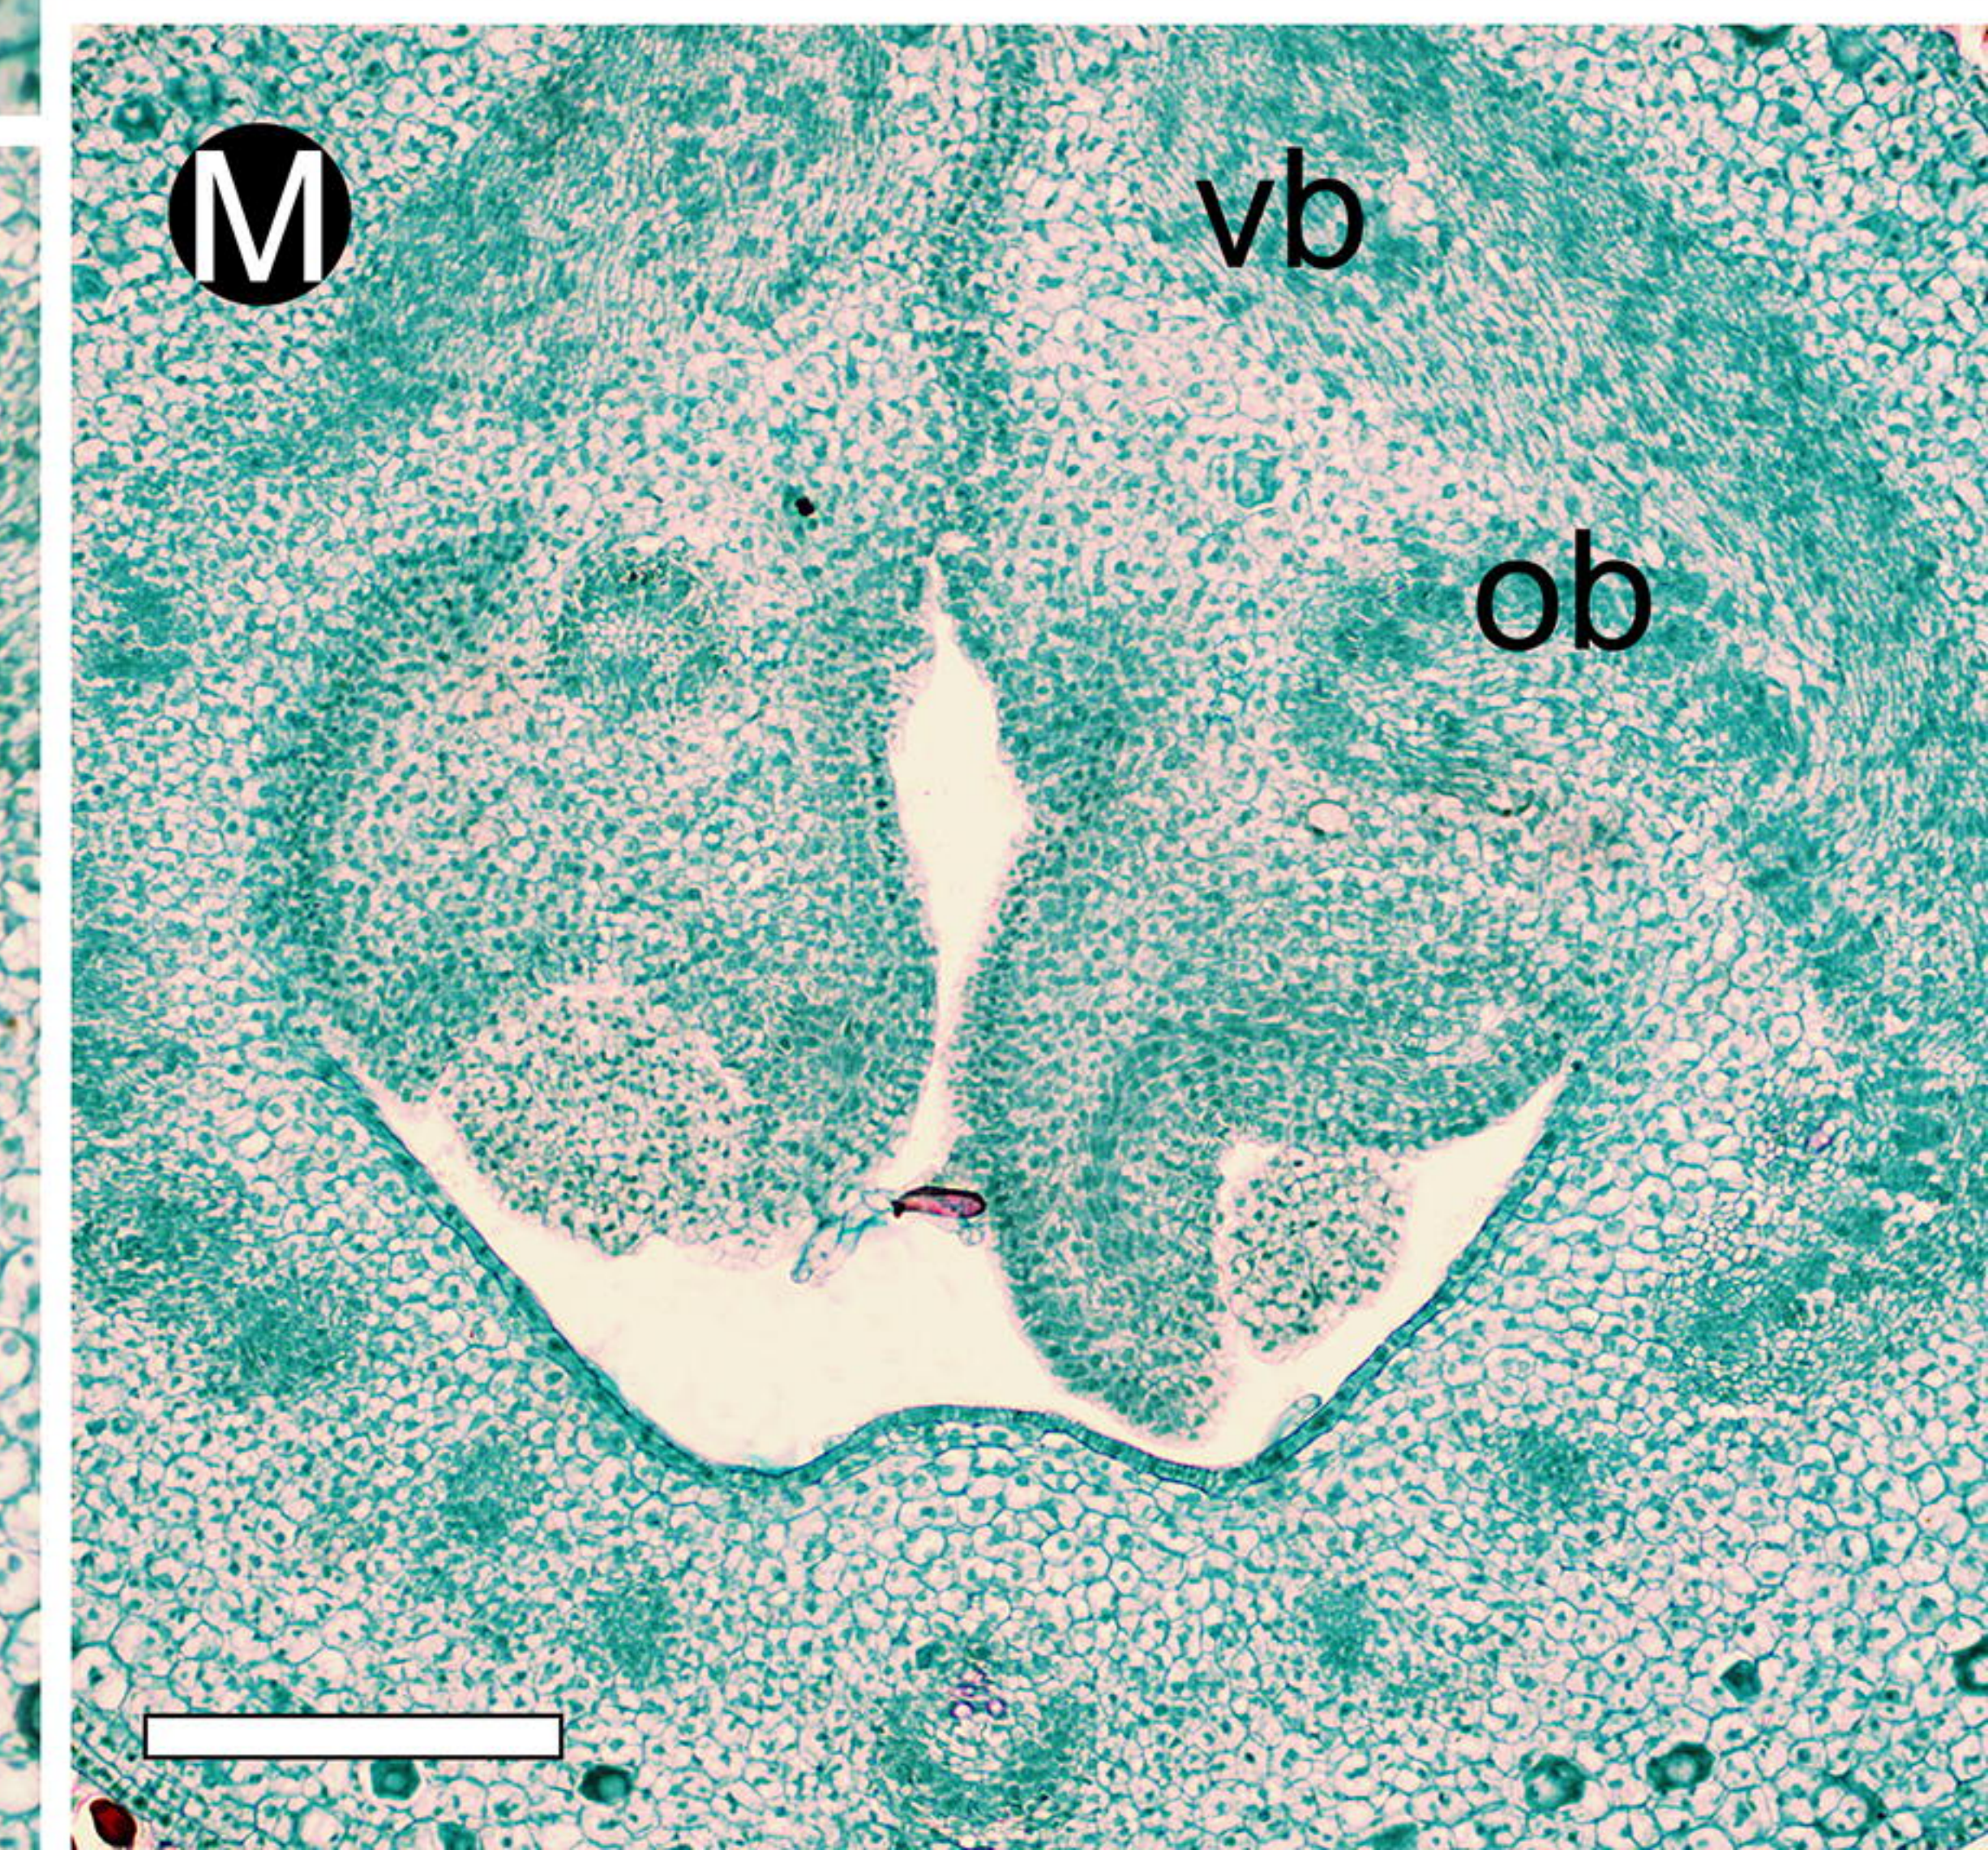

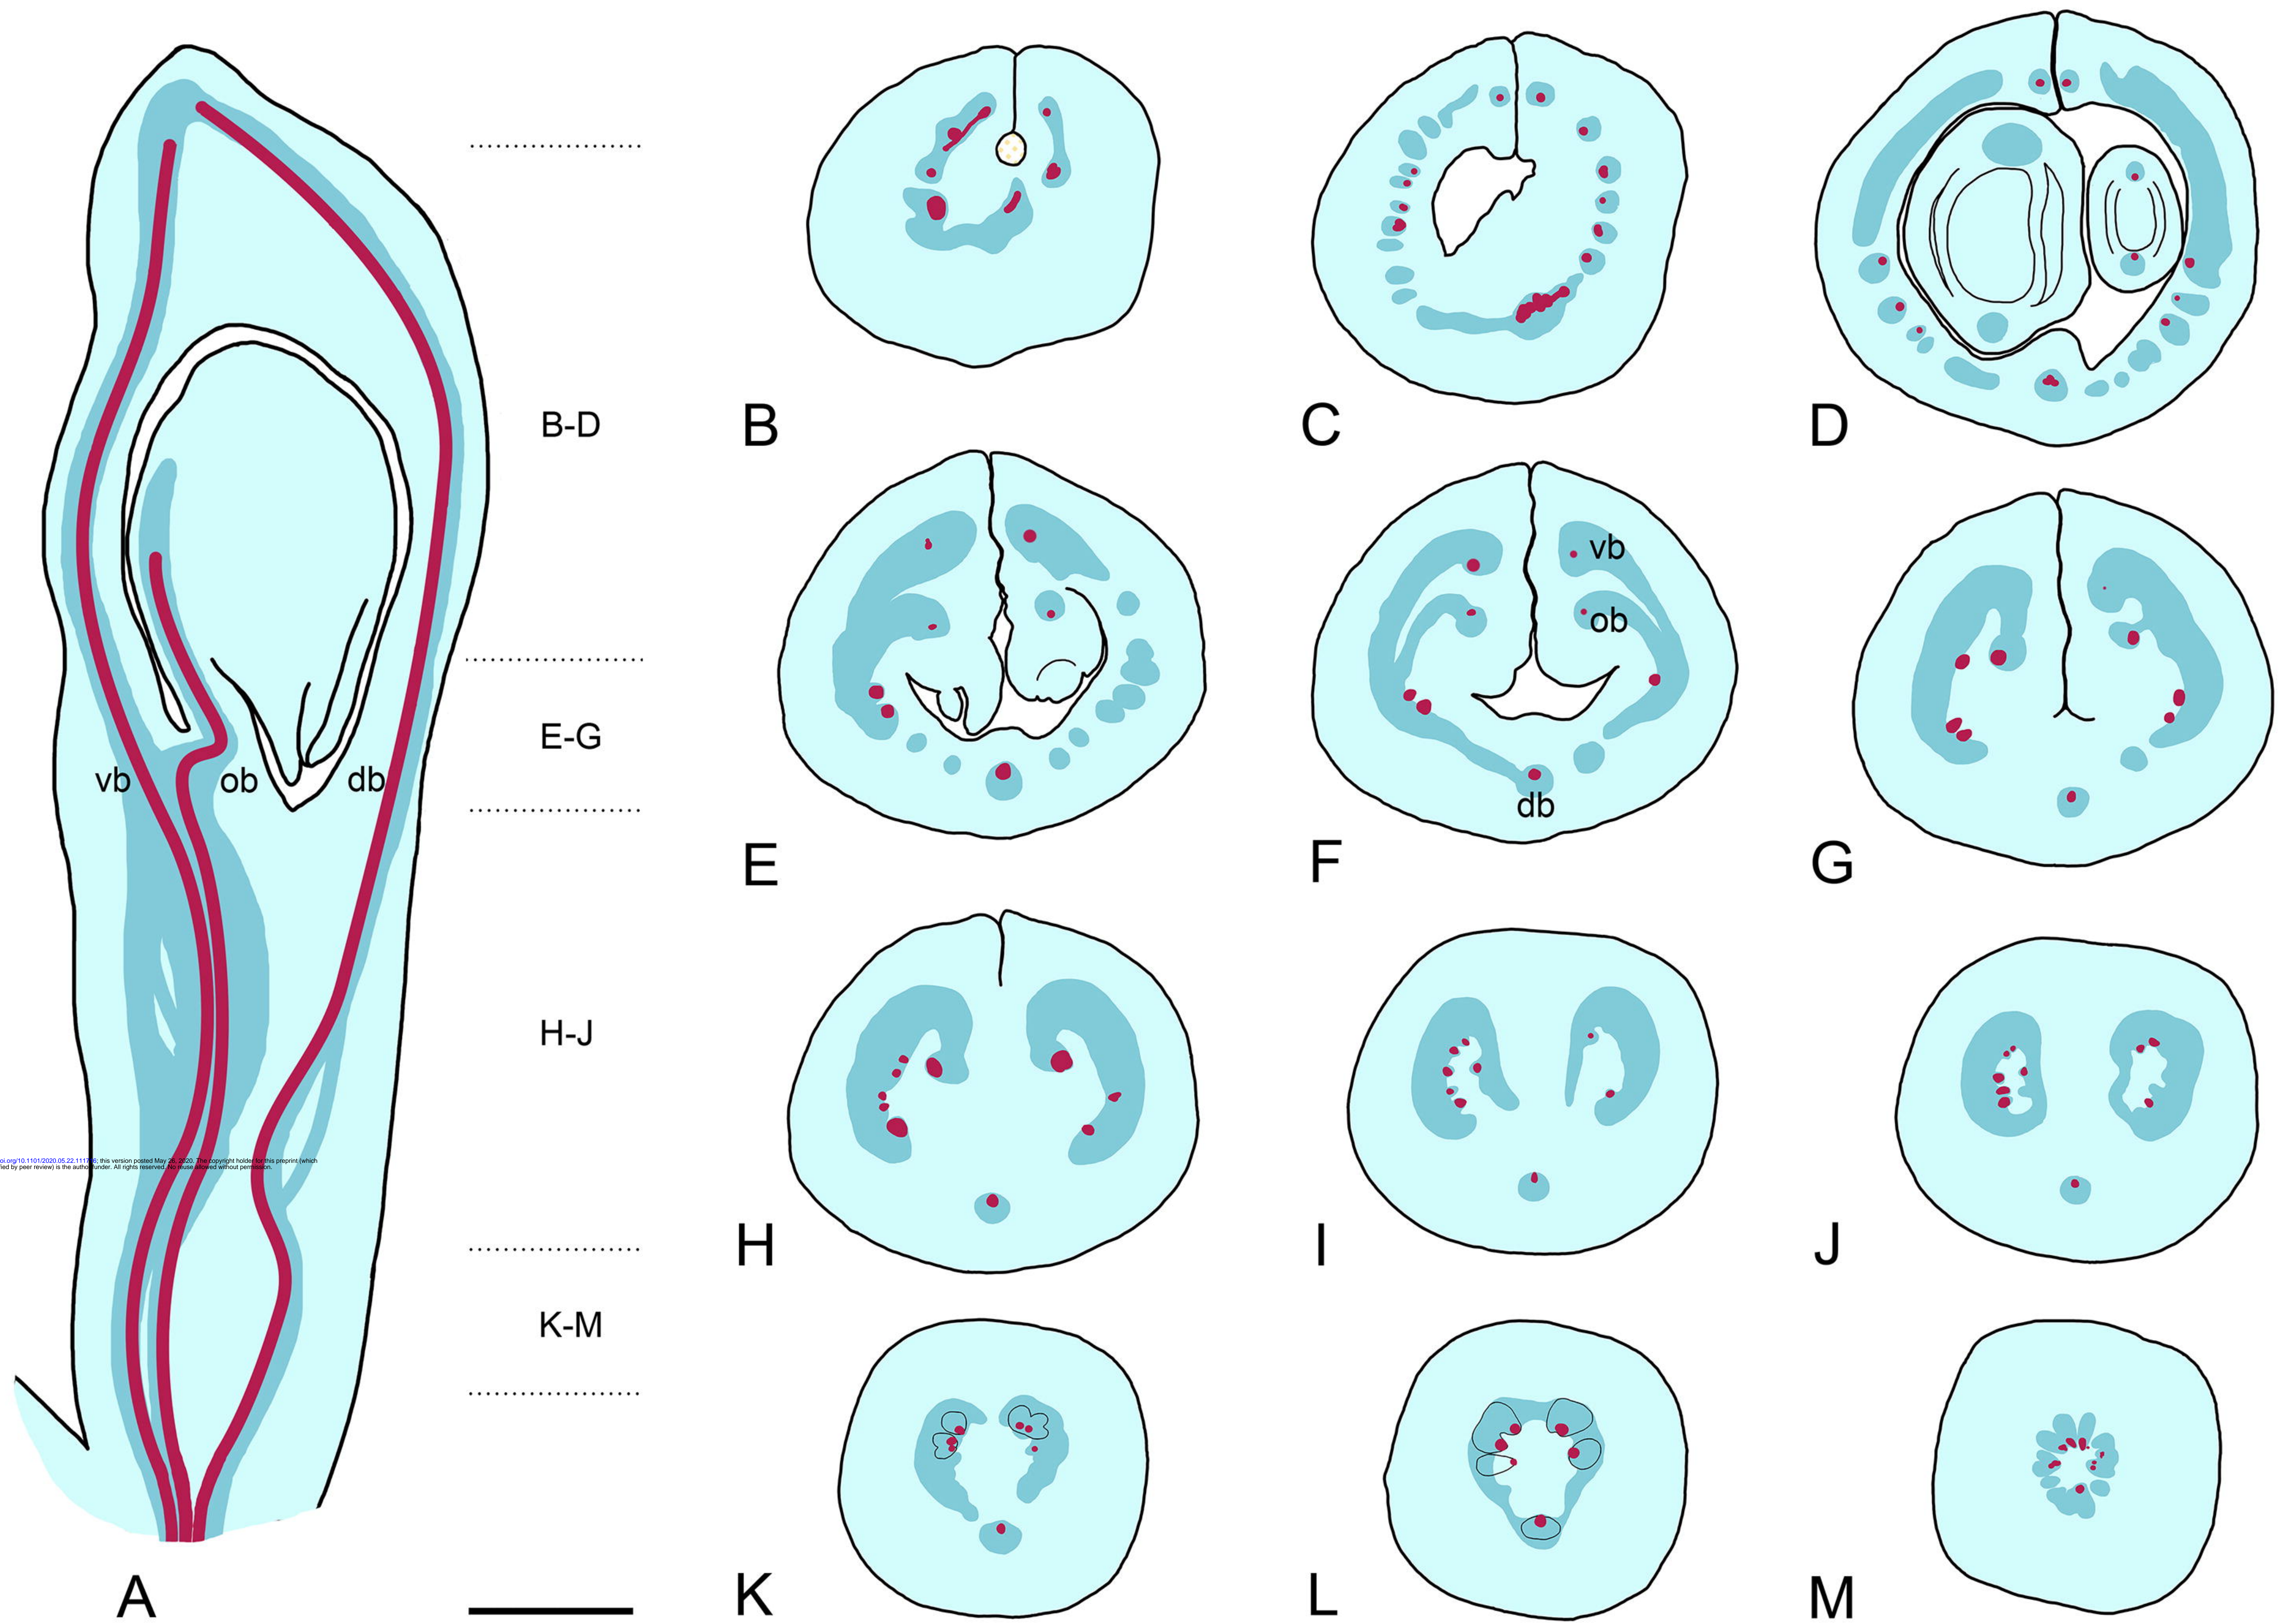

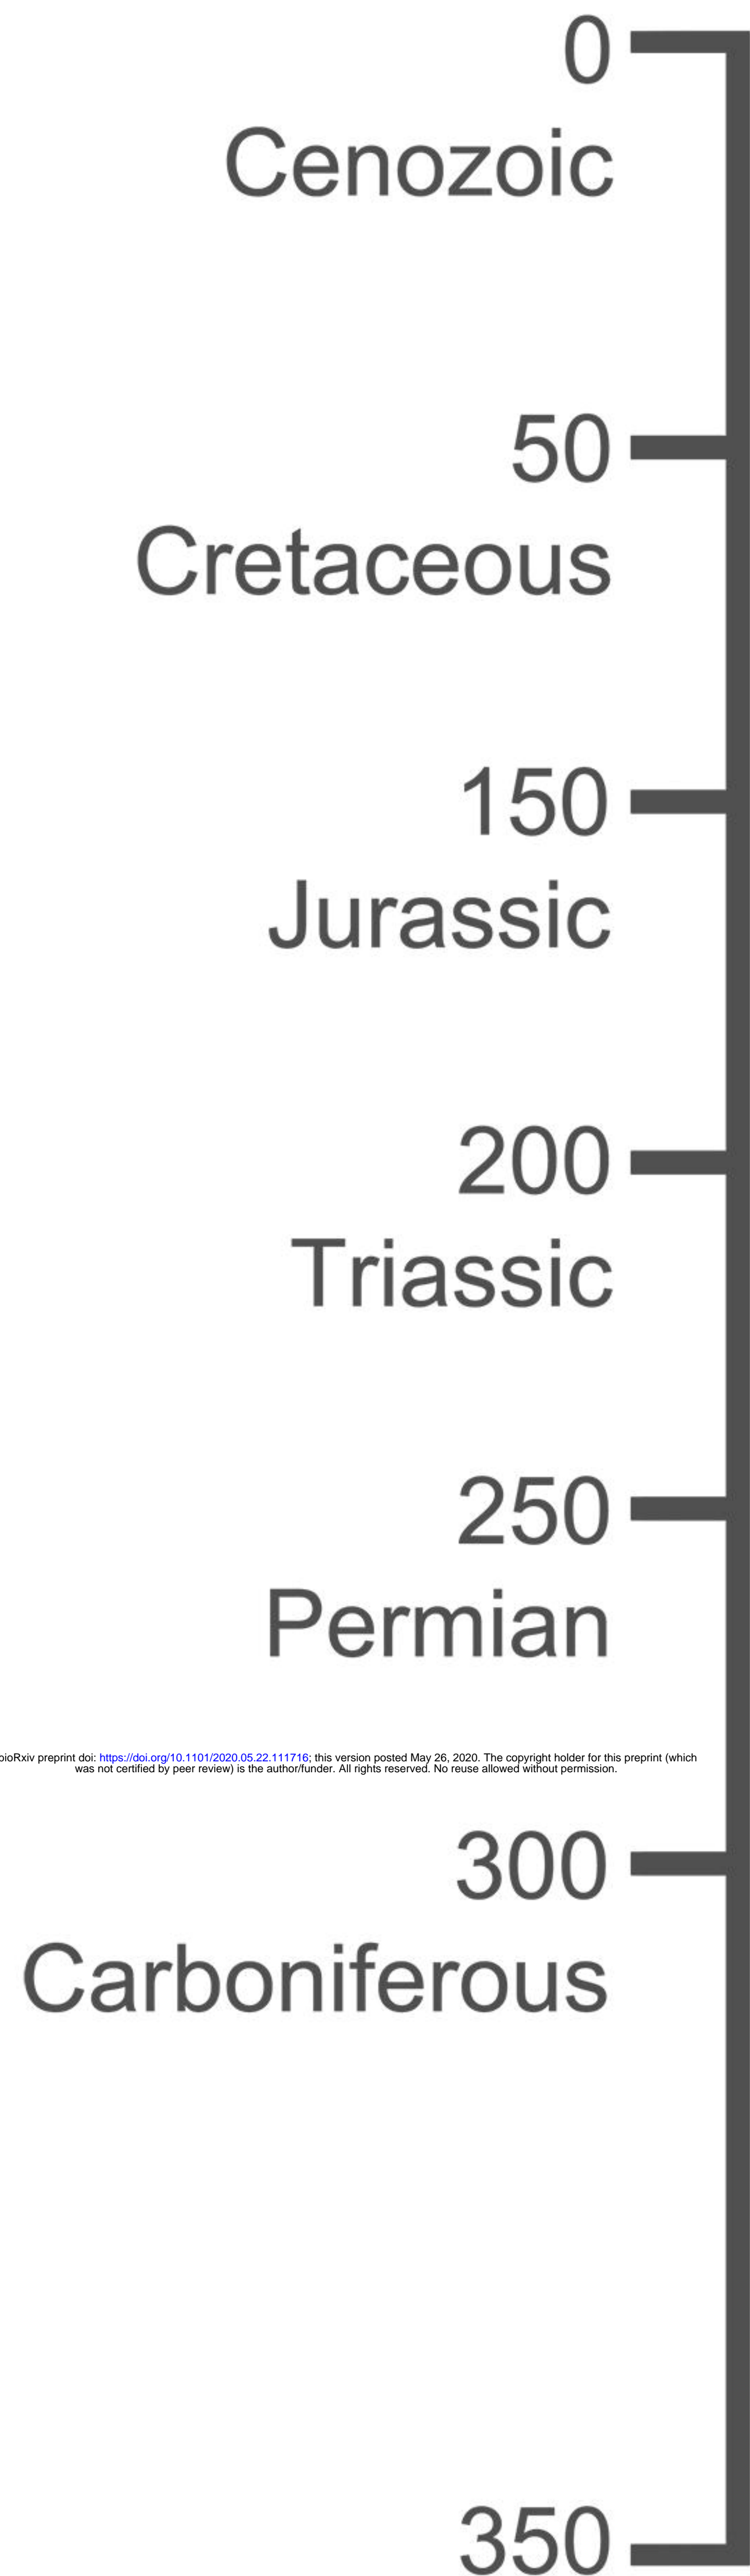

Conifers

Gnetophytes

Angiosperms

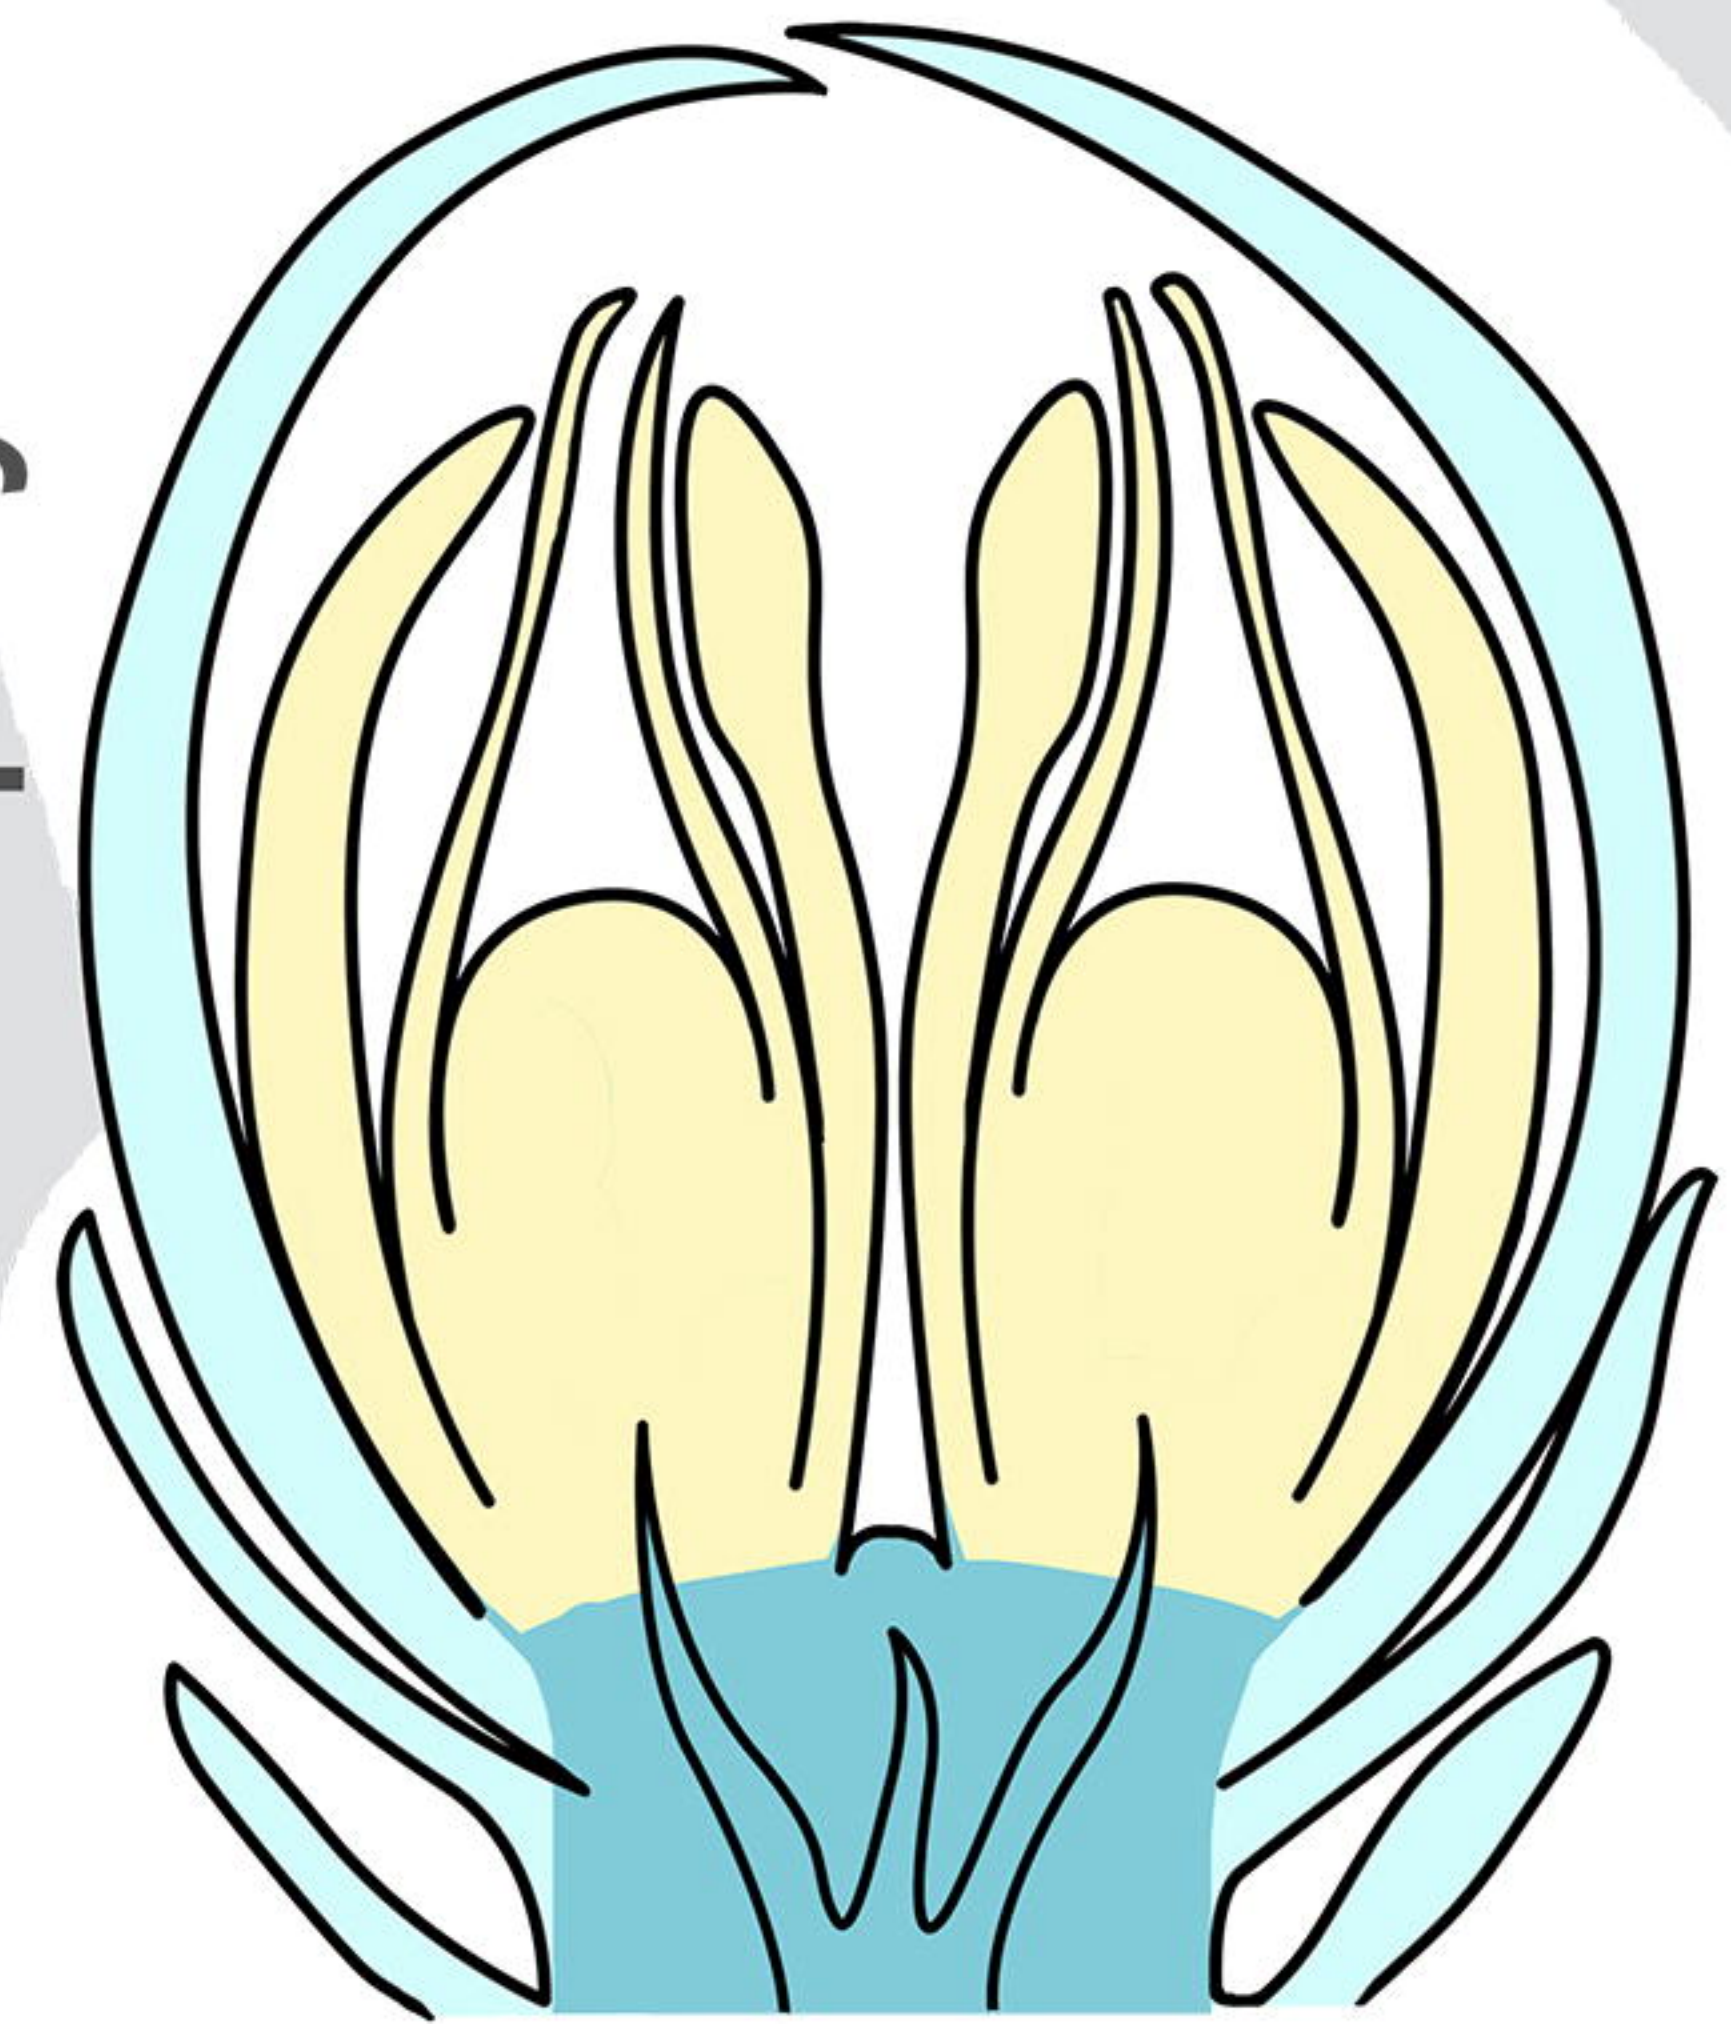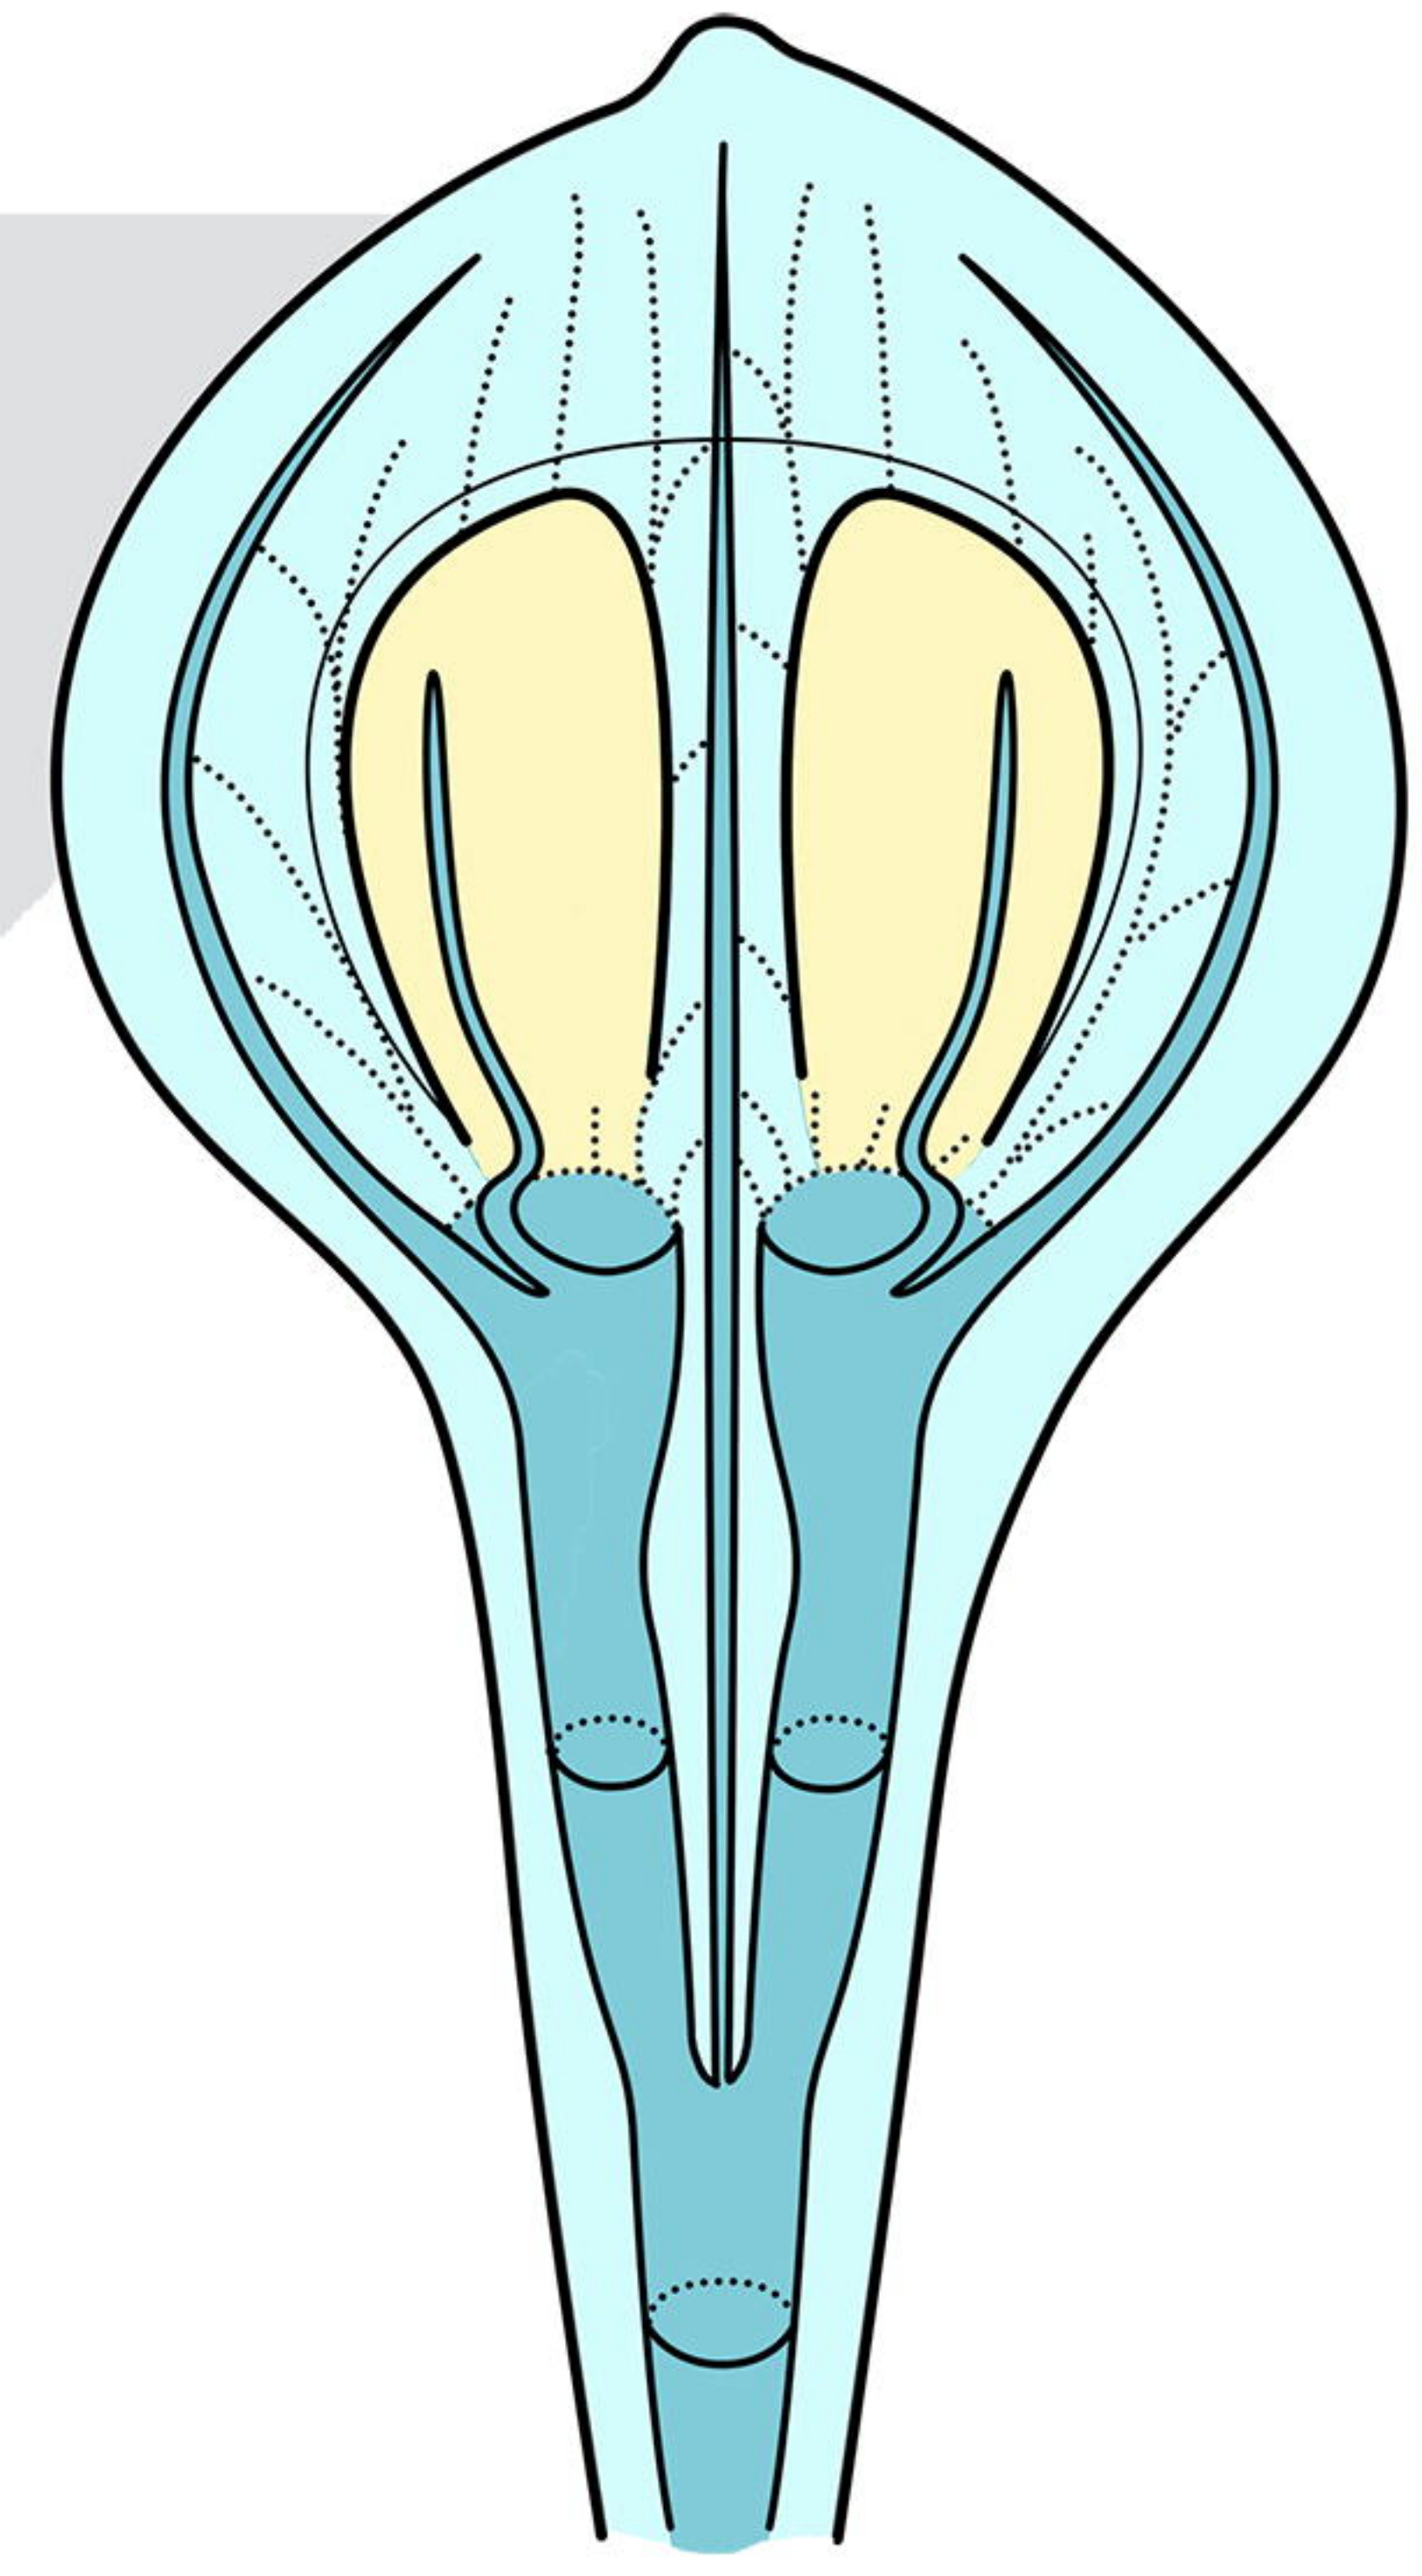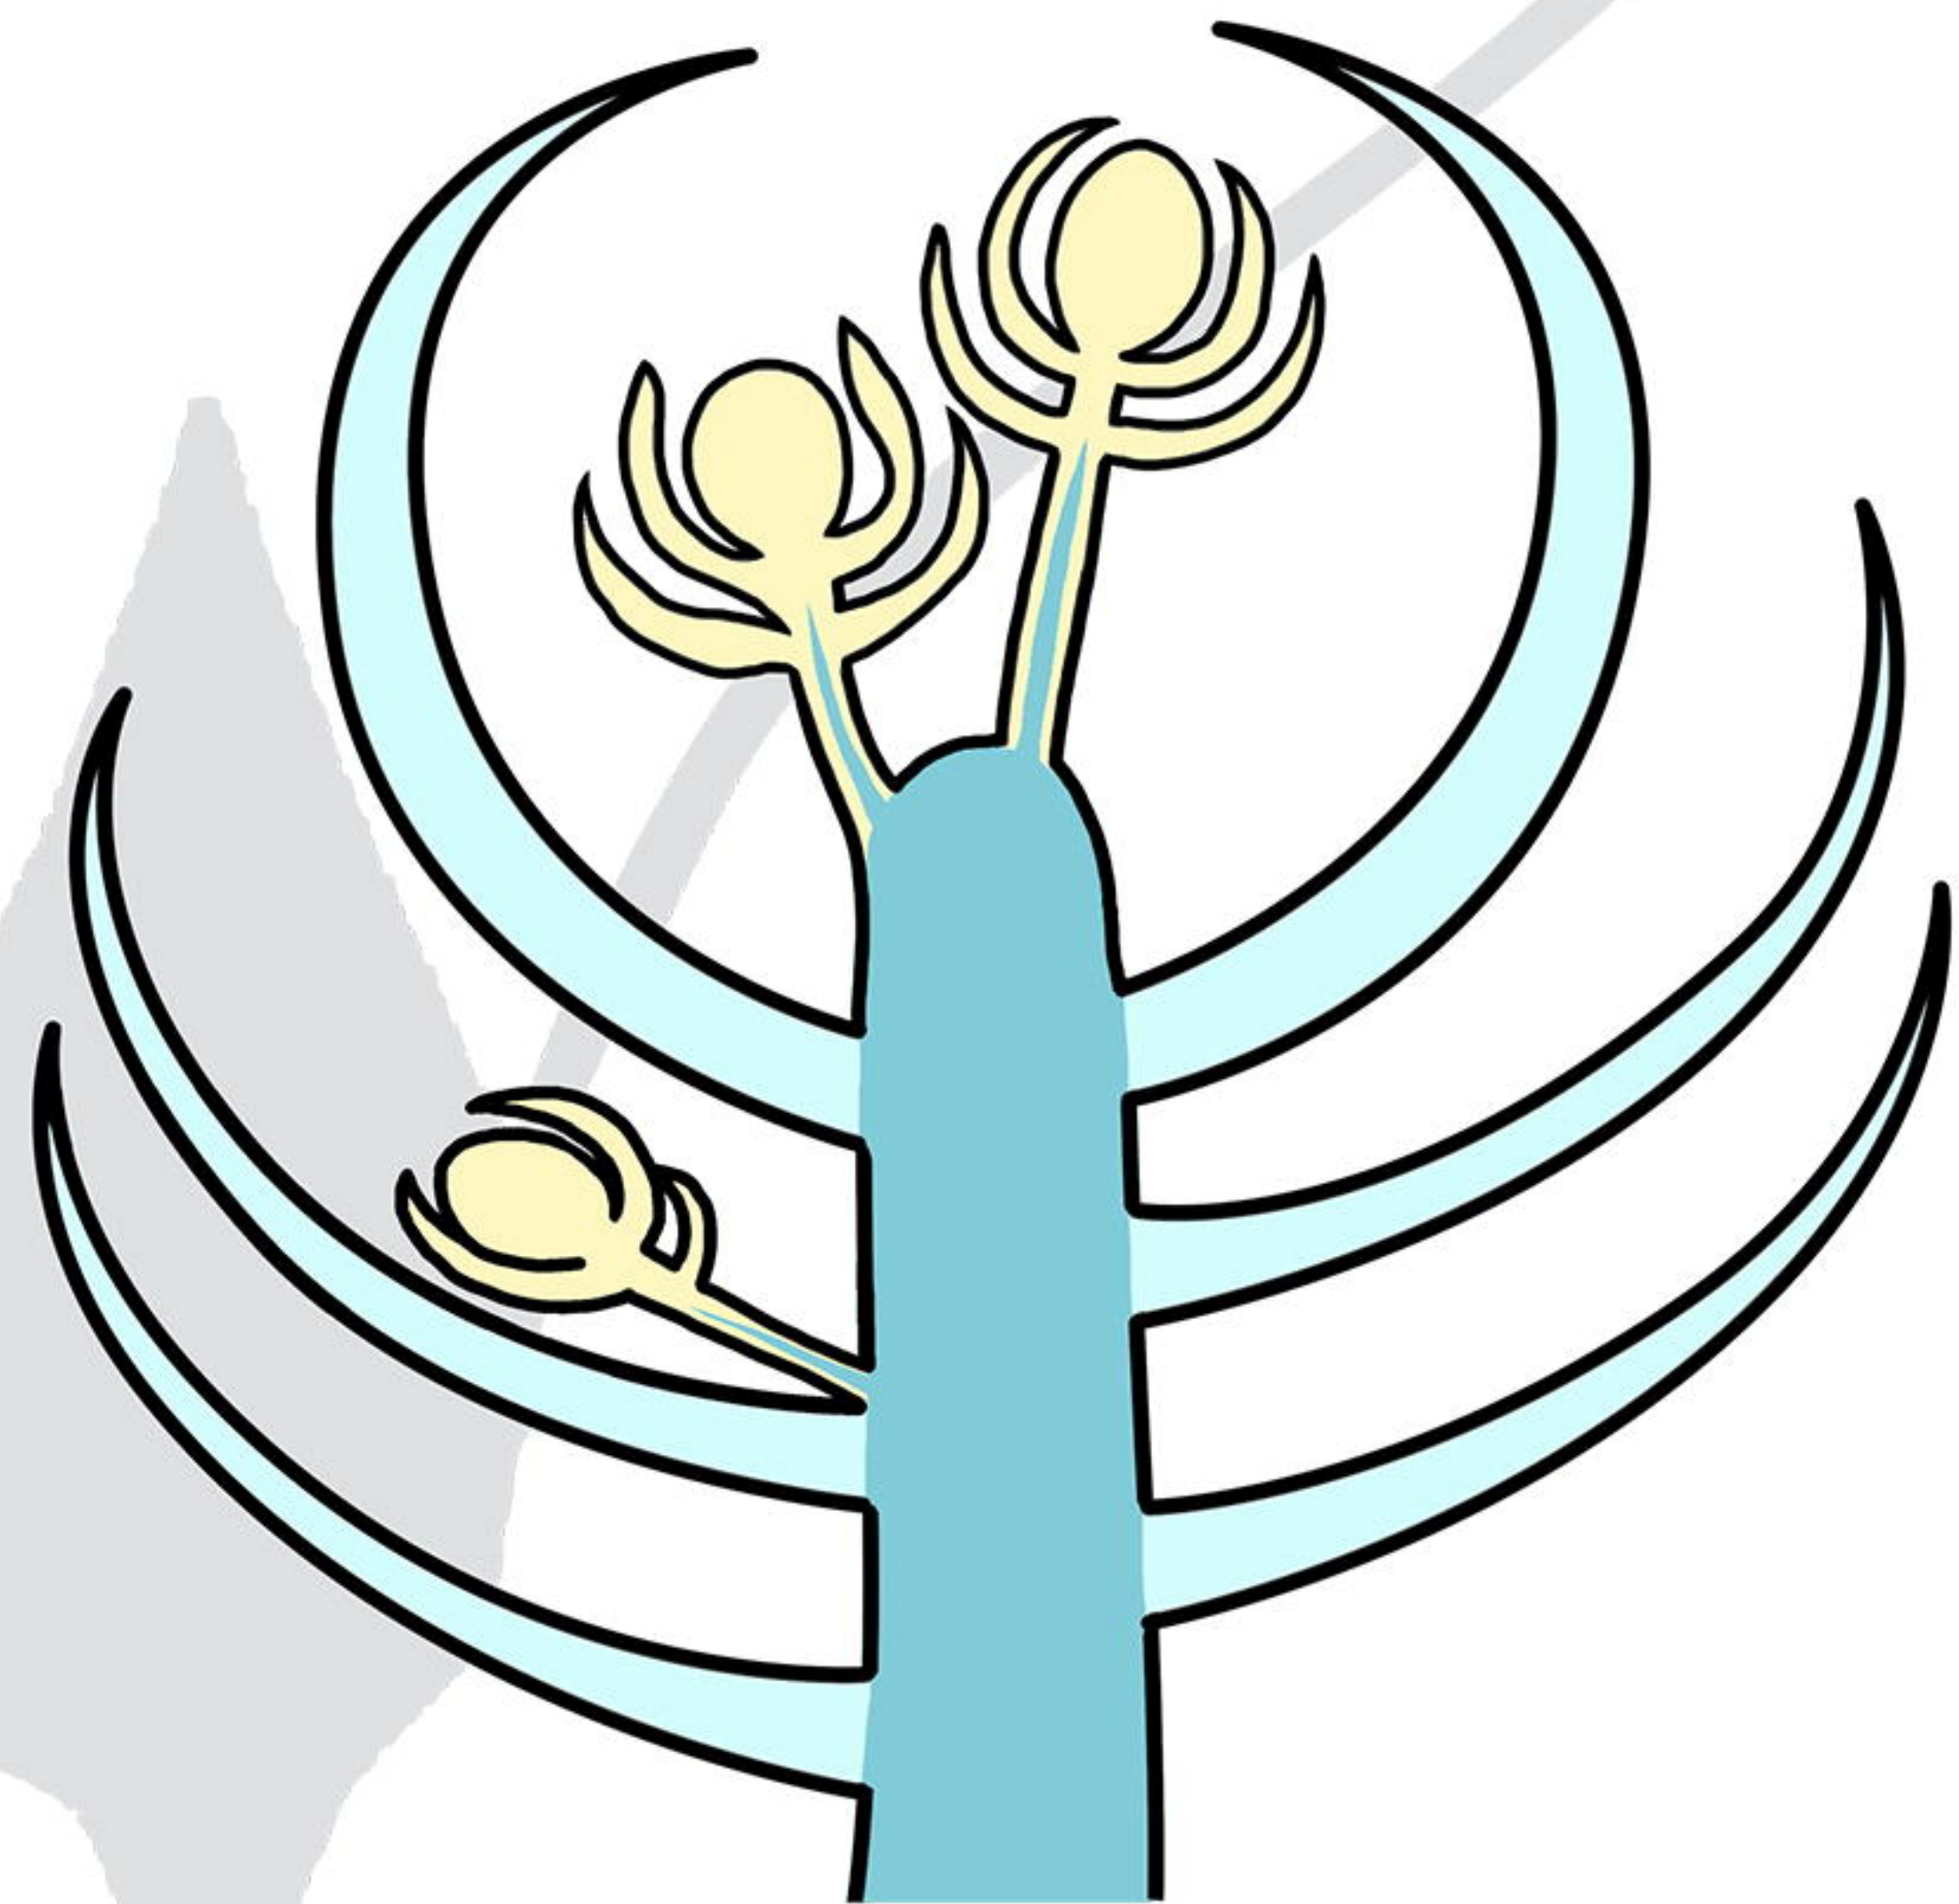

- ovule (with bracts)
- shoot homologs
- leaf homologs

bioRxiv preprint doi: <https://doi.org/10.1101/020105>; this version posted May 26, 2020. The copyright holder for this preprint (which was not certified by peer review) is the author/funder. All rights reserved. No reuse allowed without permission.
